# Supplementary material
Source: MDPI journal article supplement (https://www.mdpi.com/2504-446X/7/6/396)
Supplement: s1 [file s1]

## File S1: Questionnaire

This is the survey as it was presented to participants. The only change was that in the cases where a rank had to be included, there was a slider from zero to ten.



*\* Changez la langue si besoin en haut à droite / Cambie la lengua si lo necesita arriba a la derecha / Ändra språket om det behövs överst till höger / Vaihda tarvittaessa kieltä oikeassa yläkulmassa / Ändern Sie die Sprache bei Bedarf oben rechts / Muuta kieltä oikeasta yläreunasta tarvittaessa \**

The use of drones (Unmanned Aerial Vehicles) is expected to increase in the future, and they are already used for surveillance, photo and film production, research data collection, cargo delivery and even for carrying medical equipment, contributing to saving lives.

However, they also make noise and might be considered irritating to look at. The latter is called Visual pollution, and the purpose of this survey is to get an understanding for how the public perceives potential visual pollution of drones.

By answering a set of simple questions, and rating the level of visual pollution in a set of images, you will help us understand how drones are perceived and how they contribute to visual pollution. This will help in later planning of how the drones will be allowed to fly.

This survey will take approximately 10 minutes to complete, and you can go backwards and forward. Thank you for your time and feel free to spread the questionnaire.

Please note that the scenarios shown in the images may not be realistic or representative for how drones will be allowed to fly.

Participating in this study is voluntary. By completing this survey, you are consenting to participate in the study. The answers of this survey will only be used in academic purposes and no personal information of the participants will be made available or spread to other parties.

The study is performed by Linköping University ([www.liu.se](http://www.liu.se)), Sweden, within the AiRMOUR project (<https://airmour.eu/>). Questions and comments may be directed to [tobias.andersson.granberg@liu.se](mailto:tobias.andersson.granberg@liu.se)

---

### How to fill in the paper survey

Below you can see how you mark an answer option in the check boxes, and how you change a selection.

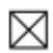

The answer option has been marked correctly

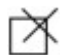

The answer option has been marked incorrectly, the cross must be in the middle of the box

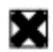

The answer option has been marked incorrectly, the cross is too strong

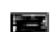

Changed selection, the answer option will not be counted as being marked

**The drones shown in this questionnaire are autonomous (do not require a pilot) and can transport 220 kg of payload at a 35 km range.**

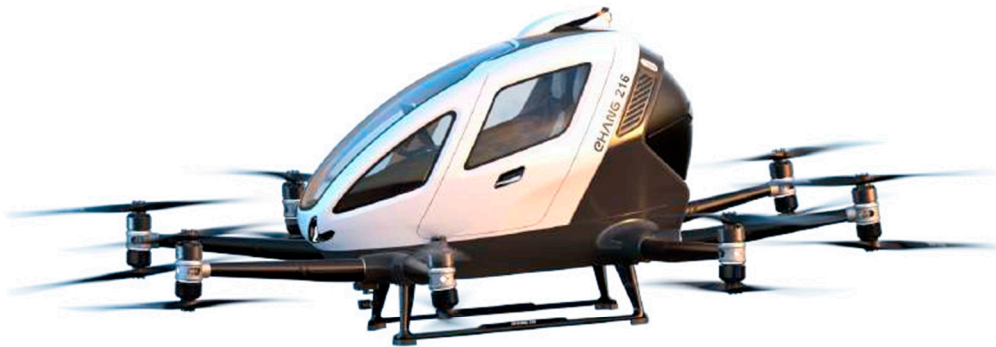

**When painted as an ambulance, as in the image below, it is an emergency medical services drone, transporting e.g. medical personnel, equipment or patients.**

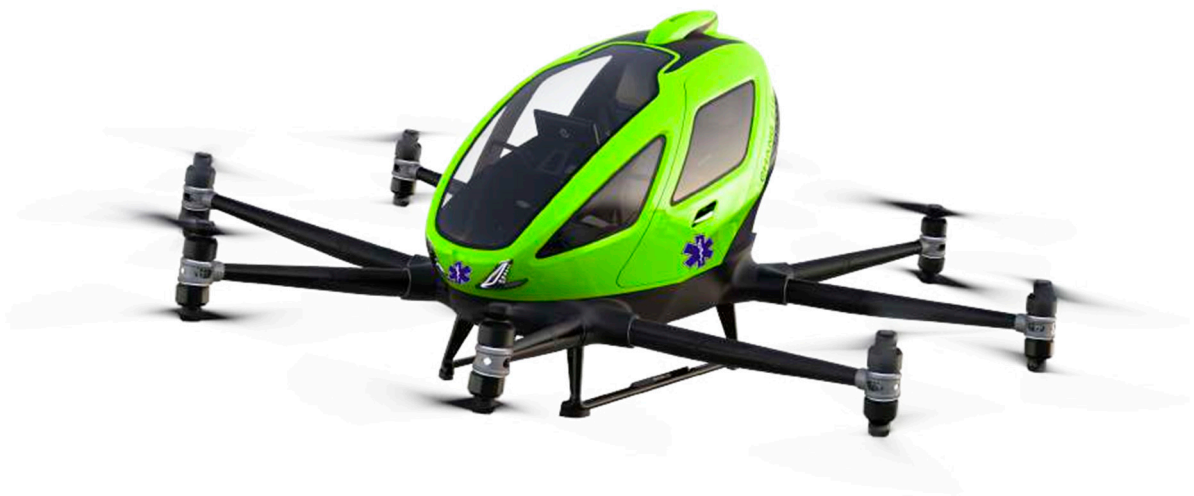

**How old are you?**

- ☐ Less than 18
- ☐ From 18 to 30
- ☐ From 30 to 50
- ☐ From 50 to 65
- ☐ More than 65

**In general, do you have a positive opinion about drones?**

- +
- 
- +
- ☐ Yes
  - ☐ No
  - ☐ Don't know

**What is your current level of knowledge about drones and their possible uses?**

- ☐ None
- ☐ Basic (I could easily write a paragraph on the subject)
- ☐ Medium (I could easily write a page on the subject)
- ☐ Expert (I could easily write five pages on the subject)

**Look at the picture and select**

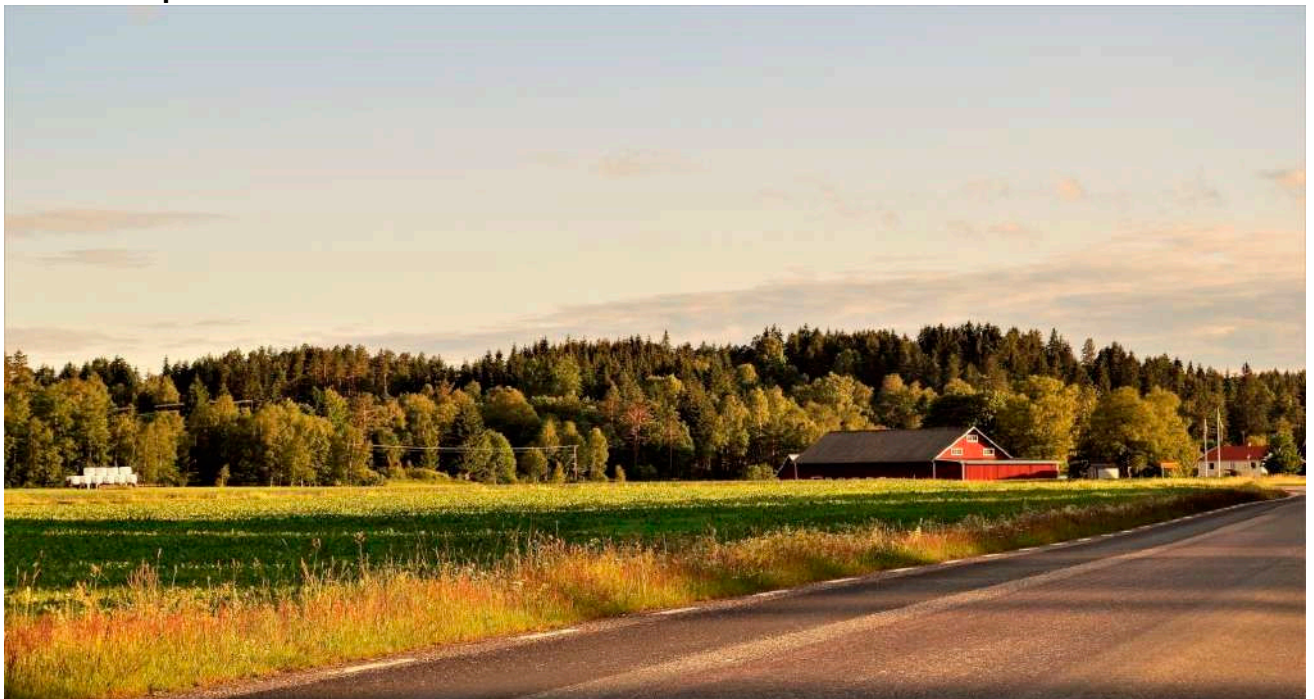

**What is the level of Visual pollution in this image?**

**Is this level of visual pollution tolerable?**

- ☐ Yes
- ☐ No

Look at the  
picture and  
select

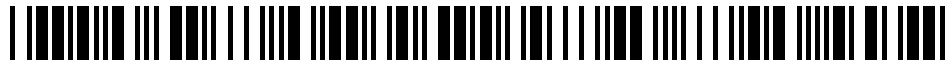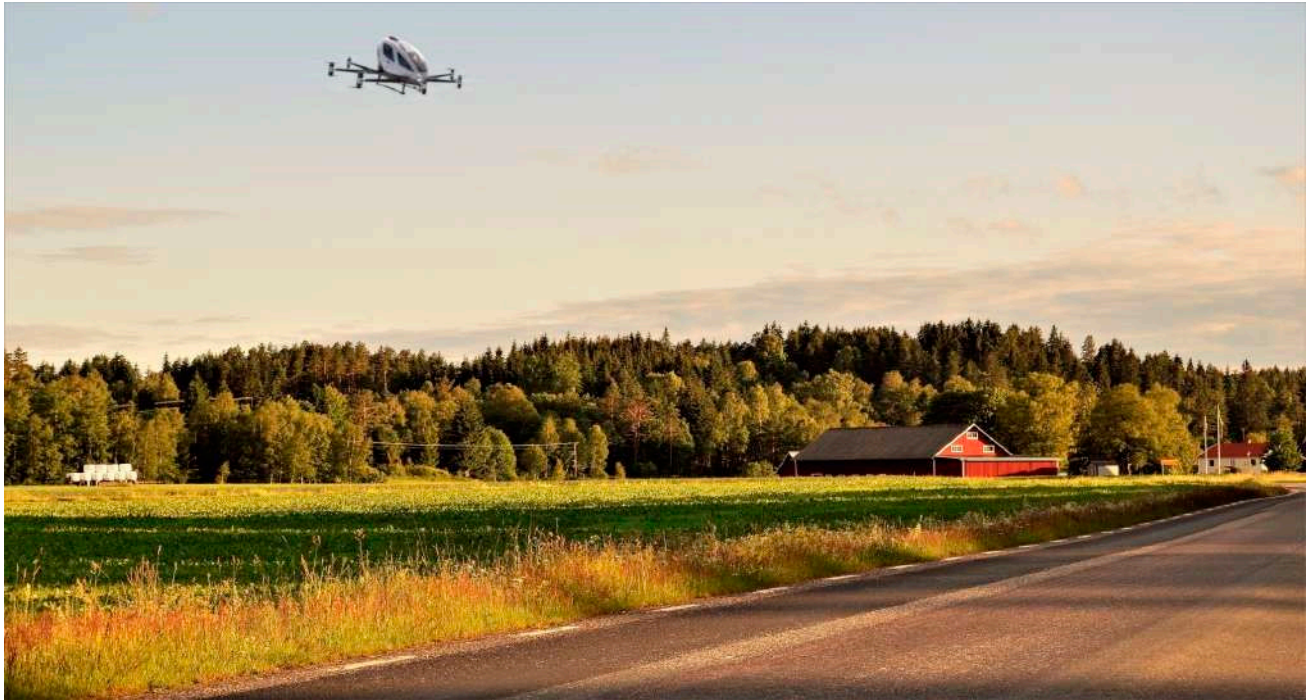

What is the level of Visual pollution in this image?

Is this level of visual pollution tolerable?

- ☐ Yes  
☐ No

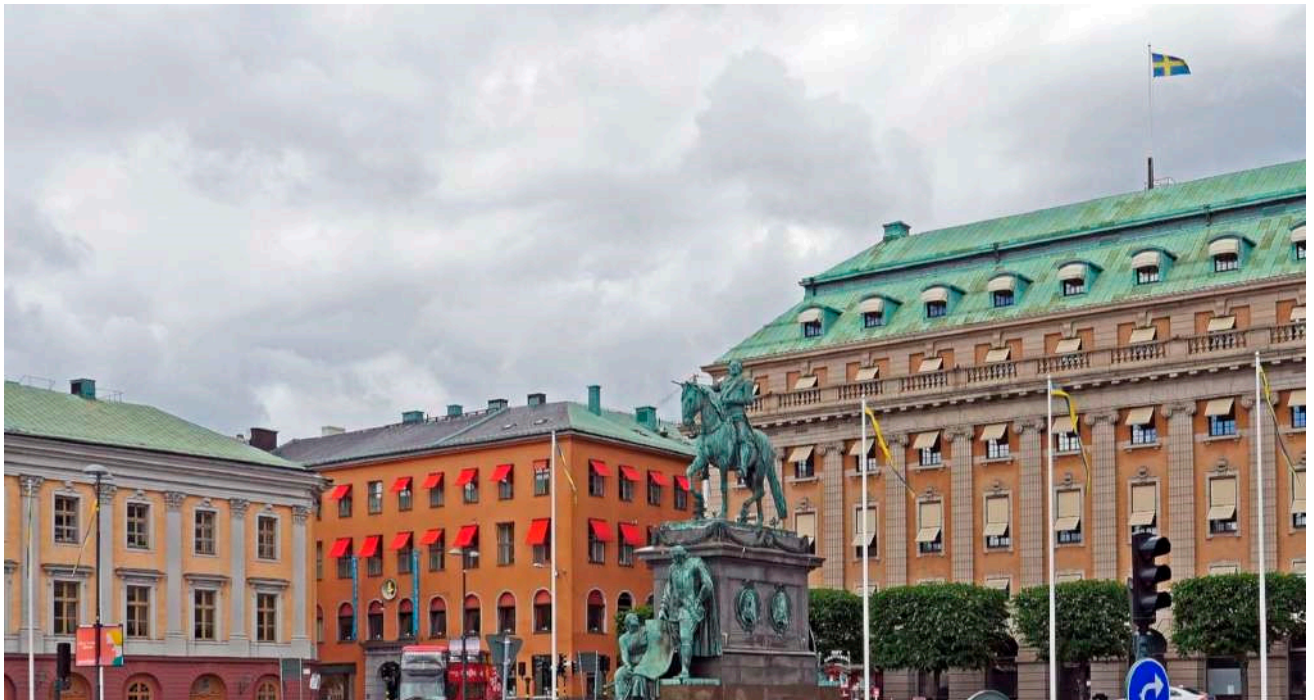

What is the level of Visual pollution in this image?

Look at the  
picture and  
select

Is this level of visual pollution tolerable?

- ☐ Yes  
☐ No

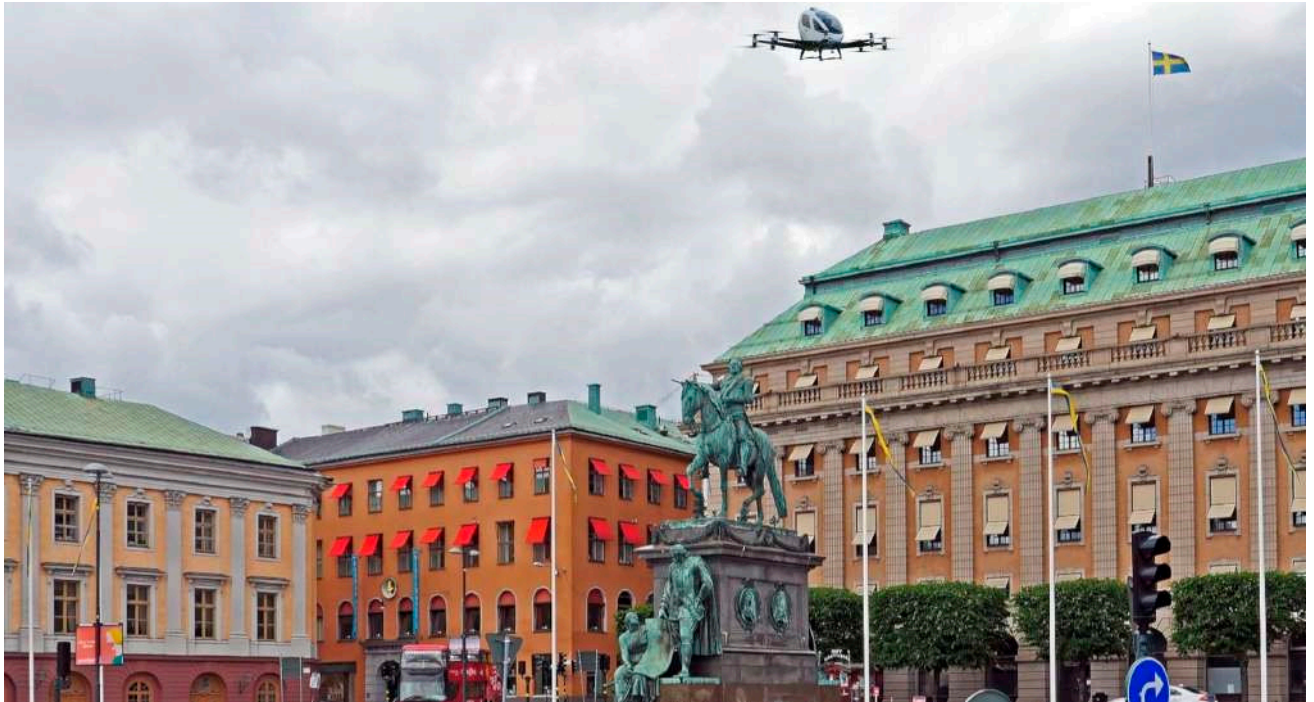

What is the level of Visual pollution in this image?

Is this level of visual pollution tolerable?

- ☐ Yes  
☐ No

Look at the  
picture and  
select

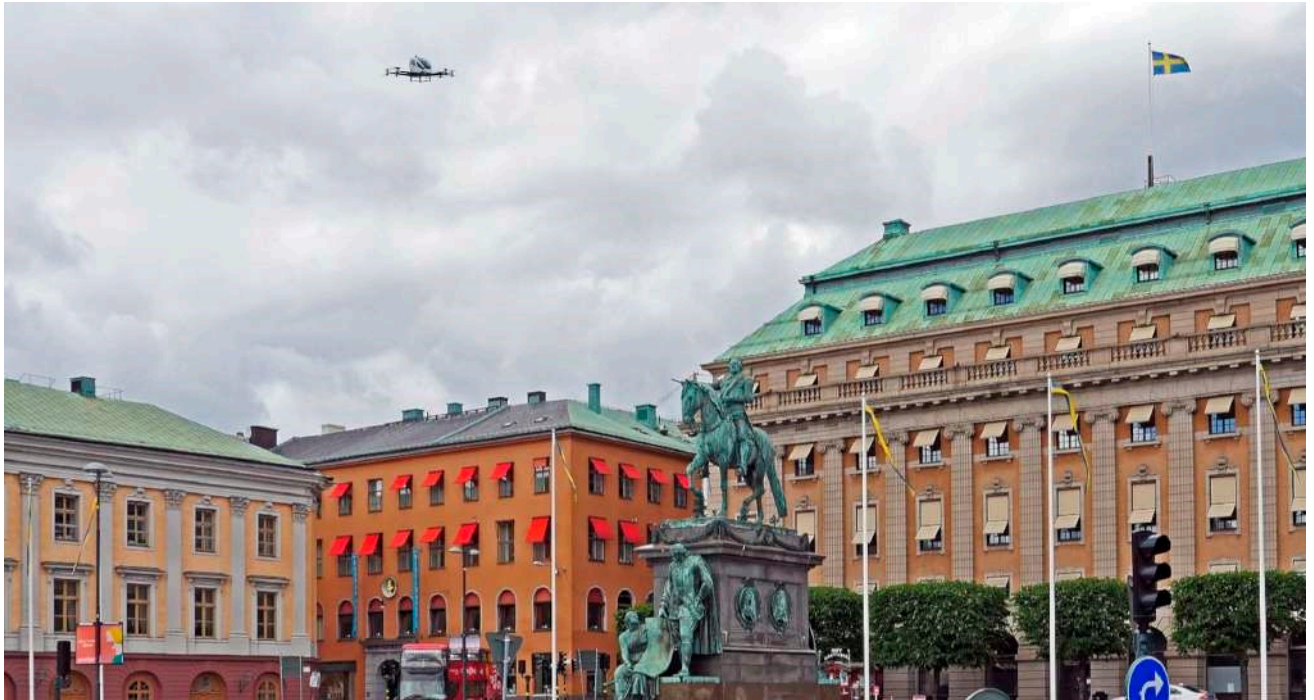

What is the level of Visual pollution in this image?

Is this level of visual pollution tolerable?

- ☐ Yes  
☐ No

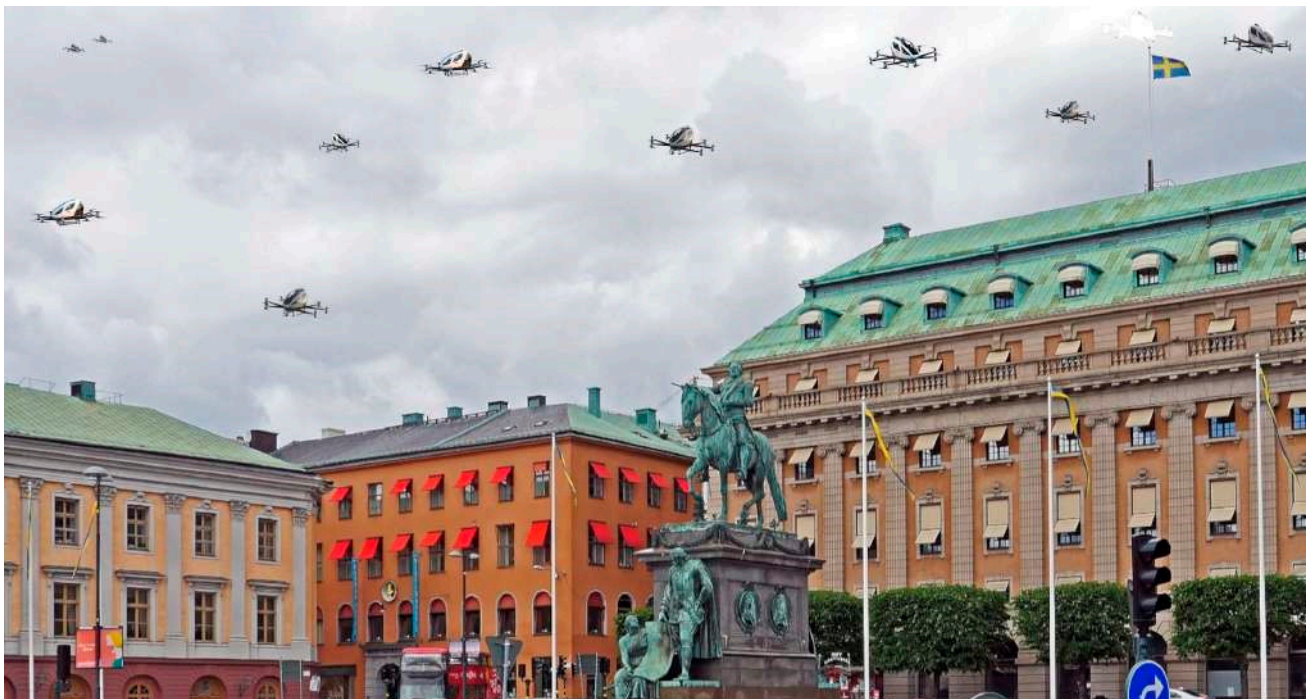

What is the level of Visual pollution in this image?

Look at the  
picture and  
select

Is this level of visual pollution tolerable?

- ☐ Yes  
☐ No

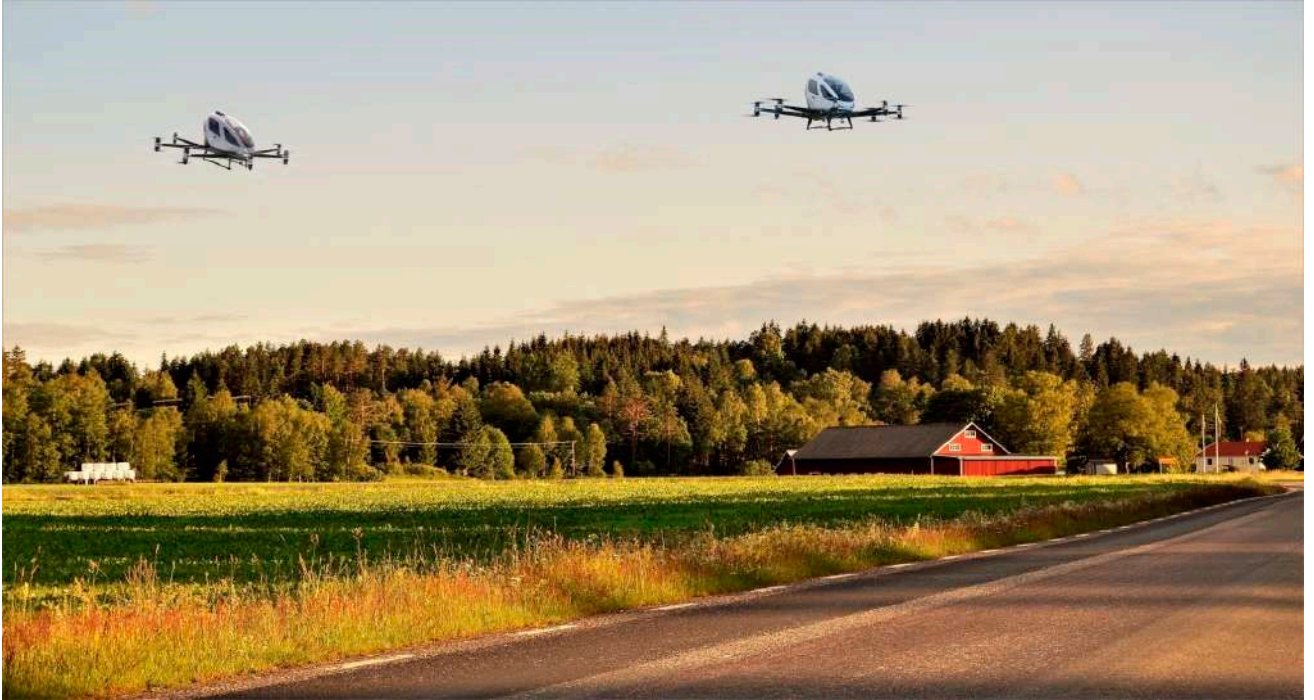

What is the level of Visual pollution in this image?

Is this level of visual pollution tolerable?

- ☐ Yes  
☐ No

Look at the  
picture and  
select

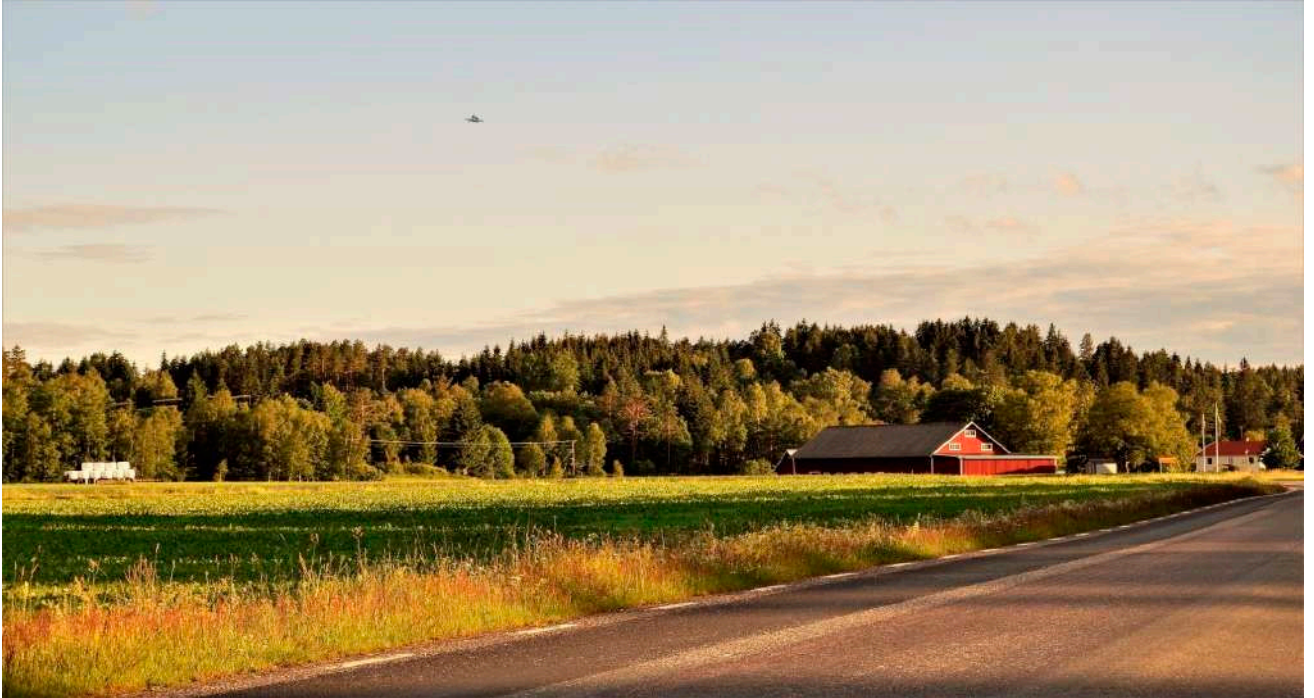

What is the level of Visual pollution in this image?

Is this level of visual pollution tolerable?

- ☐ Yes  
☐ No

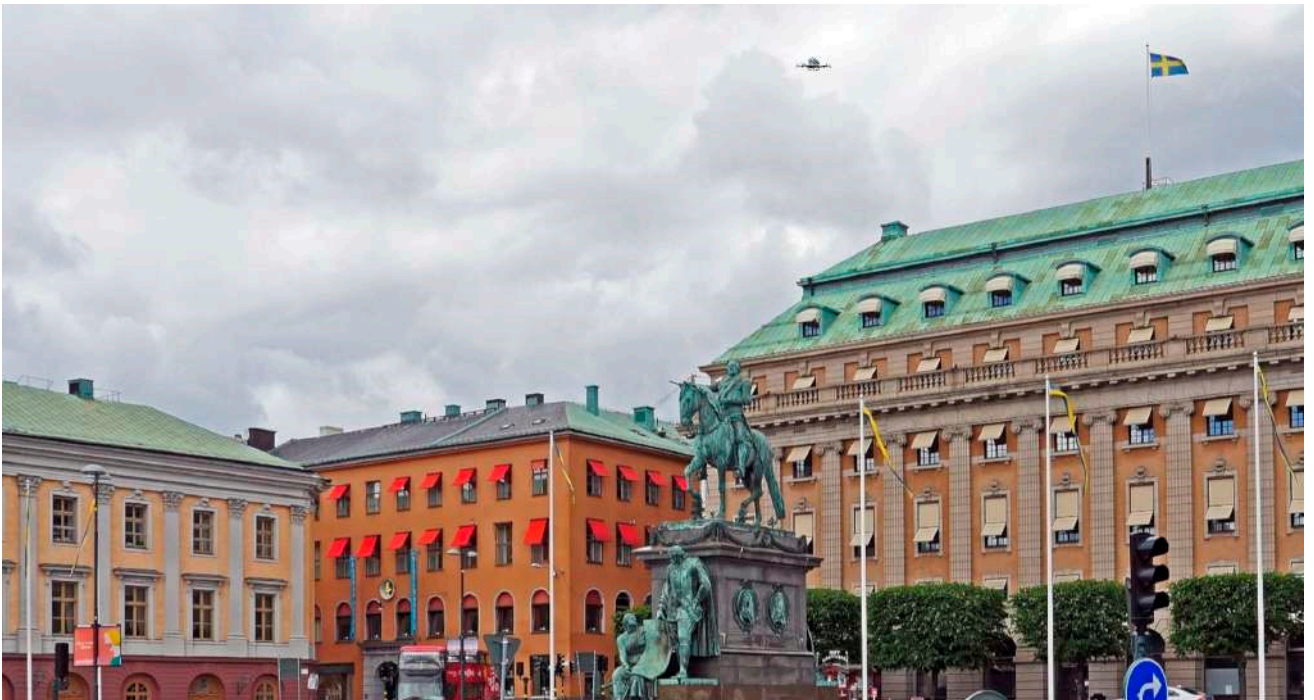

What is the level of Visual pollution in this image?

Look at the  
picture and  
select



Is this level of visual pollution tolerable?

- ☐ Yes  
☐ No

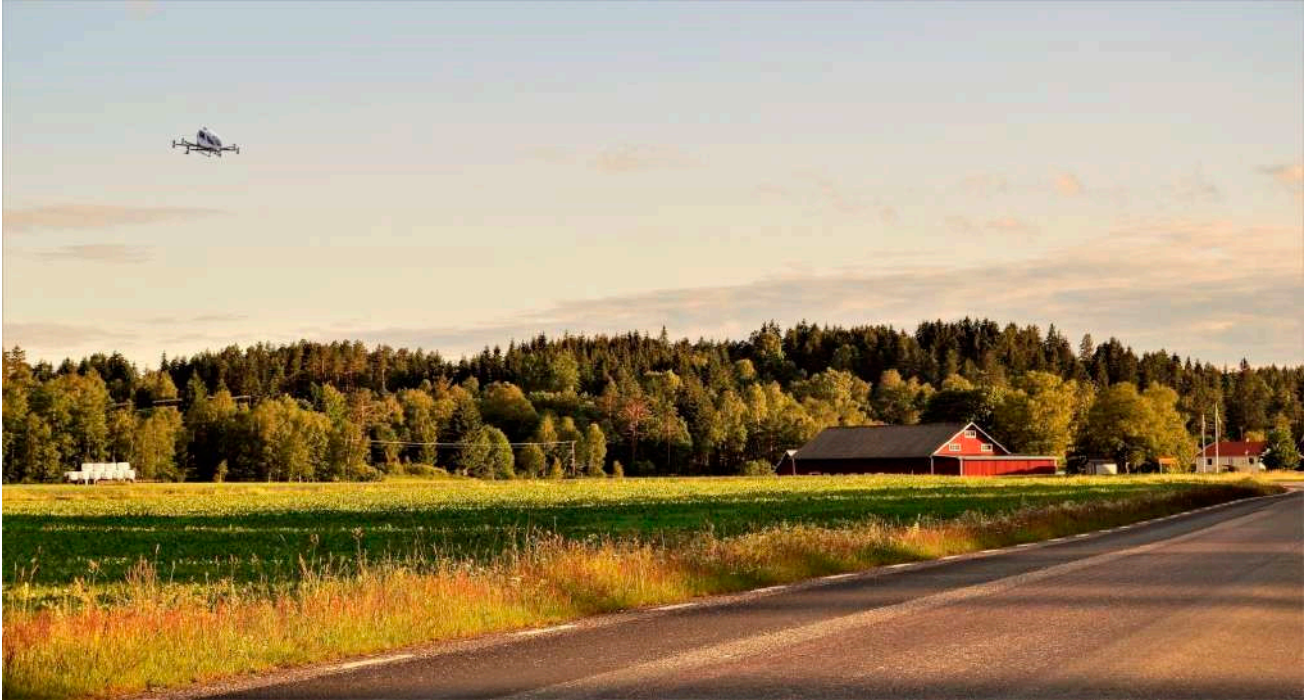

What is the level of Visual pollution in this image?

Is this level of visual pollution tolerable?

- ☐ Yes  
☐ No

Look at the  
picture and  
select

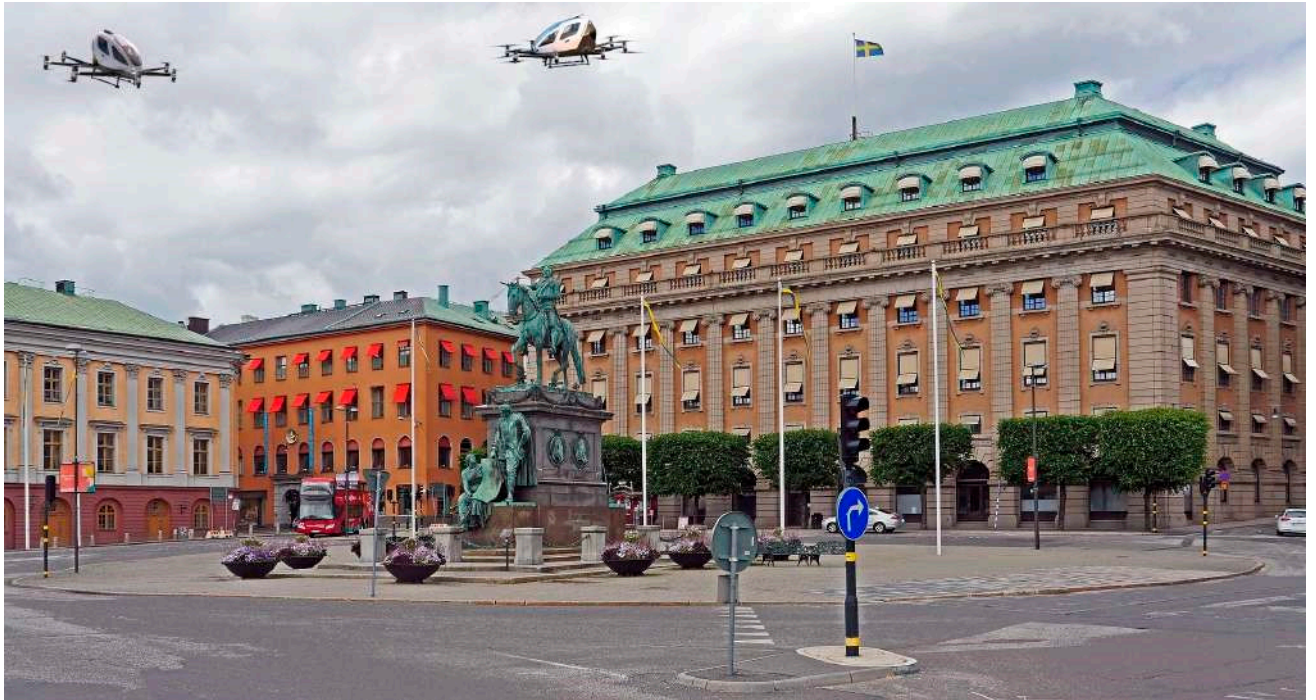

What is the level of Visual pollution in this image?

Is this level of visual pollution tolerable?

- ☐ Yes  
☐ No

Look at the  
picture and  
select

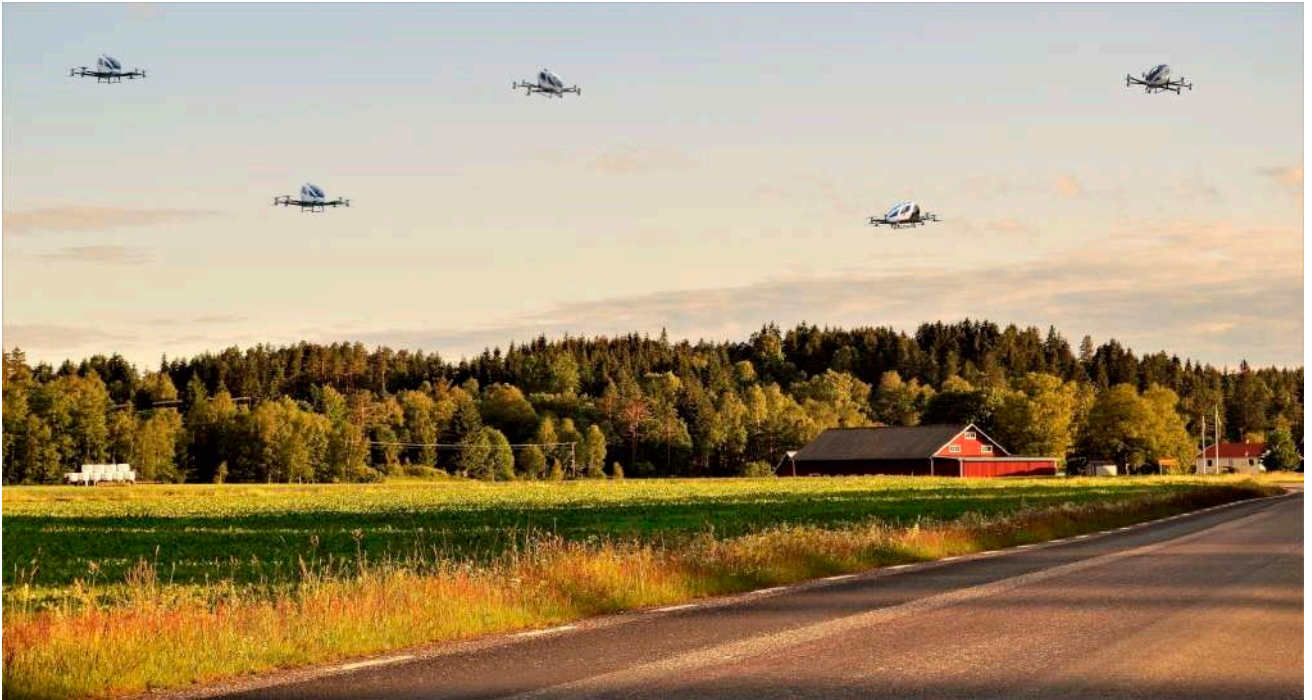

What is the level of Visual pollution in this image?

Is this level of visual pollution tolerable?

- ☐ Yes  
☐ No

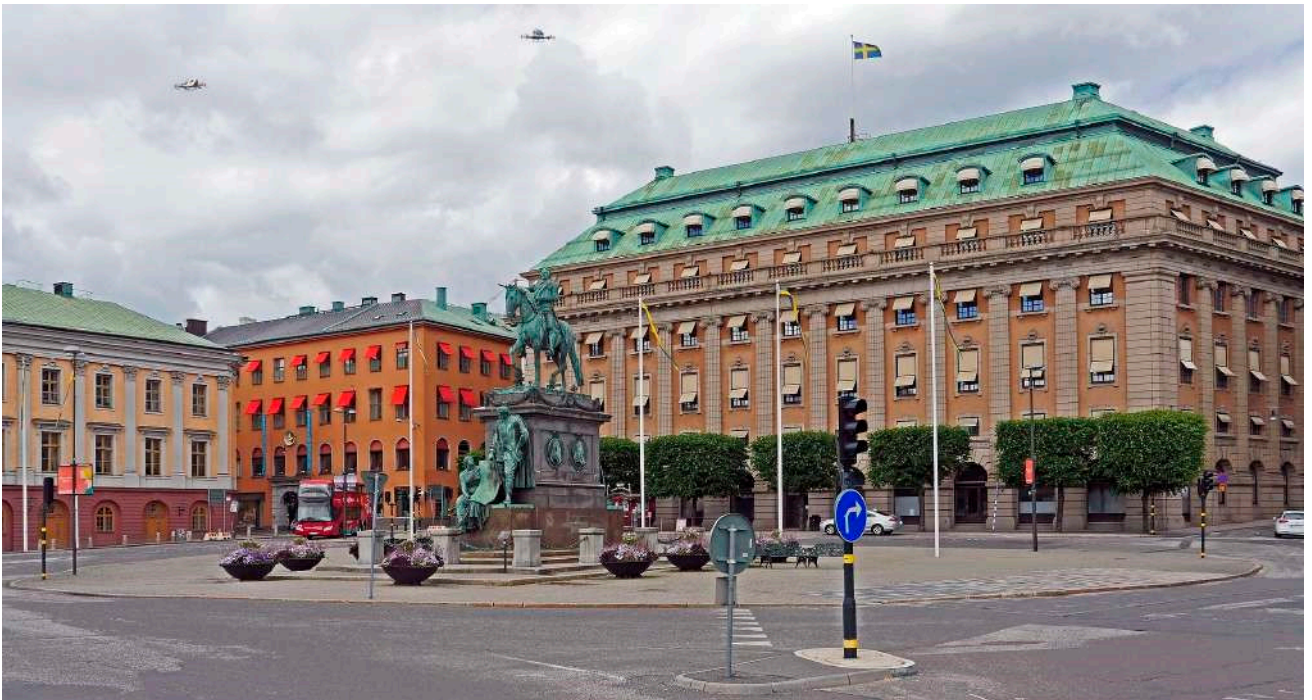

What is the level of Visual pollution in this image?

Look at the  
picture and  
select

Is this level of visual pollution tolerable?

- ☐ Yes  
☐ No

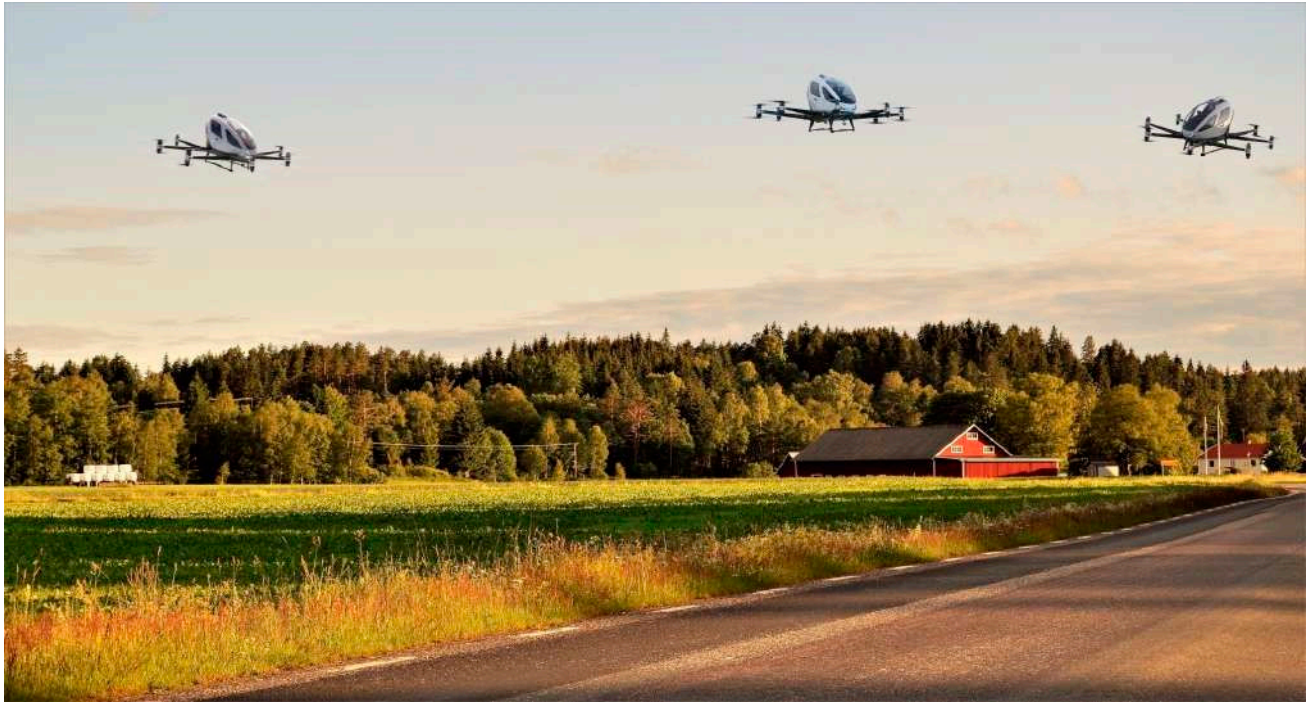

What is the level of Visual pollution in this image?

Is this level of visual pollution tolerable?

- ☐ Yes  
☐ No

Look at the  
picture and  
select

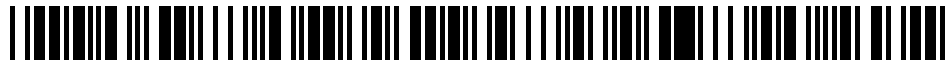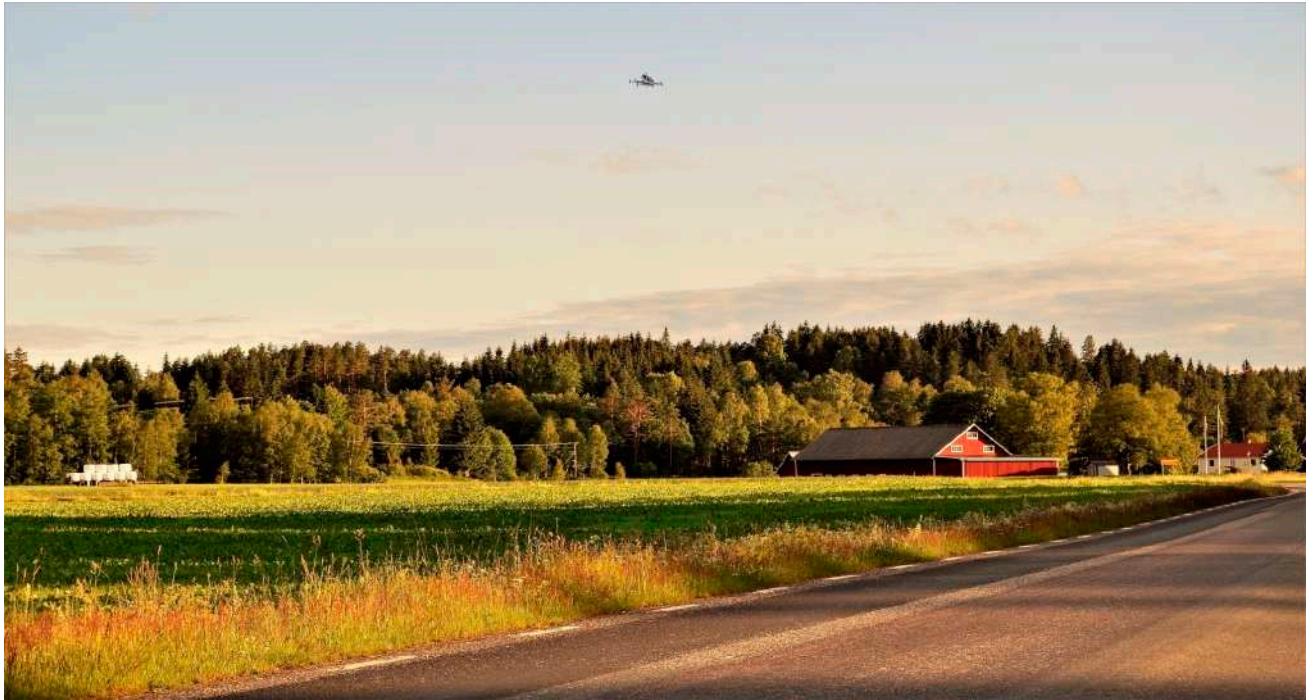

What is the level of Visual pollution in this image?

Is this level of visual pollution tolerable?

- ☐ Yes  
☐ No

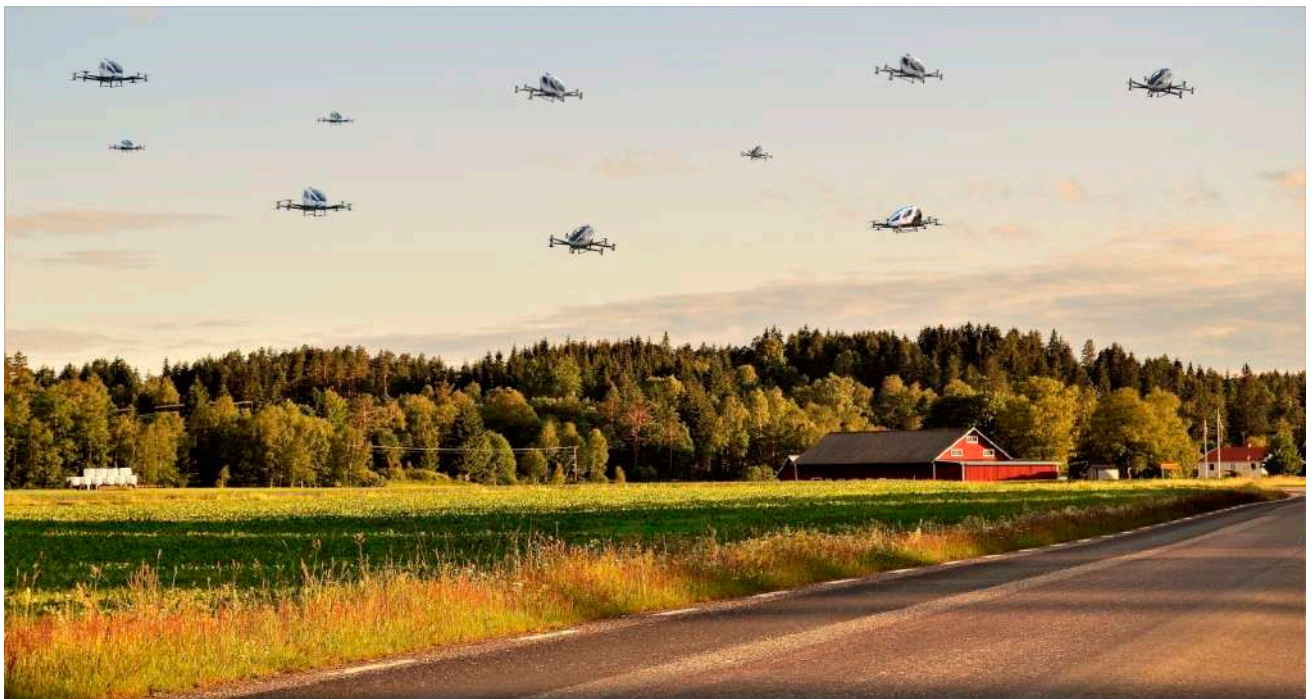

What is the level of Visual pollution in this image?

Look at the  
picture and  
select

Is this level of visual pollution tolerable?

- ☐ Yes  
☐ No

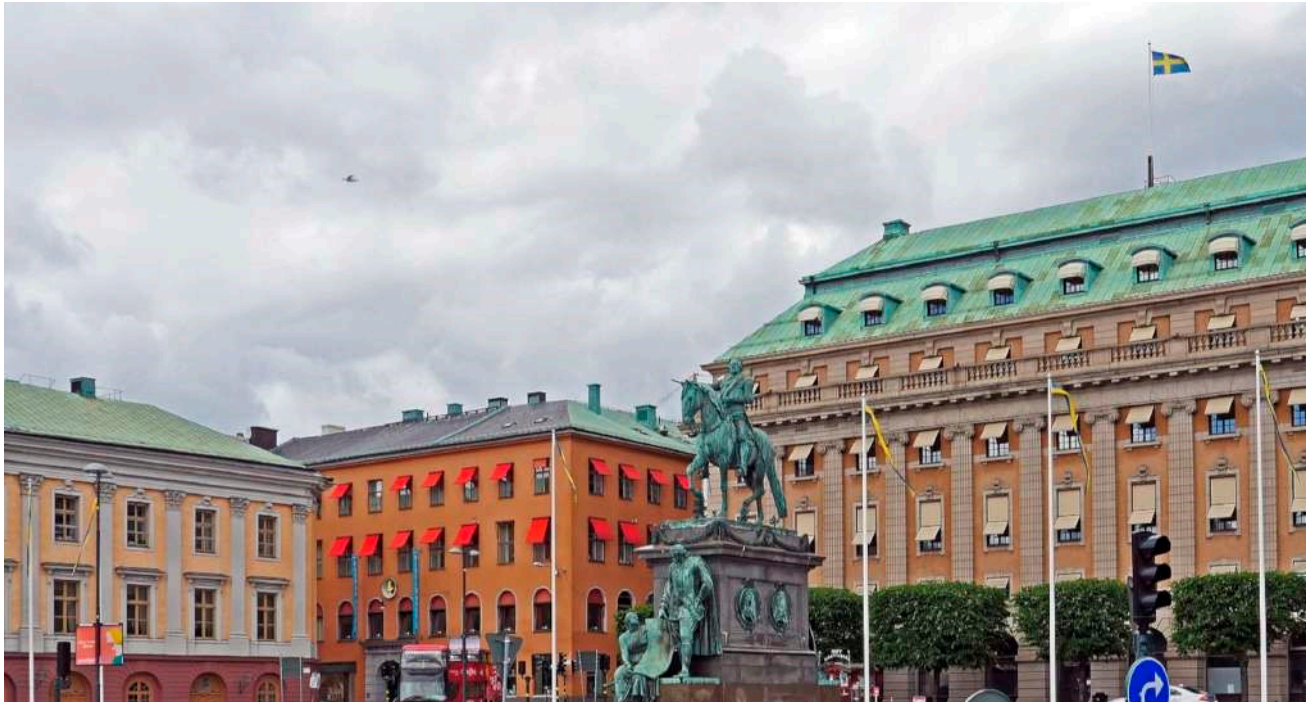

What is the level of Visual pollution in this image?

Is this level of visual pollution tolerable?

- ☐ Yes  
☐ No

Look at the  
picture and  
select

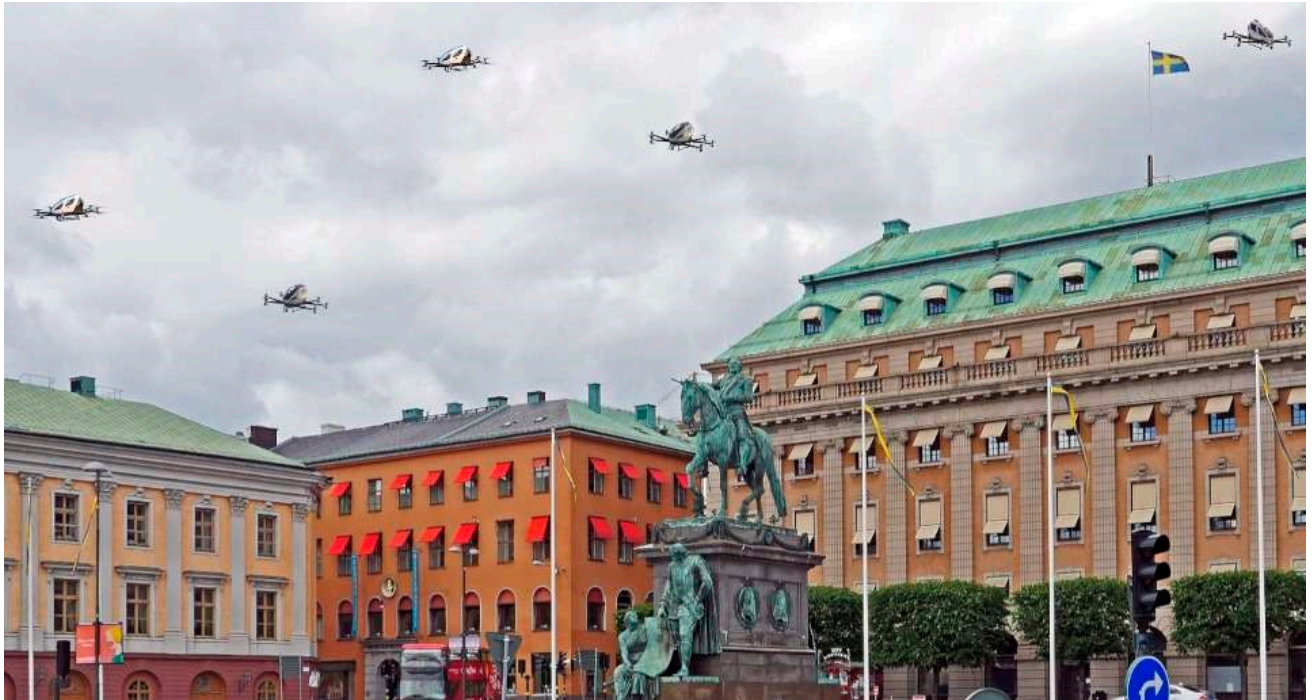

What is the level of Visual pollution in this image?

Is this level of visual pollution tolerable?

- ☐ Yes  
☐ No

Look at the  
picture and  
select

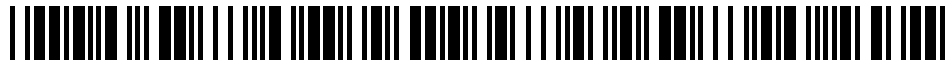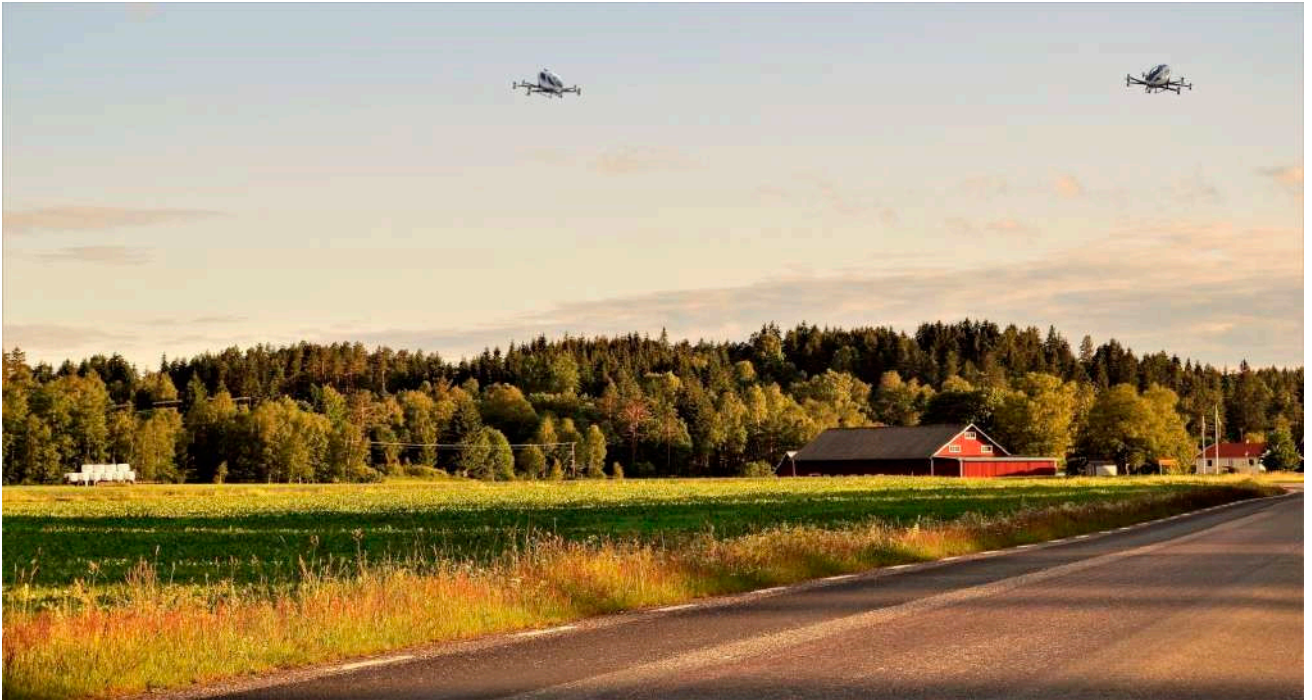

What is the level of Visual pollution in this image?

Is this level of visual pollution tolerable?

- ☐ Yes  
☐ No

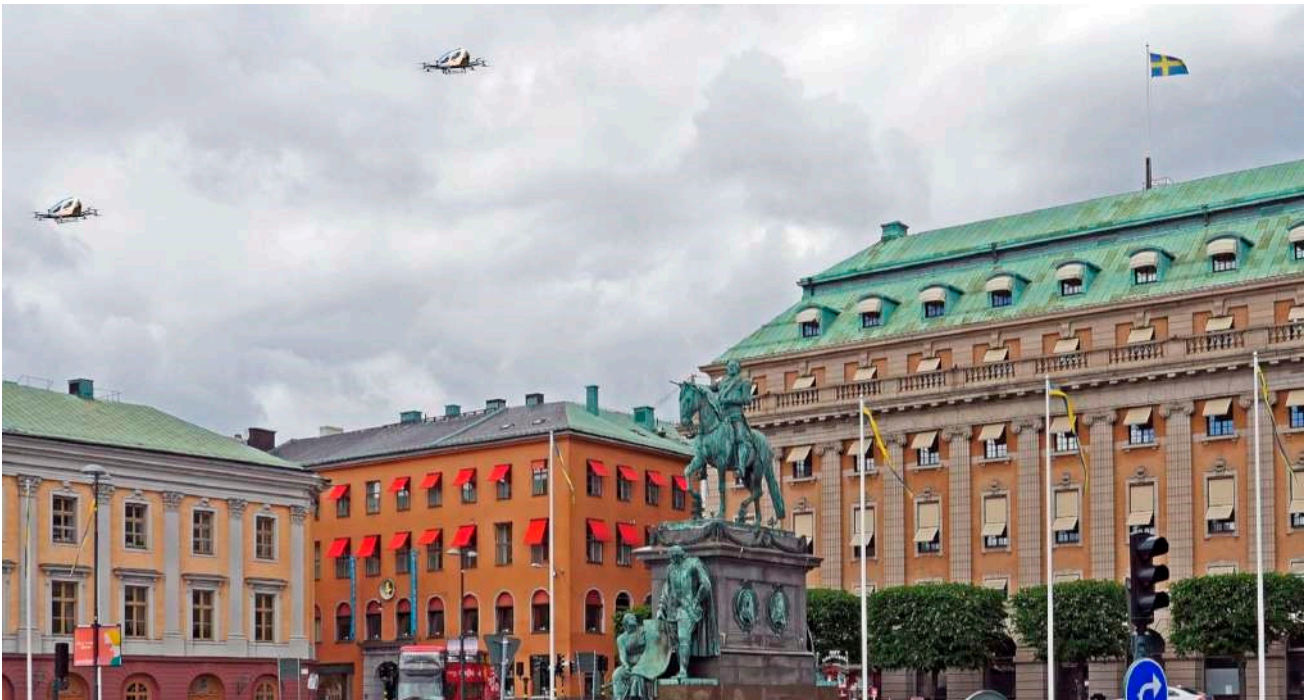

What is the level of Visual pollution in this image?

Look at the  
picture and  
select

Is this level of visual pollution tolerable?

- ☐ Yes  
☐ No

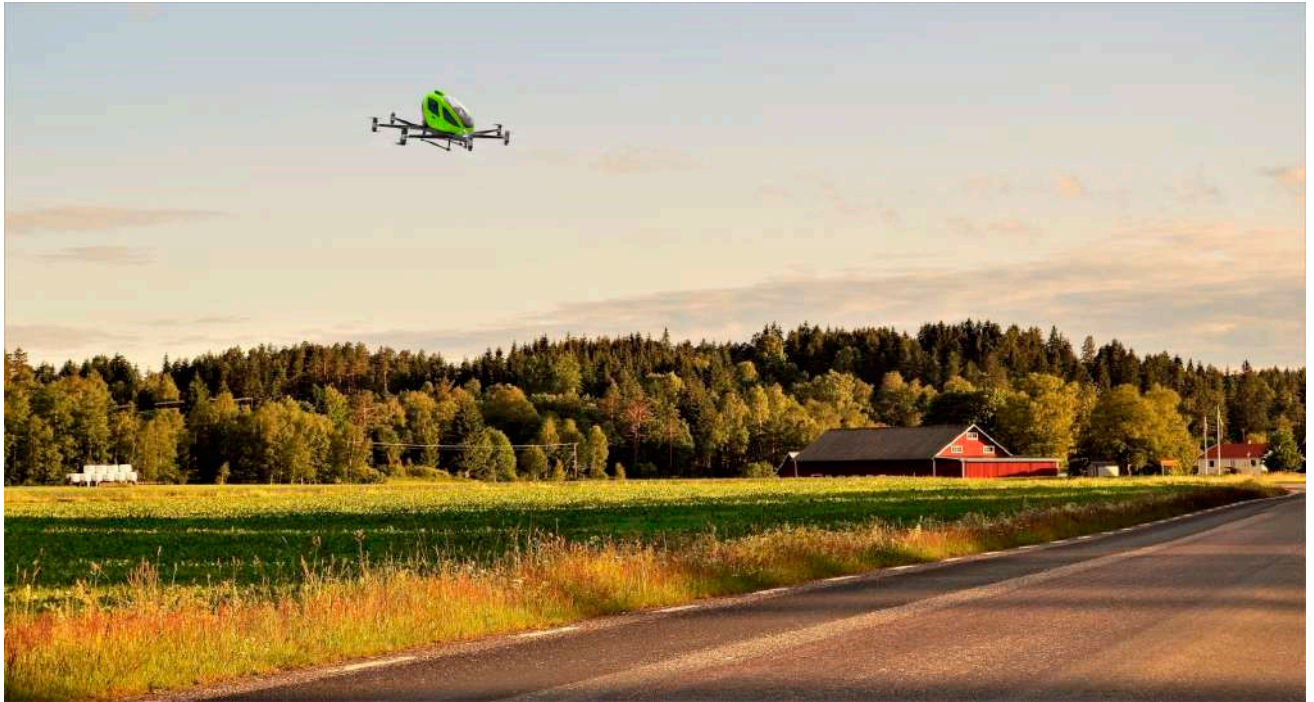

What is the level of Visual pollution in this image?

Is this level of visual pollution tolerable?

- ☐ Yes  
☐ No

Look at the  
picture and  
select

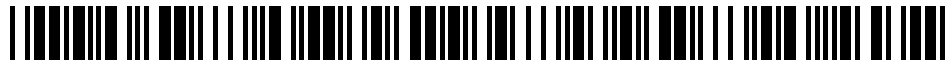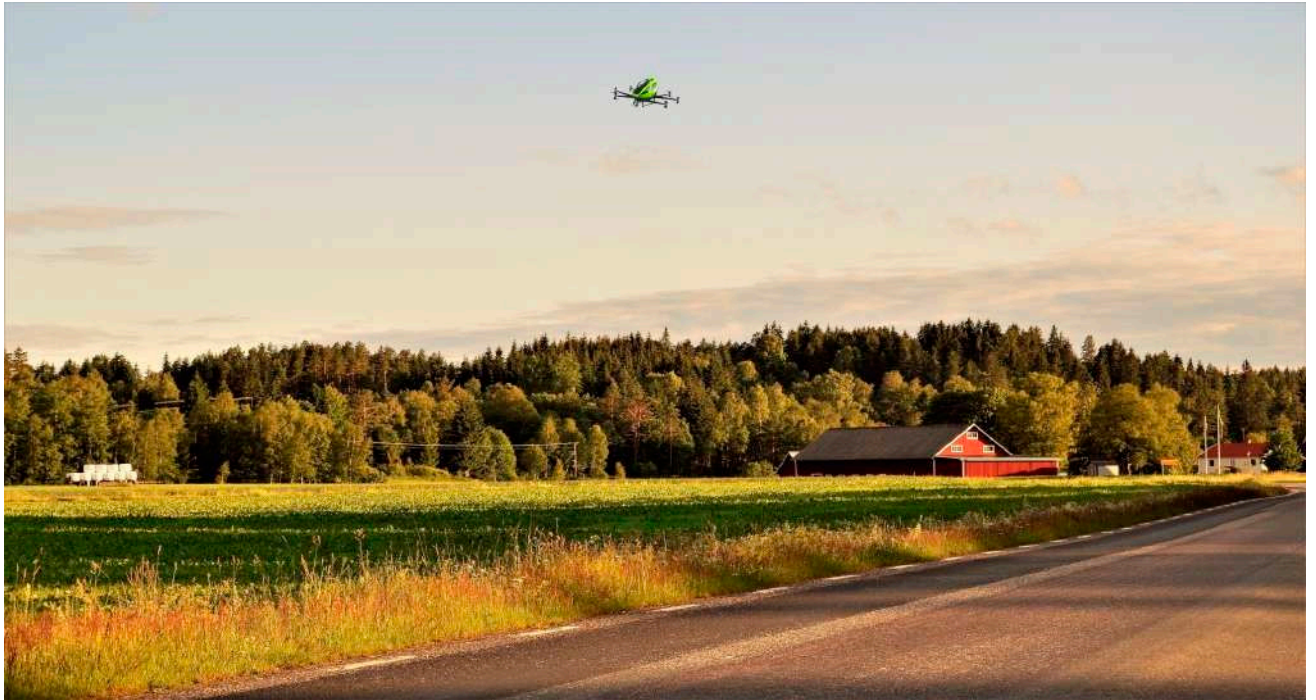

What is the level of Visual pollution in this image?

Is this level of visual pollution tolerable?

- ☐ Yes  
☐ No

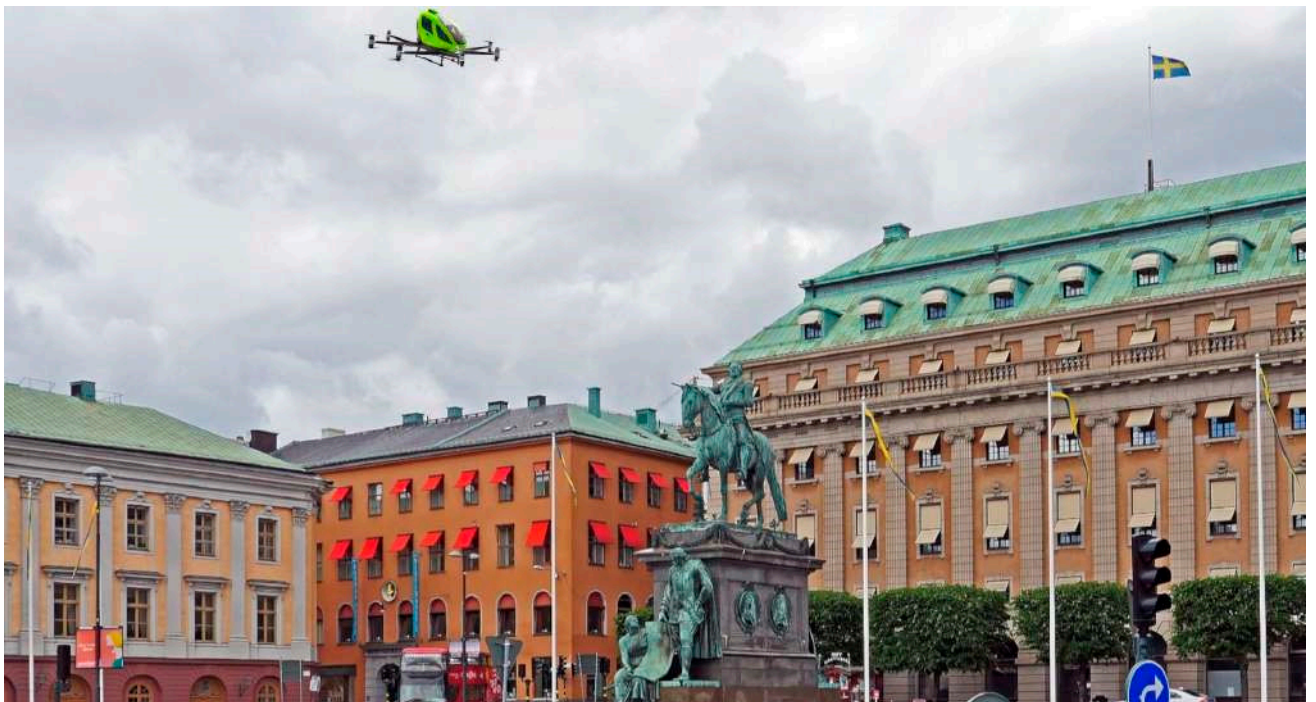

What is the level of Visual pollution in this image?

Look at the  
picture and  
select

Is this level of visual pollution tolerable?

- ☐ Yes  
☐ No

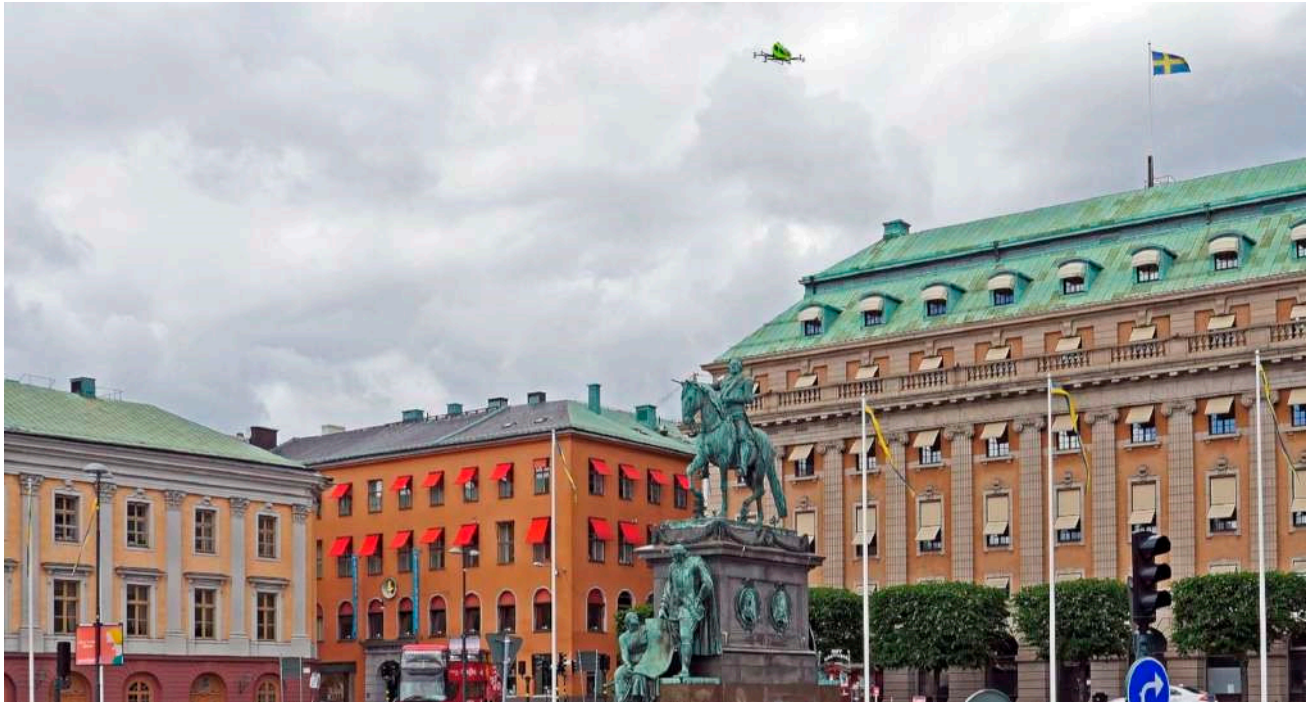

What is the level of Visual pollution in this image?

Is this level of visual pollution tolerable?

- ☐ Yes  
☐ No

Look at the  
picture and  
select

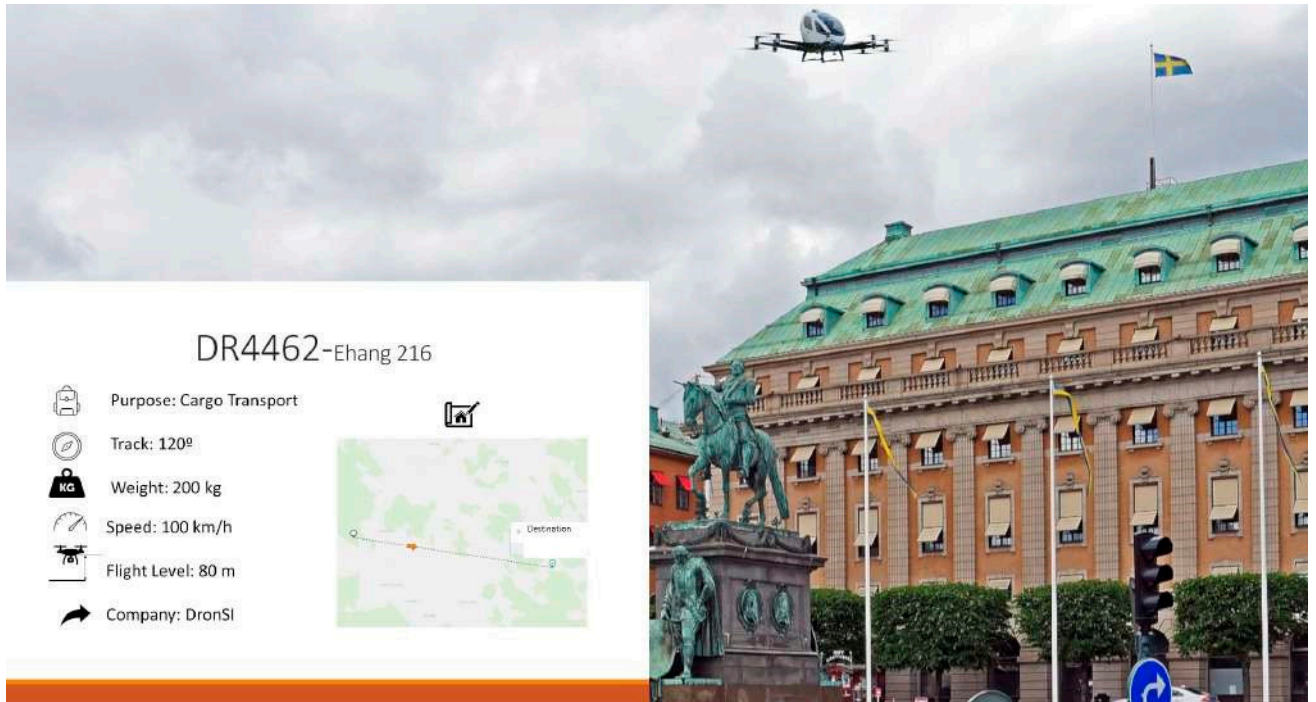

What is the level of Visual pollution in this image?

Is this level of visual pollution tolerable?

- ☐ Yes
- ☐ No

Look at the  
picture and  
select

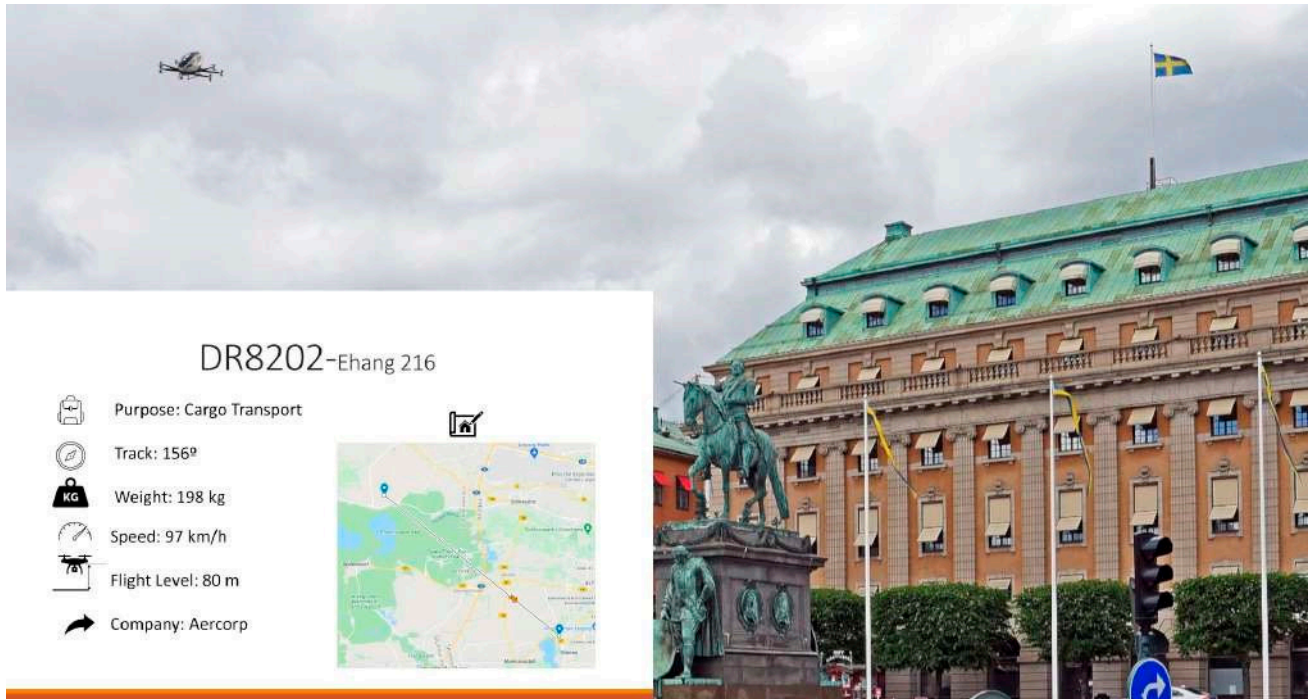

Is this level of visual pollution tolerable?

- ☐ Yes
- ☐ No

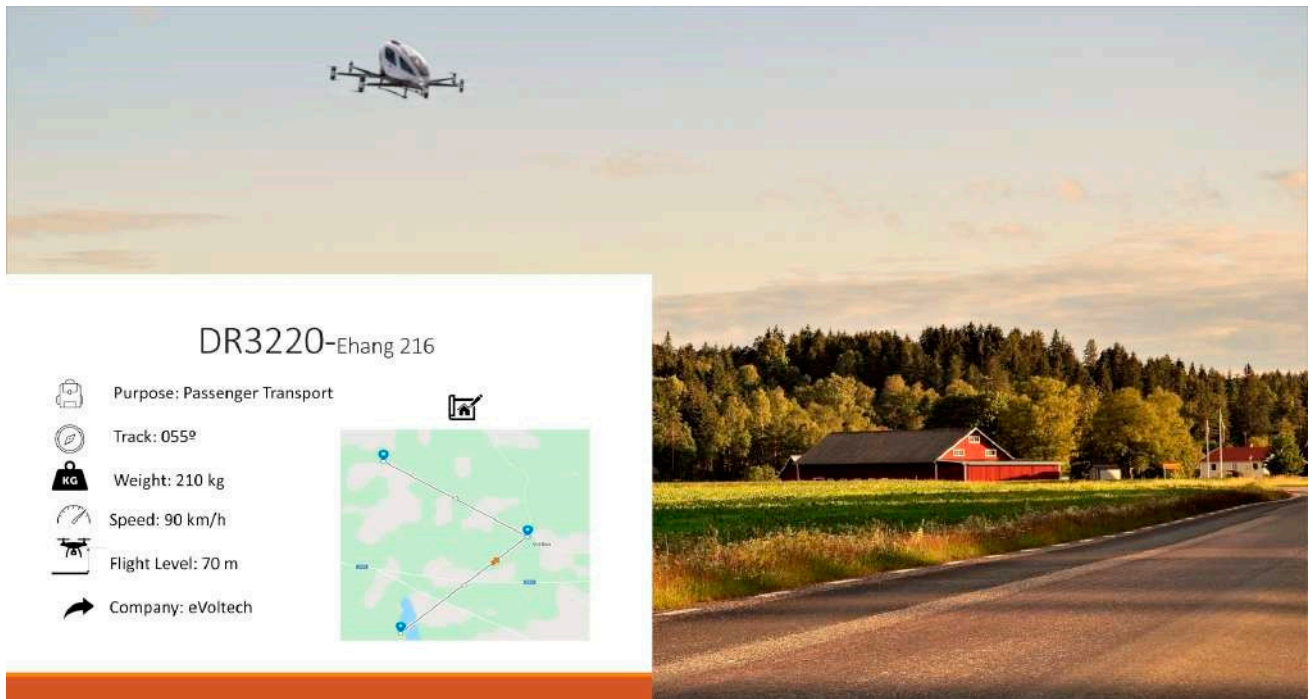

Look at the  
picture and  
select

Is this level of visual pollution tolerable?

- ☐ Yes  
☐ No

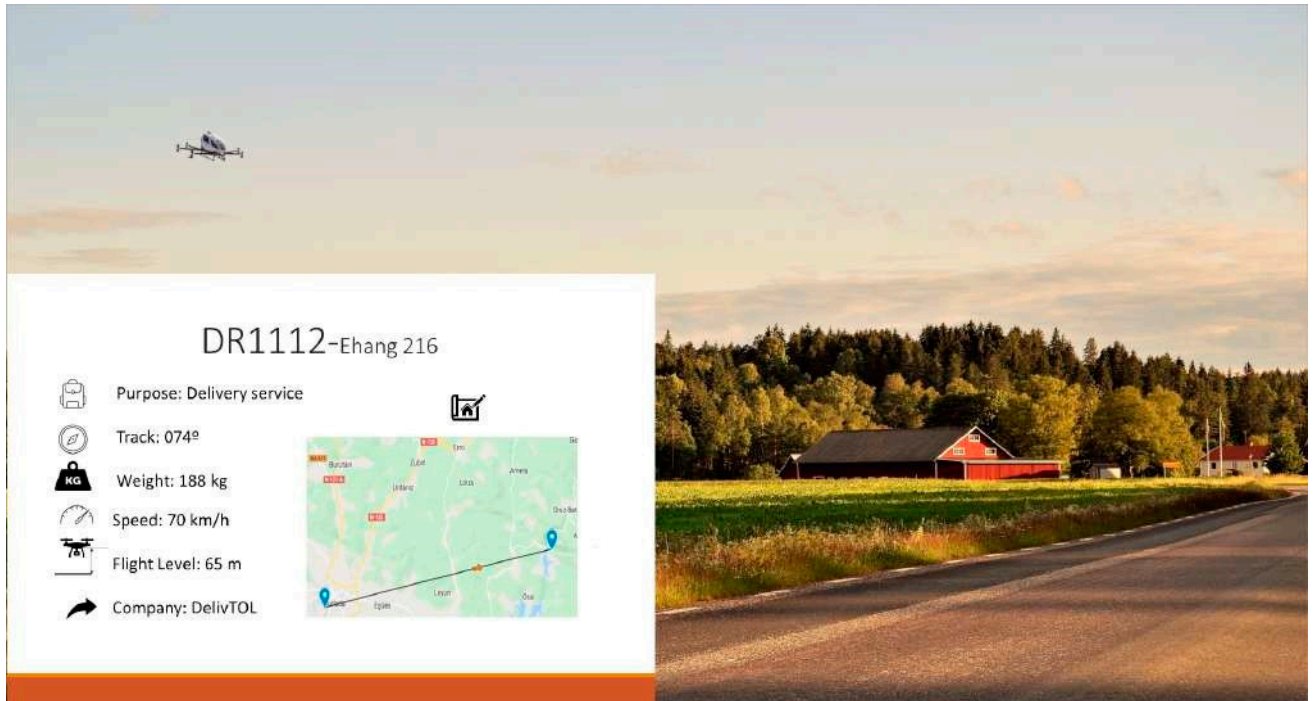

What is the level of Visual pollution in this image?

Is this level of visual pollution tolerable?

- ☐ Yes  
☐ No

Thank you!

Your information is very valuable!
