# Supplementary material
Source: MDPI journal article supplement (https://www.mdpi.com/2504-446X/7/6/396)
Supplement: s1 [file s1]

Archive with 2 entries (2 files):
- S1-Questionnaire.pdf
- S2-Questionnare_response.xlsx
