# Supplementary material
Source: MDPI journal article supplement (https://www.mdpi.com/2504-446X/7/6/396)
Supplement: s1 [file s1 › S2-Questionnare_response.xlsx]

## Sheet: Data
Picture	Environement	Distance from the clests drone	Number	Purpose	Awareness	ID	Age	Opinion	Knowledge	Rank	Tolerable
1	Rural	0	0	0	0	1	4	1	2	3	1
2	Rural	80	1	No EMS	No	1	4	1	2	4	1
3	Urban	0	0	0	0	1	4	1	2	4	1
4	Urban	80	1	No EMS	No	1	4	1	2	5	1
5	Urban	160	1	No EMS	No	1	4	1	2	5	1
6	Urban	160	10	No EMS	No	1	4	1	2	8	0
7	Rural	80	2	No EMS	No	1	4	1	2	6	1
8	Rural	640	1	No EMS	No	1	4	1	2	3	1
9	Urban	320	1	No EMS	No	1	4	1	2	4	1
10	Rural	160	1	No EMS	No	1	4	1	2	5	1
11	Urban	80	2	No EMS	No	1	4	1	2	7	0
12	Rural	160	5	No EMS	No	1	4	1	2	8	0
13	Urban	320	2	No EMS	No	1	4	1	2	7	1
14	Rural	80	3	No EMS	No	1	4	1	2	8	0
15	Rural	320	1	No EMS	No	1	4	1	2	4	1
16	Rural	160	10	No EMS	No	1	4	1	2	9	0
17	Urban	640	1	No EMS	No	1	4	1	2	4	1
18	Urban	160	5	No EMS	No	1	4	1	2	8	0
19	Rural	160	2	No EMS	No	1	4	1	2	5	1
20	Urban	160	2	No EMS	No	1	4	1	2	7	1
21	Rural	80	1	EMS	No	1	4	1	2	6	1
22	Rural	160	1	EMS	No	1	4	1	2	5	1
23	Urban	80	1	EMS	No	1	4	1	2	6	1
24	Urban	160	1	EMS	No	1	4	1	2	6	1
25	Urban	80	1	No EMS	Yes	1	4	1	2	6	1
26	Urban	160	1	No EMS	Yes	1	4	1	2	6	1
27	Rural	80	1	No EMS	Yes	1	4	1	2	6	1
28	Rural	160	1	No EMS	Yes	1	4	1	2	6	1
1	Rural	0	0	0	0	2	2	1	3	1	1
2	Rural	80	1	No EMS	No	2	2	1	3	2	1
3	Urban	0	0	0	0	2	2	1	3	5	1
4	Urban	80	1	No EMS	No	2	2	1	3	5	1
5	Urban	160	1	No EMS	No	2	2	1	3	5	1
6	Urban	160	10	No EMS	No	2	2	1	3	7	1
7	Rural	80	2	No EMS	No	2	2	1	3	6	1
8	Rural	640	1	No EMS	No	2	2	1	3	2	1
9	Urban	320	1	No EMS	No	2	2	1	3	4	1
10	Rural	160	1	No EMS	No	2	2	1	3	4	1
11	Urban	80	2	No EMS	No	2	2	1	3	6	1
12	Rural	160	5	No EMS	No	2	2	1	3	8	1
13	Urban	320	2	No EMS	No	2	2	1	3	3	1
14	Rural	80	3	No EMS	No	2	2	1	3	8	1
15	Rural	320	1	No EMS	No	2	2	1	3	3	1
16	Rural	160	10	No EMS	No	2	2	1	3	9	1
17	Urban	640	1	No EMS	No	2	2	1	3	4	1
18	Urban	160	5	No EMS	No	2	2	1	3	5	1
19	Rural	160	2	No EMS	No	2	2	1	3	3	1
20	Urban	160	2	No EMS	No	2	2	1	3	4	1
21	Rural	80	1	EMS	No	2	2	1	3	3	1
22	Rural	160	1	EMS	No	2	2	1	3	3	1
23	Urban	80	1	EMS	No	2	2	1	3	5	1
24	Urban	160	1	EMS	No	2	2	1	3	5	1
25	Urban	80	1	No EMS	Yes	2	2	1	3	9	0
26	Urban	160	1	No EMS	Yes	2	2	1	3	10	0
27	Rural	80	1	No EMS	Yes	2	2	1	3	10	0
28	Rural	160	1	No EMS	Yes	2	2	1	3	8	1
1	Rural	0	0	0	0	3	2	0	3	0	1
2	Rural	80	1	No EMS	No	3	2	0	3	1	1
3	Urban	0	0	0	0	3	2	0	3	1	1
4	Urban	80	1	No EMS	No	3	2	0	3	3	1
5	Urban	160	1	No EMS	No	3	2	0	3	10	1
6	Urban	160	10	No EMS	No	3	2	0	3	8	0
7	Rural	80	2	No EMS	No	3	2	0	3	6	1
8	Rural	640	1	No EMS	No	3	2	0	3	2	1
9	Urban	320	1	No EMS	No	3	2	0	3	2	1
10	Rural	160	1	No EMS	No	3	2	0	3	2	1
11	Urban	80	2	No EMS	No	3	2	0	3	6	1
12	Rural	160	5	No EMS	No	3	2	0	3	7	0
13	Urban	320	2	No EMS	No	3	2	0	3	1	1
14	Rural	80	3	No EMS	No	3	2	0	3	9	0
15	Rural	320	1	No EMS	No	3	2	0	3	2	1
16	Rural	160	10	No EMS	No	3	2	0	3	10	0
17	Urban	640	1	No EMS	No	3	2	0	3	0	1
18	Urban	160	5	No EMS	No	3	2	0	3	7	1
19	Rural	160	2	No EMS	No	3	2	0	3	3	1
20	Urban	160	2	No EMS	No	3	2	0	3	8	1
21	Rural	80	1	EMS	No	3	2	0	3	6	1
22	Rural	160	1	EMS	No	3	2	0	3	2	1
23	Urban	80	1	EMS	No	3	2	0	3	2	1
24	Urban	160	1	EMS	No	3	2	0	3	1	1
25	Urban	80	1	No EMS	Yes	3	2	0	3	3	1
26	Urban	160	1	No EMS	Yes	3	2	0	3	2	1
27	Rural	80	1	No EMS	Yes	3	2	0	3	3	1
28	Rural	160	1	No EMS	Yes	3	2	0	3	8	1
1	Rural	0	0	0	0	4	2	1	3	3	1
2	Rural	80	1	No EMS	No	4	2	1	3	4	1
3	Urban	0	0	0	0	4	2	1	3	3	1
4	Urban	80	1	No EMS	No	4	2	1	3	5	1
5	Urban	160	1	No EMS	No	4	2	1	3	3	1
6	Urban	160	10	No EMS	No	4	2	1	3	10	0
7	Rural	80	2	No EMS	No	4	2	1	3	6	1
8	Rural	640	1	No EMS	No	4	2	1	3	4	1
9	Urban	320	1	No EMS	No	4	2	1	3	4	1
10	Rural	160	1	No EMS	No	4	2	1	3	5	1
11	Urban	80	2	No EMS	No	4	2	1	3	5	1
12	Rural	160	5	No EMS	No	4	2	1	3	8	0
13	Urban	320	2	No EMS	No	4	2	1	3	5	1
14	Rural	80	3	No EMS	No	4	2	1	3	8	0
15	Rural	320	1	No EMS	No	4	2	1	3	3	1
16	Rural	160	10	No EMS	No	4	2	1	3	10	0
17	Urban	640	1	No EMS	No	4	2	1	3	5	1
18	Urban	160	5	No EMS	No	4	2	1	3	9	0
19	Rural	160	2	No EMS	No	4	2	1	3	3	1
20	Urban	160	2	No EMS	No	4	2	1	3	4	1
21	Rural	80	1	EMS	No	4	2	1	3	4	1
22	Rural	160	1	EMS	No	4	2	1	3	4	1
23	Urban	80	1	EMS	No	4	2	1	3	5	1
24	Urban	160	1	EMS	No	4	2	1	3	3	1
25	Urban	80	1	No EMS	Yes	4	2	1	3	4	1
26	Urban	160	1	No EMS	Yes	4	2	1	3	4	1
27	Rural	80	1	No EMS	Yes	4	2	1	3	3	1
28	Rural	160	1	No EMS	Yes	4	2	1	3	2	1
1	Rural	0	0	0	0	5	4	1	2	10	1
2	Rural	80	1	No EMS	No	5	4	1	2	10	1
3	Urban	0	0	0	0	5	4	1	2	2	1
4	Urban	80	1	No EMS	No	5	4	1	2	4	1
5	Urban	160	1	No EMS	No	5	4	1	2	3	1
6	Urban	160	10	No EMS	No	5	4	1	2	8	0
7	Rural	80	2	No EMS	No	5	4	1	2	10	0
8	Rural	640	1	No EMS	No	5	4	1	2	2	1
9	Urban	320	1	No EMS	No	5	4	1	2	2	1
10	Rural	160	1	No EMS	No	5	4	1	2	2	1
11	Urban	80	2	No EMS	No	5	4	1	2	6	0
12	Rural	160	5	No EMS	No	5	4	1	2	8	0
13	Urban	320	2	No EMS	No	5	4	1	2	4	1
14	Rural	80	3	No EMS	No	5	4	1	2	7	0
15	Rural	320	1	No EMS	No	5	4	1	2	2	1
16	Rural	160	10	No EMS	No	5	4	1	2	9	0
17	Urban	640	1	No EMS	No	5	4	1	2	2	1
18	Urban	160	5	No EMS	No	5	4	1	2	8	0
19	Rural	160	2	No EMS	No	5	4	1	2	5	1
20	Urban	160	2	No EMS	No	5	4	1	2	5	1
21	Rural	80	1	EMS	No	5	4	1	2	10	1
22	Rural	160	1	EMS	No	5	4	1	2	10	1
23	Urban	80	1	EMS	No	5	4	1	2	10	1
24	Urban	160	1	EMS	No	5	4	1	2	2	1
25	Urban	80	1	No EMS	Yes	5	4	1	2	3	1
26	Urban	160	1	No EMS	Yes	5	4	1	2	3	1
27	Rural	80	1	No EMS	Yes	5	4	1	2	3	1
28	Rural	160	1	No EMS	Yes	5	4	1	2	3	1
1	Rural	0	0	0	0	6	2	1	2	2	1
2	Rural	80	1	No EMS	No	6	2	1	2	2	1
3	Urban	0	0	0	0	6	2	1	2	5	1
4	Urban	80	1	No EMS	No	6	2	1	2	5	1
5	Urban	160	1	No EMS	No	6	2	1	2	4	1
6	Urban	160	10	No EMS	No	6	2	1	2	6	0
7	Rural	80	2	No EMS	No	6	2	1	2	4	1
8	Rural	640	1	No EMS	No	6	2	1	2	2	1
9	Urban	320	1	No EMS	No	6	2	1	2	3	1
10	Rural	160	1	No EMS	No	6	2	1	2	10	1
11	Urban	80	2	No EMS	No	6	2	1	2	4	1
12	Rural	160	5	No EMS	No	6	2	1	2	5	1
13	Urban	320	2	No EMS	No	6	2	1	2	3	1
14	Rural	80	3	No EMS	No	6	2	1	2	5	1
15	Rural	320	1	No EMS	No	6	2	1	2	2	1
16	Rural	160	10	No EMS	No	6	2	1	2	5	1
17	Urban	640	1	No EMS	No	6	2	1	2	3	1
18	Urban	160	5	No EMS	No	6	2	1	2	5	1
19	Rural	160	2	No EMS	No	6	2	1	2	3	1
20	Urban	160	2	No EMS	No	6	2	1	2	5	1
21	Rural	80	1	EMS	No	6	2	1	2	3	1
22	Rural	160	1	EMS	No	6	2	1	2	2	1
23	Urban	80	1	EMS	No	6	2	1	2	5	1
24	Urban	160	1	EMS	No	6	2	1	2	4	1
25	Urban	80	1	No EMS	Yes	6	2	1	2	5	1
26	Urban	160	1	No EMS	Yes	6	2	1	2	4	1
27	Rural	80	1	No EMS	Yes	6	2	1	2	3	1
28	Rural	160	1	No EMS	Yes	6	2	1	2	2	1
1	Rural	0	0	0	0	7	2	1	3	2	1
2	Rural	80	1	No EMS	No	7	2	1	3	3	1
3	Urban	0	0	0	0	7	2	1	3	7	1
4	Urban	80	1	No EMS	No	7	2	1	3	8	0
5	Urban	160	1	No EMS	No	7	2	1	3	8	1
6	Urban	160	10	No EMS	No	7	2	1	3	10	0
7	Rural	80	2	No EMS	No	7	2	1	3	5	0
8	Rural	640	1	No EMS	No	7	2	1	3	3	1
9	Urban	320	1	No EMS	No	7	2	1	3	7	1
10	Rural	160	1	No EMS	No	7	2	1	3	4	1
11	Urban	80	2	No EMS	No	7	2	1	3	10	0
12	Rural	160	5	No EMS	No	7	2	1	3	7	0
13	Urban	320	2	No EMS	No	7	2	1	3	8	1
14	Rural	80	3	No EMS	No	7	2	1	3	6	0
15	Rural	320	1	No EMS	No	7	2	1	3	3	1
16	Rural	160	10	No EMS	No	7	2	1	3	7	0
17	Urban	640	1	No EMS	No	7	2	1	3	7	1
18	Urban	160	5	No EMS	No	7	2	1	3	9	0
19	Rural	160	2	No EMS	No	7	2	1	3	4	1
20	Urban	160	2	No EMS	No	7	2	1	3	7	1
21	Rural	80	1	EMS	No	7	2	1	3	5	1
22	Rural	160	1	EMS	No	7	2	1	3	4	1
23	Urban	80	1	EMS	No	7	2	1	3	8	1
24	Urban	160	1	EMS	No	7	2	1	3	7	1
25	Urban	80	1	No EMS	Yes	7	2	1	3	9	1
26	Urban	160	1	No EMS	Yes	7	2	1	3	8	1
27	Rural	80	1	No EMS	Yes	7	2	1	3	7	1
28	Rural	160	1	No EMS	Yes	7	2	1	3	7	1
1	Rural	0	0	0	0	8	4	1	2	1	1
2	Rural	80	1	No EMS	No	8	4	1	2	0	1
3	Urban	0	0	0	0	8	4	1	2	4	1
4	Urban	80	1	No EMS	No	8	4	1	2	3	1
5	Urban	160	1	No EMS	No	8	4	1	2	3	1
6	Urban	160	10	No EMS	No	8	4	1	2	5	0
7	Rural	80	2	No EMS	No	8	4	1	2	3	1
8	Rural	640	1	No EMS	No	8	4	1	2	1	1
9	Urban	320	1	No EMS	No	8	4	1	2	3	0
10	Rural	160	1	No EMS	No	8	4	1	2	1	1
11	Urban	80	2	No EMS	No	8	4	1	2	4	0
12	Rural	160	5	No EMS	No	8	4	1	2	4	0
13	Urban	320	2	No EMS	No	8	4	1	2	3	0
14	Rural	80	3	No EMS	No	8	4	1	2	3	0
15	Rural	320	1	No EMS	No	8	4	1	2	2	1
16	Rural	160	10	No EMS	No	8	4	1	2	10	0
17	Urban	640	1	No EMS	No	8	4	1	2	3	1
18	Urban	160	5	No EMS	No	8	4	1	2	6	0
19	Rural	160	2	No EMS	No	8	4	1	2	3	1
20	Urban	160	2	No EMS	No	8	4	1	2	4	0
21	Rural	80	1	EMS	No	8	4	1	2	3	1
22	Rural	160	1	EMS	No	8	4	1	2	1	1
23	Urban	80	1	EMS	No	8	4	1	2	4	1
24	Urban	160	1	EMS	No	8	4	1	2	3	1
25	Urban	80	1	No EMS	Yes	8	4	1	2	4	0
26	Urban	160	1	No EMS	Yes	8	4	1	2	2	1
27	Rural	80	1	No EMS	Yes	8	4	1	2	2	1
28	Rural	160	1	No EMS	Yes	8	4	1	2	2	1
1	Rural	0	0	0	0	9	2	2	1	0	1
2	Rural	80	1	No EMS	No	9	2	2	1	4	1
3	Urban	0	0	0	0	9	2	2	1	0	1
4	Urban	80	1	No EMS	No	9	2	2	1	3	1
5	Urban	160	1	No EMS	No	9	2	2	1	1	1
6	Urban	160	10	No EMS	No	9	2	2	1	8	0
7	Rural	80	2	No EMS	No	9	2	2	1	7	0
8	Rural	640	1	No EMS	No	9	2	2	1	0	1
9	Urban	320	1	No EMS	No	9	2	2	1	0	1
10	Rural	160	1	No EMS	No	9	2	2	1	2	1
11	Urban	80	2	No EMS	No	9	2	2	1	7	0
12	Rural	160	5	No EMS	No	9	2	2	1	8	0
13	Urban	320	2	No EMS	No	9	2	2	1	5	1
14	Rural	80	3	No EMS	No	9	2	2	1	8	0
15	Rural	320	1	No EMS	No	9	2	2	1	1	1
16	Rural	160	10	No EMS	No	9	2	2	1	9	0
17	Urban	640	1	No EMS	No	9	2	2	1	0	1
18	Urban	160	5	No EMS	No	9	2	2	1	8	0
19	Rural	160	2	No EMS	No	9	2	2	1	7	1
20	Urban	160	2	No EMS	No	9	2	2	1	2	1
21	Rural	80	1	EMS	No	9	2	2	1	8	0
22	Rural	160	1	EMS	No	9	2	2	1	4	1
23	Urban	80	1	EMS	No	9	2	2	1	7	1
24	Urban	160	1	EMS	No	9	2	2	1	2	1
25	Urban	80	1	No EMS	Yes	9	2	2	1	6	0
26	Urban	160	1	No EMS	Yes	9	2	2	1	3	1
27	Rural	80	1	No EMS	Yes	9	2	2	1	7	0
28	Rural	160	1	No EMS	Yes	9	2	2	1	5	1
1	Rural	0	0	0	0	10	2	1	2	1	1
2	Rural	80	1	No EMS	No	10	2	1	2	5	1
3	Urban	0	0	0	0	10	2	1	2	6	1
4	Urban	80	1	No EMS	No	10	2	1	2	7	1
5	Urban	160	1	No EMS	No	10	2	1	2	6	1
6	Urban	160	10	No EMS	No	10	2	1	2	9	0
7	Rural	80	2	No EMS	No	10	2	1	2	7	0
8	Rural	640	1	No EMS	No	10	2	1	2	2	1
9	Urban	320	1	No EMS	No	10	2	1	2	6	1
10	Rural	160	1	No EMS	No	10	2	1	2	5	1
11	Urban	80	2	No EMS	No	10	2	1	2	9	0
12	Rural	160	5	No EMS	No	10	2	1	2	10	0
13	Urban	320	2	No EMS	No	10	2	1	2	8	1
14	Rural	80	3	No EMS	No	10	2	1	2	9	0
15	Rural	320	1	No EMS	No	10	2	1	2	6	1
16	Rural	160	10	No EMS	No	10	2	1	2	10	0
17	Urban	640	1	No EMS	No	10	2	1	2	5	1
18	Urban	160	5	No EMS	No	10	2	1	2	9	0
19	Rural	160	2	No EMS	No	10	2	1	2	8	0
20	Urban	160	2	No EMS	No	10	2	1	2	8	1
21	Rural	80	1	EMS	No	10	2	1	2	7	0
22	Rural	160	1	EMS	No	10	2	1	2	6	1
23	Urban	80	1	EMS	No	10	2	1	2	7	1
24	Urban	160	1	EMS	No	10	2	1	2	6	1
25	Urban	80	1	No EMS	Yes	10	2	1	2	7	0
26	Urban	160	1	No EMS	Yes	10	2	1	2	6	1
27	Rural	80	1	No EMS	Yes	10	2	1	2	6	0
28	Rural	160	1	No EMS	Yes	10	2	1	2	5	1
1	Rural	0	0	0	0	11	4	1	2	0	1
2	Rural	80	1	No EMS	No	11	4	1	2	3	1
3	Urban	0	0	0	0	11	4	1	2	3	1
4	Urban	80	1	No EMS	No	11	4	1	2	4	1
5	Urban	160	1	No EMS	No	11	4	1	2	3	1
6	Urban	160	10	No EMS	No	11	4	1	2	9	0
7	Rural	80	2	No EMS	No	11	4	1	2	10	1
8	Rural	640	1	No EMS	No	11	4	1	2	2	1
9	Urban	320	1	No EMS	No	11	4	1	2	1	1
10	Rural	160	1	No EMS	No	11	4	1	2	2	1
11	Urban	80	2	No EMS	No	11	4	1	2	5	1
12	Rural	160	5	No EMS	No	11	4	1	2	10	0
13	Urban	320	2	No EMS	No	11	4	1	2	10	1
14	Rural	80	3	No EMS	No	11	4	1	2	8	0
15	Rural	320	1	No EMS	No	11	4	1	2	1	1
16	Rural	160	10	No EMS	No	11	4	1	2	9	0
17	Urban	640	1	No EMS	No	11	4	1	2	1	1
18	Urban	160	5	No EMS	No	11	4	1	2	5	0
19	Rural	160	2	No EMS	No	11	4	1	2	4	1
20	Urban	160	2	No EMS	No	11	4	1	2	3	1
21	Rural	80	1	EMS	No	11	4	1	2	2	1
22	Rural	160	1	EMS	No	11	4	1	2	2	1
23	Urban	80	1	EMS	No	11	4	1	2	4	1
24	Urban	160	1	EMS	No	11	4	1	2	3	1
25	Urban	80	1	No EMS	Yes	11	4	1	2	4	0
26	Urban	160	1	No EMS	Yes	11	4	1	2	3	1
27	Rural	80	1	No EMS	Yes	11	4	1	2	3	1
28	Rural	160	1	No EMS	Yes	11	4	1	2	2	1
1	Rural	0	0	0	0	12	2	1	3	0	1
2	Rural	80	1	No EMS	No	12	2	1	3	4	1
3	Urban	0	0	0	0	12	2	1	3	10	1
4	Urban	80	1	No EMS	No	12	2	1	3	3	1
5	Urban	160	1	No EMS	No	12	2	1	3	2	1
6	Urban	160	10	No EMS	No	12	2	1	3	10	0
7	Rural	80	2	No EMS	No	12	2	1	3	7	1
8	Rural	640	1	No EMS	No	12	2	1	3	1	1
9	Urban	320	1	No EMS	No	12	2	1	3	2	1
10	Rural	160	1	No EMS	No	12	2	1	3	2	1
11	Urban	80	2	No EMS	No	12	2	1	3	6	0
12	Rural	160	5	No EMS	No	12	2	1	3	8	0
13	Urban	320	2	No EMS	No	12	2	1	3	1	1
14	Rural	80	3	No EMS	No	12	2	1	3	7	0
15	Rural	320	1	No EMS	No	12	2	1	3	1	1
16	Rural	160	10	No EMS	No	12	2	1	3	10	0
17	Urban	640	1	No EMS	No	12	2	1	3	1	1
18	Urban	160	5	No EMS	No	12	2	1	3	7	0
19	Rural	160	2	No EMS	No	12	2	1	3	4	1
20	Urban	160	2	No EMS	No	12	2	1	3	3	1
21	Rural	80	1	EMS	No	12	2	1	3	3	1
22	Rural	160	1	EMS	No	12	2	1	3	3	1
23	Urban	80	1	EMS	No	12	2	1	3	4	1
24	Urban	160	1	EMS	No	12	2	1	3	1	1
25	Urban	80	1	No EMS	Yes	12	2	1	3	3	1
26	Urban	160	1	No EMS	Yes	12	2	1	3	1	1
27	Rural	80	1	No EMS	Yes	12	2	1	3	2	1
28	Rural	160	1	No EMS	Yes	12	2	1	3	1	1
1	Rural	0	0	0	0	13	2	1	2	4	0
2	Rural	80	1	No EMS	No	13	2	1	2	8	1
3	Urban	0	0	0	0	13	2	1	2	10	0
4	Urban	80	1	No EMS	No	13	2	1	2	10	1
5	Urban	160	1	No EMS	No	13	2	1	2	10	1
6	Urban	160	10	No EMS	No	13	2	1	2	9	1
7	Rural	80	2	No EMS	No	13	2	1	2	5	0
8	Rural	640	1	No EMS	No	13	2	1	2	0	1
9	Urban	320	1	No EMS	No	13	2	1	2	1	1
10	Rural	160	1	No EMS	No	13	2	1	2	3	1
11	Urban	80	2	No EMS	No	13	2	1	2	6	0
12	Rural	160	5	No EMS	No	13	2	1	2	7	0
13	Urban	320	2	No EMS	No	13	2	1	2	7	1
14	Rural	80	3	No EMS	No	13	2	1	2	10	0
15	Rural	320	1	No EMS	No	13	2	1	2	3	0
16	Rural	160	10	No EMS	No	13	2	1	2	10	0
17	Urban	640	1	No EMS	No	13	2	1	2	3	1
18	Urban	160	5	No EMS	No	13	2	1	2	5	1
19	Rural	160	2	No EMS	No	13	2	1	2	3	0
20	Urban	160	2	No EMS	No	13	2	1	2	2	1
21	Rural	80	1	EMS	No	13	2	1	2	3	1
22	Rural	160	1	EMS	No	13	2	1	2	3	1
23	Urban	80	1	EMS	No	13	2	1	2	4	1
24	Urban	160	1	EMS	No	13	2	1	2	5	1
25	Urban	80	1	No EMS	Yes	13	2	1	2	10	0
26	Urban	160	1	No EMS	Yes	13	2	1	2	10	0
27	Rural	80	1	No EMS	Yes	13	2	1	2	10	0
28	Rural	160	1	No EMS	Yes	13	2	1	2	10	0
1	Rural	0	0	0	0	14	2	2	1	0	1
2	Rural	80	1	No EMS	No	14	2	2	1	9	0
3	Urban	0	0	0	0	14	2	2	1	0	1
4	Urban	80	1	No EMS	No	14	2	2	1	6	1
5	Urban	160	1	No EMS	No	14	2	2	1	6	1
6	Urban	160	10	No EMS	No	14	2	2	1	10	0
7	Rural	80	2	No EMS	No	14	2	2	1	10	0
8	Rural	640	1	No EMS	No	14	2	2	1	4	0
9	Urban	320	1	No EMS	No	14	2	2	1	5	1
10	Rural	160	1	No EMS	No	14	2	2	1	5	0
11	Urban	80	2	No EMS	No	14	2	2	1	5	1
12	Rural	160	5	No EMS	No	14	2	2	1	10	0
13	Urban	320	2	No EMS	No	14	2	2	1	4	1
14	Rural	80	3	No EMS	No	14	2	2	1	10	0
15	Rural	320	1	No EMS	No	14	2	2	1	3	0
16	Rural	160	10	No EMS	No	14	2	2	1	10	0
17	Urban	640	1	No EMS	No	14	2	2	1	1	1
18	Urban	160	5	No EMS	No	14	2	2	1	6	0
19	Rural	160	2	No EMS	No	14	2	2	1	6	0
20	Urban	160	2	No EMS	No	14	2	2	1	6	1
21	Rural	80	1	EMS	No	14	2	2	1	5	1
22	Rural	160	1	EMS	No	14	2	2	1	3	1
23	Urban	80	1	EMS	No	14	2	2	1	2	1
24	Urban	160	1	EMS	No	14	2	2	1	1	1
25	Urban	80	1	No EMS	Yes	14	2	2	1	2	1
26	Urban	160	1	No EMS	Yes	14	2	2	1	3	1
27	Rural	80	1	No EMS	Yes	14	2	2	1	7	0
28	Rural	160	1	No EMS	Yes	14	2	2	1	5	0
1	Rural	0	0	0	0	15	2	1	2	3	1
2	Rural	80	1	No EMS	No	15	2	1	2	5	1
3	Urban	0	0	0	0	15	2	1	2	3	1
4	Urban	80	1	No EMS	No	15	2	1	2	5	1
5	Urban	160	1	No EMS	No	15	2	1	2	4	1
6	Urban	160	10	No EMS	No	15	2	1	2	8	0
7	Rural	80	2	No EMS	No	15	2	1	2	6	1
8	Rural	640	1	No EMS	No	15	2	1	2	3	1
9	Urban	320	1	No EMS	No	15	2	1	2	2	1
10	Rural	160	1	No EMS	No	15	2	1	2	4	1
11	Urban	80	2	No EMS	No	15	2	1	2	7	0
12	Rural	160	5	No EMS	No	15	2	1	2	8	0
13	Urban	320	2	No EMS	No	15	2	1	2	5	1
14	Rural	80	3	No EMS	No	15	2	1	2	8	0
15	Rural	320	1	No EMS	No	15	2	1	2	3	1
16	Rural	160	10	No EMS	No	15	2	1	2	9	0
17	Urban	640	1	No EMS	No	15	2	1	2	2	1
18	Urban	160	5	No EMS	No	15	2	1	2	9	0
19	Rural	160	2	No EMS	No	15	2	1	2	7	0
20	Urban	160	2	No EMS	No	15	2	1	2	7	0
21	Rural	80	1	EMS	No	15	2	1	2	5	1
22	Rural	160	1	EMS	No	15	2	1	2	5	1
23	Urban	80	1	EMS	No	15	2	1	2	4	1
24	Urban	160	1	EMS	No	15	2	1	2	3	1
25	Urban	80	1	No EMS	Yes	15	2	1	2	5	1
26	Urban	160	1	No EMS	Yes	15	2	1	2	5	1
27	Rural	80	1	No EMS	Yes	15	2	1	2	4	1
28	Rural	160	1	No EMS	Yes	15	2	1	2	4	1
1	Rural	0	0	0	0	16	2	1	2	0	1
2	Rural	80	1	No EMS	No	16	2	1	2	4	1
3	Urban	0	0	0	0	16	2	1	2	1	1
4	Urban	80	1	No EMS	No	16	2	1	2	3	1
5	Urban	160	1	No EMS	No	16	2	1	2	1	1
6	Urban	160	10	No EMS	No	16	2	1	2	7	0
7	Rural	80	2	No EMS	No	16	2	1	2	6	1
8	Rural	640	1	No EMS	No	16	2	1	2	0	1
9	Urban	320	1	No EMS	No	16	2	1	2	1	1
10	Rural	160	1	No EMS	No	16	2	1	2	2	1
11	Urban	80	2	No EMS	No	16	2	1	2	6	1
12	Rural	160	5	No EMS	No	16	2	1	2	8	0
13	Urban	320	2	No EMS	No	16	2	1	2	1	1
14	Rural	80	3	No EMS	No	16	2	1	2	8	0
15	Rural	320	1	No EMS	No	16	2	1	2	1	1
16	Rural	160	10	No EMS	No	16	2	1	2	9	0
17	Urban	640	1	No EMS	No	16	2	1	2	0	1
18	Urban	160	5	No EMS	No	16	2	1	2	8	0
19	Rural	160	2	No EMS	No	16	2	1	2	3	1
20	Urban	160	2	No EMS	No	16	2	1	2	3	1
21	Rural	80	1	EMS	No	16	2	1	2	3	1
22	Rural	160	1	EMS	No	16	2	1	2	2	1
23	Urban	80	1	EMS	No	16	2	1	2	3	1
24	Urban	160	1	EMS	No	16	2	1	2	1	1
25	Urban	80	1	No EMS	Yes	16	2	1	2	6	0
26	Urban	160	1	No EMS	Yes	16	2	1	2	6	0
27	Rural	80	1	No EMS	Yes	16	2	1	2	7	0
28	Rural	160	1	No EMS	Yes	16	2	1	2	7	0
1	Rural	0	0	0	0	17	4	1	2	5	1
2	Rural	80	1	No EMS	No	17	4	1	2	7	1
3	Urban	0	0	0	0	17	4	1	2	4	1
4	Urban	80	1	No EMS	No	17	4	1	2	5	1
5	Urban	160	1	No EMS	No	17	4	1	2	5	1
6	Urban	160	10	No EMS	No	17	4	1	2	10	0
7	Rural	80	2	No EMS	No	17	4	1	2	7	1
8	Rural	640	1	No EMS	No	17	4	1	2	5	1
9	Urban	320	1	No EMS	No	17	4	1	2	5	1
10	Rural	160	1	No EMS	No	17	4	1	2	6	1
11	Urban	80	2	No EMS	No	17	4	1	2	10	1
12	Rural	160	5	No EMS	No	17	4	1	2	9	0
13	Urban	320	2	No EMS	No	17	4	1	2	10	1
14	Rural	80	3	No EMS	No	17	4	1	2	8	0
15	Rural	320	1	No EMS	No	17	4	1	2	7	1
16	Rural	160	10	No EMS	No	17	4	1	2	10	0
17	Urban	640	1	No EMS	No	17	4	1	2	5	1
18	Urban	160	5	No EMS	No	17	4	1	2	8	0
19	Rural	160	2	No EMS	No	17	4	1	2	6	1
20	Urban	160	2	No EMS	No	17	4	1	2	6	1
21	Rural	80	1	EMS	No	17	4	1	2	7	1
22	Rural	160	1	EMS	No	17	4	1	2	6	1
23	Urban	80	1	EMS	No	17	4	1	2	6	1
24	Urban	160	1	EMS	No	17	4	1	2	5	1
25	Urban	80	1	No EMS	Yes	17	4	1	2	7	1
26	Urban	160	1	No EMS	Yes	17	4	1	2	6	1
27	Rural	80	1	No EMS	Yes	17	4	1	2	7	1
28	Rural	160	1	No EMS	Yes	17	4	1	2	7	1
1	Rural	0	0	0	0	18	2	1	2	7	0
2	Rural	80	1	No EMS	No	18	2	1	2	9	0
3	Urban	0	0	0	0	18	2	1	2	2	1
4	Urban	80	1	No EMS	No	18	2	1	2	5	1
5	Urban	160	1	No EMS	No	18	2	1	2	1	1
6	Urban	160	10	No EMS	No	18	2	1	2	9	0
7	Rural	80	2	No EMS	No	18	2	1	2	8	0
8	Rural	640	1	No EMS	No	18	2	1	2	7	0
9	Urban	320	1	No EMS	No	18	2	1	2	7	1
10	Rural	160	1	No EMS	No	18	2	1	2	8	0
11	Urban	80	2	No EMS	No	18	2	1	2	6	0
12	Rural	160	5	No EMS	No	18	2	1	2	10	0
13	Urban	320	2	No EMS	No	18	2	1	2	7	0
14	Rural	80	3	No EMS	No	18	2	1	2	9	0
15	Rural	320	1	No EMS	No	18	2	1	2	7	0
16	Rural	160	10	No EMS	No	18	2	1	2	10	0
17	Urban	640	1	No EMS	No	18	2	1	2	2	1
18	Urban	160	5	No EMS	No	18	2	1	2	8	0
19	Rural	160	2	No EMS	No	18	2	1	2	7	0
20	Urban	160	2	No EMS	No	18	2	1	2	6	1
21	Rural	80	1	EMS	No	18	2	1	2	7	0
22	Rural	160	1	EMS	No	18	2	1	2	4	1
23	Urban	80	1	EMS	No	18	2	1	2	3	1
24	Urban	160	1	EMS	No	18	2	1	2	2	1
25	Urban	80	1	No EMS	Yes	18	2	1	2	1	1
26	Urban	160	1	No EMS	Yes	18	2	1	2	2	1
27	Rural	80	1	No EMS	Yes	18	2	1	2	5	1
28	Rural	160	1	No EMS	Yes	18	2	1	2	4	1
1	Rural	0	0	0	0	19	2	1	2	2	1
2	Rural	80	1	No EMS	No	19	2	1	2	4	1
3	Urban	0	0	0	0	19	2	1	2	8	1
4	Urban	80	1	No EMS	No	19	2	1	2	3	1
5	Urban	160	1	No EMS	No	19	2	1	2	3	1
6	Urban	160	10	No EMS	No	19	2	1	2	10	0
7	Rural	80	2	No EMS	No	19	2	1	2	4	0
8	Rural	640	1	No EMS	No	19	2	1	2	3	1
9	Urban	320	1	No EMS	No	19	2	1	2	4	1
10	Rural	160	1	No EMS	No	19	2	1	2	3	1
11	Urban	80	2	No EMS	No	19	2	1	2	4	1
12	Rural	160	5	No EMS	No	19	2	1	2	7	0
13	Urban	320	2	No EMS	No	19	2	1	2	10	1
14	Rural	80	3	No EMS	No	19	2	1	2	4	0
15	Rural	320	1	No EMS	No	19	2	1	2	3	1
16	Rural	160	10	No EMS	No	19	2	1	2	8	0
17	Urban	640	1	No EMS	No	19	2	1	2	2	1
18	Urban	160	5	No EMS	No	19	2	1	2	8	0
19	Rural	160	2	No EMS	No	19	2	1	2	3	1
20	Urban	160	2	No EMS	No	19	2	1	2	10	1
21	Rural	80	1	EMS	No	19	2	1	2	3	1
22	Rural	160	1	EMS	No	19	2	1	2	3	1
23	Urban	80	1	EMS	No	19	2	1	2	3	1
24	Urban	160	1	EMS	No	19	2	1	2	3	1
25	Urban	80	1	No EMS	Yes	19	2	1	2	5	0
26	Urban	160	1	No EMS	Yes	19	2	1	2	7	0
27	Rural	80	1	No EMS	Yes	19	2	1	2	7	0
28	Rural	160	1	No EMS	Yes	19	2	1	2	6	0
1	Rural	0	0	0	0	20	2	1	3	1	1
2	Rural	80	1	No EMS	No	20	2	1	3	2	1
3	Urban	0	0	0	0	20	2	1	3	2	1
4	Urban	80	1	No EMS	No	20	2	1	3	3	1
5	Urban	160	1	No EMS	No	20	2	1	3	2	1
6	Urban	160	10	No EMS	No	20	2	1	3	2	0
7	Rural	80	2	No EMS	No	20	2	1	3	4	1
8	Rural	640	1	No EMS	No	20	2	1	3	1	1
9	Urban	320	1	No EMS	No	20	2	1	3	2	1
10	Rural	160	1	No EMS	No	20	2	1	3	2	1
11	Urban	80	2	No EMS	No	20	2	1	3	3	1
12	Rural	160	5	No EMS	No	20	2	1	3	5	1
13	Urban	320	2	No EMS	No	20	2	1	3	3	1
14	Rural	80	3	No EMS	No	20	2	1	3	4	1
15	Rural	320	1	No EMS	No	20	2	1	3	2	1
16	Rural	160	10	No EMS	No	20	2	1	3	7	0
17	Urban	640	1	No EMS	No	20	2	1	3	2	1
18	Urban	160	5	No EMS	No	20	2	1	3	7	0
19	Rural	160	2	No EMS	No	20	2	1	3	3	1
20	Urban	160	2	No EMS	No	20	2	1	3	4	1
21	Rural	80	1	EMS	No	20	2	1	3	3	1
22	Rural	160	1	EMS	No	20	2	1	3	2	1
23	Urban	80	1	EMS	No	20	2	1	3	3	1
24	Urban	160	1	EMS	No	20	2	1	3	2	1
25	Urban	80	1	No EMS	Yes	20	2	1	3	5	1
26	Urban	160	1	No EMS	Yes	20	2	1	3	4	1
27	Rural	80	1	No EMS	Yes	20	2	1	3	4	1
28	Rural	160	1	No EMS	Yes	20	2	1	3	3	1
1	Rural	0	0	0	0	21	4	1	2	0	1
2	Rural	80	1	No EMS	No	21	4	1	2	0	1
3	Urban	0	0	0	0	21	4	1	2	0	1
4	Urban	80	1	No EMS	No	21	4	1	2	0	1
5	Urban	160	1	No EMS	No	21	4	1	2	0	1
6	Urban	160	10	No EMS	No	21	4	1	2	8	0
7	Rural	80	2	No EMS	No	21	4	1	2	2	1
8	Rural	640	1	No EMS	No	21	4	1	2	0	1
9	Urban	320	1	No EMS	No	21	4	1	2	0	1
10	Rural	160	1	No EMS	No	21	4	1	2	0	1
11	Urban	80	2	No EMS	No	21	4	1	2	0	1
12	Rural	160	5	No EMS	No	21	4	1	2	5	0
13	Urban	320	2	No EMS	No	21	4	1	2	0	1
14	Rural	80	3	No EMS	No	21	4	1	2	3	0
15	Rural	320	1	No EMS	No	21	4	1	2	1	1
16	Rural	160	10	No EMS	No	21	4	1	2	8	0
17	Urban	640	1	No EMS	No	21	4	1	2	0	1
18	Urban	160	5	No EMS	No	21	4	1	2	7	0
19	Rural	160	2	No EMS	No	21	4	1	2	1	1
20	Urban	160	2	No EMS	No	21	4	1	2	0	1
21	Rural	80	1	EMS	No	21	4	1	2	1	1
22	Rural	160	1	EMS	No	21	4	1	2	1	1
23	Urban	80	1	EMS	No	21	4	1	2	1	1
24	Urban	160	1	EMS	No	21	4	1	2	1	1
25	Urban	80	1	No EMS	Yes	21	4	1	2	0	1
26	Urban	160	1	No EMS	Yes	21	4	1	2	0	1
27	Rural	80	1	No EMS	Yes	21	4	1	2	1	1
28	Rural	160	1	No EMS	Yes	21	4	1	2	1	1
1	Rural	0	0	0	0	22	4	1	2	0	1
2	Rural	80	1	No EMS	No	22	4	1	2	3	1
3	Urban	0	0	0	0	22	4	1	2	0	1
4	Urban	80	1	No EMS	No	22	4	1	2	3	1
5	Urban	160	1	No EMS	No	22	4	1	2	1	1
6	Urban	160	10	No EMS	No	22	4	1	2	7	0
7	Rural	80	2	No EMS	No	22	4	1	2	5	1
8	Rural	640	1	No EMS	No	22	4	1	2	0	1
9	Urban	320	1	No EMS	No	22	4	1	2	1	1
10	Rural	160	1	No EMS	No	22	4	1	2	1	1
11	Urban	80	2	No EMS	No	22	4	1	2	4	0
12	Rural	160	5	No EMS	No	22	4	1	2	5	0
13	Urban	320	2	No EMS	No	22	4	1	2	2	1
14	Rural	80	3	No EMS	No	22	4	1	2	7	0
15	Rural	320	1	No EMS	No	22	4	1	2	0	1
16	Rural	160	10	No EMS	No	22	4	1	2	8	0
17	Urban	640	1	No EMS	No	22	4	1	2	0	1
18	Urban	160	5	No EMS	No	22	4	1	2	5	0
19	Rural	160	2	No EMS	No	22	4	1	2	2	1
20	Urban	160	2	No EMS	No	22	4	1	2	2	1
21	Rural	80	1	EMS	No	22	4	1	2	3	1
22	Rural	160	1	EMS	No	22	4	1	2	1	1
23	Urban	80	1	EMS	No	22	4	1	2	2	1
24	Urban	160	1	EMS	No	22	4	1	2	0	1
25	Urban	80	1	No EMS	Yes	22	4	1	2	2	1
26	Urban	160	1	No EMS	Yes	22	4	1	2	0	1
27	Rural	80	1	No EMS	Yes	22	4	1	2	2	1
28	Rural	160	1	No EMS	Yes	22	4	1	2	0	1
1	Rural	0	0	0	0	23	4	1	1	0	1
2	Rural	80	1	No EMS	No	23	4	1	1	3	1
3	Urban	0	0	0	0	23	4	1	1	0	1
4	Urban	80	1	No EMS	No	23	4	1	1	10	0
5	Urban	160	1	No EMS	No	23	4	1	1	5	1
6	Urban	160	10	No EMS	No	23	4	1	1	10	0
7	Rural	80	2	No EMS	No	23	4	1	1	7	1
8	Rural	640	1	No EMS	No	23	4	1	1	0	1
9	Urban	320	1	No EMS	No	23	4	1	1	1	1
10	Rural	160	1	No EMS	No	23	4	1	1	2	1
11	Urban	80	2	No EMS	No	23	4	1	1	9	0
12	Rural	160	5	No EMS	No	23	4	1	1	10	0
13	Urban	320	2	No EMS	No	23	4	1	1	3	0
14	Rural	80	3	No EMS	No	23	4	1	1	7	0
15	Rural	320	1	No EMS	No	23	4	1	1	2	1
16	Rural	160	10	No EMS	No	23	4	1	1	10	0
17	Urban	640	1	No EMS	No	23	4	1	1	1	1
18	Urban	160	5	No EMS	No	23	4	1	1	8	0
19	Rural	160	2	No EMS	No	23	4	1	1	3	1
20	Urban	160	2	No EMS	No	23	4	1	1	8	0
21	Rural	80	1	EMS	No	23	4	1	1	3	0
22	Rural	160	1	EMS	No	23	4	1	1	2	1
23	Urban	80	1	EMS	No	23	4	1	1	4	0
24	Urban	160	1	EMS	No	23	4	1	1	2	1
25	Urban	80	1	No EMS	Yes	23	4	1	1	6	0
26	Urban	160	1	No EMS	Yes	23	4	1	1	2	0
27	Rural	80	1	No EMS	Yes	23	4	1	1	4	1
28	Rural	160	1	No EMS	Yes	23	4	1	1	1	1
1	Rural	0	0	0	0	24	2	1	3	0	1
2	Rural	80	1	No EMS	No	24	2	1	3	6	1
3	Urban	0	0	0	0	24	2	1	3	0	1
4	Urban	80	1	No EMS	No	24	2	1	3	5	1
5	Urban	160	1	No EMS	No	24	2	1	3	3	1
6	Urban	160	10	No EMS	No	24	2	1	3	8	0
7	Rural	80	2	No EMS	No	24	2	1	3	8	1
8	Rural	640	1	No EMS	No	24	2	1	3	1	1
9	Urban	320	1	No EMS	No	24	2	1	3	1	1
10	Rural	160	1	No EMS	No	24	2	1	3	3	1
11	Urban	80	2	No EMS	No	24	2	1	3	6	1
12	Rural	160	5	No EMS	No	24	2	1	3	9	0
13	Urban	320	2	No EMS	No	24	2	1	3	2	1
14	Rural	80	3	No EMS	No	24	2	1	3	9	0
15	Rural	320	1	No EMS	No	24	2	1	3	2	1
16	Rural	160	10	No EMS	No	24	2	1	3	10	0
17	Urban	640	1	No EMS	No	24	2	1	3	1	1
18	Urban	160	5	No EMS	No	24	2	1	3	7	0
19	Rural	160	2	No EMS	No	24	2	1	3	6	1
20	Urban	160	2	No EMS	No	24	2	1	3	4	1
21	Rural	80	1	EMS	No	24	2	1	3	5	1
22	Rural	160	1	EMS	No	24	2	1	3	3	1
23	Urban	80	1	EMS	No	24	2	1	3	4	1
24	Urban	160	1	EMS	No	24	2	1	3	2	1
25	Urban	80	1	No EMS	Yes	24	2	1	3	5	1
26	Urban	160	1	No EMS	Yes	24	2	1	3	3	1
27	Rural	80	1	No EMS	Yes	24	2	1	3	6	1
28	Rural	160	1	No EMS	Yes	24	2	1	3	5	1
1	Rural	0	0	0	0	25	4	1	2	1	1
2	Rural	80	1	No EMS	No	25	4	1	2	3	1
3	Urban	0	0	0	0	25	4	1	2	1	1
4	Urban	80	1	No EMS	No	25	4	1	2	3	1
5	Urban	160	1	No EMS	No	25	4	1	2	2	1
6	Urban	160	10	No EMS	No	25	4	1	2	6	0
7	Rural	80	2	No EMS	No	25	4	1	2	5	1
8	Rural	640	1	No EMS	No	25	4	1	2	1	1
9	Urban	320	1	No EMS	No	25	4	1	2	2	1
10	Rural	160	1	No EMS	No	25	4	1	2	2	1
11	Urban	80	2	No EMS	No	25	4	1	2	4	1
12	Rural	160	5	No EMS	No	25	4	1	2	6	0
13	Urban	320	2	No EMS	No	25	4	1	2	3	1
14	Rural	80	3	No EMS	No	25	4	1	2	6	0
15	Rural	320	1	No EMS	No	25	4	1	2	2	1
16	Rural	160	10	No EMS	No	25	4	1	2	8	0
17	Urban	640	1	No EMS	No	25	4	1	2	1	1
18	Urban	160	5	No EMS	No	25	4	1	2	5	1
19	Rural	160	2	No EMS	No	25	4	1	2	3	1
20	Urban	160	2	No EMS	No	25	4	1	2	3	1
21	Rural	80	1	EMS	No	25	4	1	2	3	1
22	Rural	160	1	EMS	No	25	4	1	2	2	1
23	Urban	80	1	EMS	No	25	4	1	2	3	1
24	Urban	160	1	EMS	No	25	4	1	2	2	1
25	Urban	80	1	No EMS	Yes	25	4	1	2	6	0
26	Urban	160	1	No EMS	Yes	25	4	1	2	8	0
27	Rural	80	1	No EMS	Yes	25	4	1	2	8	0
28	Rural	160	1	No EMS	Yes	25	4	1	2	8	0
1	Rural	0	0	0	0	26	3	0	2	0	1
2	Rural	80	1	No EMS	No	26	3	0	2	2	1
3	Urban	0	0	0	0	26	3	0	2	0	1
4	Urban	80	1	No EMS	No	26	3	0	2	3	1
5	Urban	160	1	No EMS	No	26	3	0	2	2	1
6	Urban	160	10	No EMS	No	26	3	0	2	8	0
7	Rural	80	2	No EMS	No	26	3	0	2	5	1
8	Rural	640	1	No EMS	No	26	3	0	2	0	1
9	Urban	320	1	No EMS	No	26	3	0	2	0	1
10	Rural	160	1	No EMS	No	26	3	0	2	1	1
11	Urban	80	2	No EMS	No	26	3	0	2	5	1
12	Rural	160	5	No EMS	No	26	3	0	2	7	0
13	Urban	320	2	No EMS	No	26	3	0	2	3	1
14	Rural	80	3	No EMS	No	26	3	0	2	6	0
15	Rural	320	1	No EMS	No	26	3	0	2	1	1
16	Rural	160	10	No EMS	No	26	3	0	2	9	0
17	Urban	640	1	No EMS	No	26	3	0	2	0	1
18	Urban	160	5	No EMS	No	26	3	0	2	9	0
19	Rural	160	2	No EMS	No	26	3	0	2	3	1
20	Urban	160	2	No EMS	No	26	3	0	2	3	1
21	Rural	80	1	EMS	No	26	3	0	2	1	1
22	Rural	160	1	EMS	No	26	3	0	2	1	1
23	Urban	80	1	EMS	No	26	3	0	2	2	1
24	Urban	160	1	EMS	No	26	3	0	2	1	1
25	Urban	80	1	No EMS	Yes	26	3	0	2	2	1
26	Urban	160	1	No EMS	Yes	26	3	0	2	2	1
27	Rural	80	1	No EMS	Yes	26	3	0	2	3	1
28	Rural	160	1	No EMS	Yes	26	3	0	2	3	1
1	Rural	0	0	0	0	27	2	1	1	3	1
2	Rural	80	1	No EMS	No	27	2	1	1	3	1
3	Urban	0	0	0	0	27	2	1	1	10	1
4	Urban	80	1	No EMS	No	27	2	1	1	9	1
5	Urban	160	1	No EMS	No	27	2	1	1	2	1
6	Urban	160	10	No EMS	No	27	2	1	1	2	1
7	Rural	80	2	No EMS	No	27	2	1	1	3	1
8	Rural	640	1	No EMS	No	27	2	1	1	3	1
9	Urban	320	1	No EMS	No	27	2	1	1	2	1
10	Rural	160	1	No EMS	No	27	2	1	1	2	1
11	Urban	80	2	No EMS	No	27	2	1	1	3	1
12	Rural	160	5	No EMS	No	27	2	1	1	2	1
13	Urban	320	2	No EMS	No	27	2	1	1	3	1
14	Rural	80	3	No EMS	No	27	2	1	1	3	1
15	Rural	320	1	No EMS	No	27	2	1	1	2	1
16	Rural	160	10	No EMS	No	27	2	1	1	3	1
17	Urban	640	1	No EMS	No	27	2	1	1	3	1
18	Urban	160	5	No EMS	No	27	2	1	1	2	1
19	Rural	160	2	No EMS	No	27	2	1	1	3	1
20	Urban	160	2	No EMS	No	27	2	1	1	2	1
21	Rural	80	1	EMS	No	27	2	1	1	3	1
22	Rural	160	1	EMS	No	27	2	1	1	3	1
23	Urban	80	1	EMS	No	27	2	1	1	2	1
24	Urban	160	1	EMS	No	27	2	1	1	3	1
25	Urban	80	1	No EMS	Yes	27	2	1	1	2	1
26	Urban	160	1	No EMS	Yes	27	2	1	1	2	1
27	Rural	80	1	No EMS	Yes	27	2	1	1	3	1
28	Rural	160	1	No EMS	Yes	27	2	1	1	2	1
1	Rural	0	0	0	0	28	4	1	2	9	1
2	Rural	80	1	No EMS	No	28	4	1	2	1	1
3	Urban	0	0	0	0	28	4	1	2	3	1
4	Urban	80	1	No EMS	No	28	4	1	2	3	1
5	Urban	160	1	No EMS	No	28	4	1	2	3	1
6	Urban	160	10	No EMS	No	28	4	1	2	6	0
7	Rural	80	2	No EMS	No	28	4	1	2	4	1
8	Rural	640	1	No EMS	No	28	4	1	2	1	1
9	Urban	320	1	No EMS	No	28	4	1	2	2	1
10	Rural	160	1	No EMS	No	28	4	1	2	3	1
11	Urban	80	2	No EMS	No	28	4	1	2	4	1
12	Rural	160	5	No EMS	No	28	4	1	2	5	0
13	Urban	320	2	No EMS	No	28	4	1	2	4	1
14	Rural	80	3	No EMS	No	28	4	1	2	4	1
15	Rural	320	1	No EMS	No	28	4	1	2	3	1
16	Rural	160	10	No EMS	No	28	4	1	2	7	1
17	Urban	640	1	No EMS	No	28	4	1	2	4	1
18	Urban	160	5	No EMS	No	28	4	1	2	3	0
19	Rural	160	2	No EMS	No	28	4	1	2	3	1
20	Urban	160	2	No EMS	No	28	4	1	2	3	1
21	Rural	80	1	EMS	No	28	4	1	2	2	1
22	Rural	160	1	EMS	No	28	4	1	2	2	1
23	Urban	80	1	EMS	No	28	4	1	2	3	1
24	Urban	160	1	EMS	No	28	4	1	2	2	1
25	Urban	80	1	No EMS	Yes	28	4	1	2	5	0
26	Urban	160	1	No EMS	Yes	28	4	1	2	5	0
27	Rural	80	1	No EMS	Yes	28	4	1	2	7	0
28	Rural	160	1	No EMS	Yes	28	4	1	2	5	0
1	Rural	0	0	0	0	29	2	1	2	0	1
2	Rural	80	1	No EMS	No	29	2	1	2	0	1
3	Urban	0	0	0	0	29	2	1	2	0	1
4	Urban	80	1	No EMS	No	29	2	1	2	1	1
5	Urban	160	1	No EMS	No	29	2	1	2	10	1
6	Urban	160	10	No EMS	No	29	2	1	2	8	0
7	Rural	80	2	No EMS	No	29	2	1	2	1	1
8	Rural	640	1	No EMS	No	29	2	1	2	0	1
9	Urban	320	1	No EMS	No	29	2	1	2	0	1
10	Rural	160	1	No EMS	No	29	2	1	2	0	1
11	Urban	80	2	No EMS	No	29	2	1	2	2	1
12	Rural	160	5	No EMS	No	29	2	1	2	3	1
13	Urban	320	2	No EMS	No	29	2	1	2	1	1
14	Rural	80	3	No EMS	No	29	2	1	2	2	1
15	Rural	320	1	No EMS	No	29	2	1	2	0	1
16	Rural	160	10	No EMS	No	29	2	1	2	5	0
17	Urban	640	1	No EMS	No	29	2	1	2	0	1
18	Urban	160	5	No EMS	No	29	2	1	2	3	1
19	Rural	160	2	No EMS	No	29	2	1	2	0	1
20	Urban	160	2	No EMS	No	29	2	1	2	0	1
21	Rural	80	1	EMS	No	29	2	1	2	0	1
22	Rural	160	1	EMS	No	29	2	1	2	0	1
23	Urban	80	1	EMS	No	29	2	1	2	0	1
24	Urban	160	1	EMS	No	29	2	1	2	0	1
25	Urban	80	1	No EMS	Yes	29	2	1	2	2	1
26	Urban	160	1	No EMS	Yes	29	2	1	2	2	1
27	Rural	80	1	No EMS	Yes	29	2	1	2	3	1
28	Rural	160	1	No EMS	Yes	29	2	1	2	2	1
1	Rural	0	0	0	0	30	2	1	2	2	1
2	Rural	80	1	No EMS	No	30	2	1	2	3	1
3	Urban	0	0	0	0	30	2	1	2	5	1
4	Urban	80	1	No EMS	No	30	2	1	2	5	1
5	Urban	160	1	No EMS	No	30	2	1	2	5	1
6	Urban	160	10	No EMS	No	30	2	1	2	7	0
7	Rural	80	2	No EMS	No	30	2	1	2	4	1
8	Rural	640	1	No EMS	No	30	2	1	2	3	1
9	Urban	320	1	No EMS	No	30	2	1	2	5	1
10	Rural	160	1	No EMS	No	30	2	1	2	3	1
11	Urban	80	2	No EMS	No	30	2	1	2	7	0
12	Rural	160	5	No EMS	No	30	2	1	2	5	1
13	Urban	320	2	No EMS	No	30	2	1	2	6	0
14	Rural	80	3	No EMS	No	30	2	1	2	5	0
15	Rural	320	1	No EMS	No	30	2	1	2	3	1
16	Rural	160	10	No EMS	No	30	2	1	2	5	0
17	Urban	640	1	No EMS	No	30	2	1	2	5	1
18	Urban	160	5	No EMS	No	30	2	1	2	6	0
19	Rural	160	2	No EMS	No	30	2	1	2	4	1
20	Urban	160	2	No EMS	No	30	2	1	2	6	1
21	Rural	80	1	EMS	No	30	2	1	2	4	1
22	Rural	160	1	EMS	No	30	2	1	2	10	1
23	Urban	80	1	EMS	No	30	2	1	2	5	1
24	Urban	160	1	EMS	No	30	2	1	2	6	1
25	Urban	80	1	No EMS	Yes	30	2	1	2	6	1
26	Urban	160	1	No EMS	Yes	30	2	1	2	5	1
27	Rural	80	1	No EMS	Yes	30	2	1	2	4	1
28	Rural	160	1	No EMS	Yes	30	2	1	2	3	1
1	Rural	0	0	0	0	31	2	1	2	3	1
2	Rural	80	1	No EMS	No	31	2	1	2	4	1
3	Urban	0	0	0	0	31	2	1	2	10	1
4	Urban	80	1	No EMS	No	31	2	1	2	2	1
5	Urban	160	1	No EMS	No	31	2	1	2	4	1
6	Urban	160	10	No EMS	No	31	2	1	2	9	0
7	Rural	80	2	No EMS	No	31	2	1	2	2	1
8	Rural	640	1	No EMS	No	31	2	1	2	6	0
9	Urban	320	1	No EMS	No	31	2	1	2	10	0
10	Rural	160	1	No EMS	No	31	2	1	2	1	1
11	Urban	80	2	No EMS	No	31	2	1	2	6	0
12	Rural	160	5	No EMS	No	31	2	1	2	8	0
13	Urban	320	2	No EMS	No	31	2	1	2	6	1
14	Rural	80	3	No EMS	No	31	2	1	2	10	1
15	Rural	320	1	No EMS	No	31	2	1	2	1	1
16	Rural	160	10	No EMS	No	31	2	1	2	10	0
17	Urban	640	1	No EMS	No	31	2	1	2	2	1
18	Urban	160	5	No EMS	No	31	2	1	2	9	0
19	Rural	160	2	No EMS	No	31	2	1	2	3	1
20	Urban	160	2	No EMS	No	31	2	1	2	2	1
21	Rural	80	1	EMS	No	31	2	1	2	1	1
22	Rural	160	1	EMS	No	31	2	1	2	1	1
23	Urban	80	1	EMS	No	31	2	1	2	2	1
24	Urban	160	1	EMS	No	31	2	1	2	0	1
25	Urban	80	1	No EMS	Yes	31	2	1	2	7	0
26	Urban	160	1	No EMS	Yes	31	2	1	2	1	0
27	Rural	80	1	No EMS	Yes	31	2	1	2	2	0
28	Rural	160	1	No EMS	Yes	31	2	1	2	1	1
1	Rural	0	0	0	0	32	3	0	2	0	1
2	Rural	80	1	No EMS	No	32	3	0	2	5	1
3	Urban	0	0	0	0	32	3	0	2	0	1
4	Urban	80	1	No EMS	No	32	3	0	2	5	0
5	Urban	160	1	No EMS	No	32	3	0	2	4	1
6	Urban	160	10	No EMS	No	32	3	0	2	8	0
7	Rural	80	2	No EMS	No	32	3	0	2	7	0
8	Rural	640	1	No EMS	No	32	3	0	2	2	1
9	Urban	320	1	No EMS	No	32	3	0	2	3	1
10	Rural	160	1	No EMS	No	32	3	0	2	2	1
11	Urban	80	2	No EMS	No	32	3	0	2	7	0
12	Rural	160	5	No EMS	No	32	3	0	2	8	0
13	Urban	320	2	No EMS	No	32	3	0	2	6	0
14	Rural	80	3	No EMS	No	32	3	0	2	8	0
15	Rural	320	1	No EMS	No	32	3	0	2	3	1
16	Rural	160	10	No EMS	No	32	3	0	2	8	0
17	Urban	640	1	No EMS	No	32	3	0	2	1	1
18	Urban	160	5	No EMS	No	32	3	0	2	6	0
19	Rural	160	2	No EMS	No	32	3	0	2	6	0
20	Urban	160	2	No EMS	No	32	3	0	2	6	0
21	Rural	80	1	EMS	No	32	3	0	2	3	1
22	Rural	160	1	EMS	No	32	3	0	2	3	1
23	Urban	80	1	EMS	No	32	3	0	2	3	1
24	Urban	160	1	EMS	No	32	3	0	2	3	1
25	Urban	80	1	No EMS	Yes	32	3	0	2	4	1
26	Urban	160	1	No EMS	Yes	32	3	0	2	4	1
27	Rural	80	1	No EMS	Yes	32	3	0	2	4	1
28	Rural	160	1	No EMS	Yes	32	3	0	2	4	1
1	Rural	0	0	0	0	33	2	1	2	1	1
2	Rural	80	1	No EMS	No	33	2	1	2	4	1
3	Urban	0	0	0	0	33	2	1	2	2	1
4	Urban	80	1	No EMS	No	33	2	1	2	5	1
5	Urban	160	1	No EMS	No	33	2	1	2	3	1
6	Urban	160	10	No EMS	No	33	2	1	2	8	0
7	Rural	80	2	No EMS	No	33	2	1	2	5	1
8	Rural	640	1	No EMS	No	33	2	1	2	1	1
9	Urban	320	1	No EMS	No	33	2	1	2	2	1
10	Rural	160	1	No EMS	No	33	2	1	2	2	1
11	Urban	80	2	No EMS	No	33	2	1	2	6	1
12	Rural	160	5	No EMS	No	33	2	1	2	6	0
13	Urban	320	2	No EMS	No	33	2	1	2	3	1
14	Rural	80	3	No EMS	No	33	2	1	2	6	0
15	Rural	320	1	No EMS	No	33	2	1	2	2	1
16	Rural	160	10	No EMS	No	33	2	1	2	8	0
17	Urban	640	1	No EMS	No	33	2	1	2	2	1
18	Urban	160	5	No EMS	No	33	2	1	2	6	1
19	Rural	160	2	No EMS	No	33	2	1	2	5	1
20	Urban	160	2	No EMS	No	33	2	1	2	4	1
21	Rural	80	1	EMS	No	33	2	1	2	4	1
22	Rural	160	1	EMS	No	33	2	1	2	3	1
23	Urban	80	1	EMS	No	33	2	1	2	5	1
24	Urban	160	1	EMS	No	33	2	1	2	4	1
25	Urban	80	1	No EMS	Yes	33	2	1	2	5	1
26	Urban	160	1	No EMS	Yes	33	2	1	2	3	1
27	Rural	80	1	No EMS	Yes	33	2	1	2	3	1
28	Rural	160	1	No EMS	Yes	33	2	1	2	3	1
1	Rural	0	0	0	0	34	2	1	2	1	1
2	Rural	80	1	No EMS	No	34	2	1	2	1	1
3	Urban	0	0	0	0	34	2	1	2	3	1
4	Urban	80	1	No EMS	No	34	2	1	2	3	1
5	Urban	160	1	No EMS	No	34	2	1	2	3	1
6	Urban	160	10	No EMS	No	34	2	1	2	6	0
7	Rural	80	2	No EMS	No	34	2	1	2	10	1
8	Rural	640	1	No EMS	No	34	2	1	2	1	1
9	Urban	320	1	No EMS	No	34	2	1	2	3	1
10	Rural	160	1	No EMS	No	34	2	1	2	1	1
11	Urban	80	2	No EMS	No	34	2	1	2	4	1
12	Rural	160	5	No EMS	No	34	2	1	2	4	1
13	Urban	320	2	No EMS	No	34	2	1	2	7	1
14	Rural	80	3	No EMS	No	34	2	1	2	5	1
15	Rural	320	1	No EMS	No	34	2	1	2	3	1
16	Rural	160	10	No EMS	No	34	2	1	2	4	1
17	Urban	640	1	No EMS	No	34	2	1	2	3	1
18	Urban	160	5	No EMS	No	34	2	1	2	6	0
19	Rural	160	2	No EMS	No	34	2	1	2	2	1
20	Urban	160	2	No EMS	No	34	2	1	2	4	1
21	Rural	80	1	EMS	No	34	2	1	2	3	1
22	Rural	160	1	EMS	No	34	2	1	2	3	1
23	Urban	80	1	EMS	No	34	2	1	2	10	1
24	Urban	160	1	EMS	No	34	2	1	2	2	1
25	Urban	80	1	No EMS	Yes	34	2	1	2	3	1
26	Urban	160	1	No EMS	Yes	34	2	1	2	4	1
27	Rural	80	1	No EMS	Yes	34	2	1	2	3	1
28	Rural	160	1	No EMS	Yes	34	2	1	2	4	1
1	Rural	0	0	0	0	35	2	1	1	0	1
2	Rural	80	1	No EMS	No	35	2	1	1	4	1
3	Urban	0	0	0	0	35	2	1	1	3	1
4	Urban	80	1	No EMS	No	35	2	1	1	3	1
5	Urban	160	1	No EMS	No	35	2	1	1	3	1
6	Urban	160	10	No EMS	No	35	2	1	1	7	0
7	Rural	80	2	No EMS	No	35	2	1	1	5	1
8	Rural	640	1	No EMS	No	35	2	1	1	0	1
9	Urban	320	1	No EMS	No	35	2	1	1	3	1
10	Rural	160	1	No EMS	No	35	2	1	1	0	1
11	Urban	80	2	No EMS	No	35	2	1	1	3	1
12	Rural	160	5	No EMS	No	35	2	1	1	4	1
13	Urban	320	2	No EMS	No	35	2	1	1	2	1
14	Rural	80	3	No EMS	No	35	2	1	1	4	1
15	Rural	320	1	No EMS	No	35	2	1	1	1	1
16	Rural	160	10	No EMS	No	35	2	1	1	8	0
17	Urban	640	1	No EMS	No	35	2	1	1	3	1
18	Urban	160	5	No EMS	No	35	2	1	1	6	0
19	Rural	160	2	No EMS	No	35	2	1	1	2	1
20	Urban	160	2	No EMS	No	35	2	1	1	3	1
21	Rural	80	1	EMS	No	35	2	1	1	2	1
22	Rural	160	1	EMS	No	35	2	1	1	2	1
23	Urban	80	1	EMS	No	35	2	1	1	3	1
24	Urban	160	1	EMS	No	35	2	1	1	3	1
25	Urban	80	1	No EMS	Yes	35	2	1	1	4	1
26	Urban	160	1	No EMS	Yes	35	2	1	1	3	1
27	Rural	80	1	No EMS	Yes	35	2	1	1	3	1
28	Rural	160	1	No EMS	Yes	35	2	1	1	3	1
1	Rural	0	0	0	0	36	2	1	2	0	1
2	Rural	80	1	No EMS	No	36	2	1	2	0	1
3	Urban	0	0	0	0	36	2	1	2	0	1
4	Urban	80	1	No EMS	No	36	2	1	2	2	1
5	Urban	160	1	No EMS	No	36	2	1	2	1	1
6	Urban	160	10	No EMS	No	36	2	1	2	4	0
7	Rural	80	2	No EMS	No	36	2	1	2	10	1
8	Rural	640	1	No EMS	No	36	2	1	2	1	1
9	Urban	320	1	No EMS	No	36	2	1	2	1	1
10	Rural	160	1	No EMS	No	36	2	1	2	1	1
11	Urban	80	2	No EMS	No	36	2	1	2	3	1
12	Rural	160	5	No EMS	No	36	2	1	2	4	0
13	Urban	320	2	No EMS	No	36	2	1	2	1	1
14	Rural	80	3	No EMS	No	36	2	1	2	2	1
15	Rural	320	1	No EMS	No	36	2	1	2	1	1
16	Rural	160	10	No EMS	No	36	2	1	2	4	1
17	Urban	640	1	No EMS	No	36	2	1	2	1	1
18	Urban	160	5	No EMS	No	36	2	1	2	2	0
19	Rural	160	2	No EMS	No	36	2	1	2	1	1
20	Urban	160	2	No EMS	No	36	2	1	2	3	0
21	Rural	80	1	EMS	No	36	2	1	2	2	1
22	Rural	160	1	EMS	No	36	2	1	2	1	1
23	Urban	80	1	EMS	No	36	2	1	2	2	1
24	Urban	160	1	EMS	No	36	2	1	2	2	1
25	Urban	80	1	No EMS	Yes	36	2	1	2	1	1
26	Urban	160	1	No EMS	Yes	36	2	1	2	2	1
27	Rural	80	1	No EMS	Yes	36	2	1	2	2	1
28	Rural	160	1	No EMS	Yes	36	2	1	2	1	1
1	Rural	0	0	0	0	37	2	1	2	2	1
2	Rural	80	1	No EMS	No	37	2	1	2	10	1
3	Urban	0	0	0	0	37	2	1	2	1	1
4	Urban	80	1	No EMS	No	37	2	1	2	2	1
5	Urban	160	1	No EMS	No	37	2	1	2	1	1
6	Urban	160	10	No EMS	No	37	2	1	2	7	0
7	Rural	80	2	No EMS	No	37	2	1	2	4	1
8	Rural	640	1	No EMS	No	37	2	1	2	2	1
9	Urban	320	1	No EMS	No	37	2	1	2	10	1
10	Rural	160	1	No EMS	No	37	2	1	2	2	1
11	Urban	80	2	No EMS	No	37	2	1	2	7	0
12	Rural	160	5	No EMS	No	37	2	1	2	7	0
13	Urban	320	2	No EMS	No	37	2	1	2	6	1
14	Rural	80	3	No EMS	No	37	2	1	2	8	0
15	Rural	320	1	No EMS	No	37	2	1	2	2	0
16	Rural	160	10	No EMS	No	37	2	1	2	9	0
17	Urban	640	1	No EMS	No	37	2	1	2	1	1
18	Urban	160	5	No EMS	No	37	2	1	2	8	0
19	Rural	160	2	No EMS	No	37	2	1	2	4	1
20	Urban	160	2	No EMS	No	37	2	1	2	2	1
21	Rural	80	1	EMS	No	37	2	1	2	3	1
22	Rural	160	1	EMS	No	37	2	1	2	2	1
23	Urban	80	1	EMS	No	37	2	1	2	4	1
24	Urban	160	1	EMS	No	37	2	1	2	1	1
25	Urban	80	1	No EMS	Yes	37	2	1	2	10	1
26	Urban	160	1	No EMS	Yes	37	2	1	2	10	1
27	Rural	80	1	No EMS	Yes	37	2	1	2	4	1
28	Rural	160	1	No EMS	Yes	37	2	1	2	2	1
1	Rural	0	0	0	0	38	2	1	3	0	1
2	Rural	80	1	No EMS	No	38	2	1	3	3	1
3	Urban	0	0	0	0	38	2	1	3	0	1
4	Urban	80	1	No EMS	No	38	2	1	3	3	1
5	Urban	160	1	No EMS	No	38	2	1	3	1	1
6	Urban	160	10	No EMS	No	38	2	1	3	10	0
7	Rural	80	2	No EMS	No	38	2	1	3	4	1
8	Rural	640	1	No EMS	No	38	2	1	3	0	1
9	Urban	320	1	No EMS	No	38	2	1	3	0	1
10	Rural	160	1	No EMS	No	38	2	1	3	1	1
11	Urban	80	2	No EMS	No	38	2	1	3	5	0
12	Rural	160	5	No EMS	No	38	2	1	3	3	0
13	Urban	320	2	No EMS	No	38	2	1	3	1	1
14	Rural	80	3	No EMS	No	38	2	1	3	3	0
15	Rural	320	1	No EMS	No	38	2	1	3	1	1
16	Rural	160	10	No EMS	No	38	2	1	3	6	0
17	Urban	640	1	No EMS	No	38	2	1	3	0	1
18	Urban	160	5	No EMS	No	38	2	1	3	6	0
19	Rural	160	2	No EMS	No	38	2	1	3	4	1
20	Urban	160	2	No EMS	No	38	2	1	3	2	1
21	Rural	80	1	EMS	No	38	2	1	3	1	1
22	Rural	160	1	EMS	No	38	2	1	3	2	1
23	Urban	80	1	EMS	No	38	2	1	3	2	1
24	Urban	160	1	EMS	No	38	2	1	3	1	1
25	Urban	80	1	No EMS	Yes	38	2	1	3	5	0
26	Urban	160	1	No EMS	Yes	38	2	1	3	6	0
27	Rural	80	1	No EMS	Yes	38	2	1	3	2	1
28	Rural	160	1	No EMS	Yes	38	2	1	3	3	1
1	Rural	0	0	0	0	39	2	0	1	0	1
2	Rural	80	1	No EMS	No	39	2	0	1	4	1
3	Urban	0	0	0	0	39	2	0	1	0	1
4	Urban	80	1	No EMS	No	39	2	0	1	10	1
5	Urban	160	1	No EMS	No	39	2	0	1	2	1
6	Urban	160	10	No EMS	No	39	2	0	1	10	0
7	Rural	80	2	No EMS	No	39	2	0	1	10	0
8	Rural	640	1	No EMS	No	39	2	0	1	3	1
9	Urban	320	1	No EMS	No	39	2	0	1	2	1
10	Rural	160	1	No EMS	No	39	2	0	1	2	1
11	Urban	80	2	No EMS	No	39	2	0	1	10	0
12	Rural	160	5	No EMS	No	39	2	0	1	5	0
13	Urban	320	2	No EMS	No	39	2	0	1	2	1
14	Rural	80	3	No EMS	No	39	2	0	1	5	0
15	Rural	320	1	No EMS	No	39	2	0	1	2	1
16	Rural	160	10	No EMS	No	39	2	0	1	8	0
17	Urban	640	1	No EMS	No	39	2	0	1	10	1
18	Urban	160	5	No EMS	No	39	2	0	1	6	0
19	Rural	160	2	No EMS	No	39	2	0	1	3	1
20	Urban	160	2	No EMS	No	39	2	0	1	3	1
21	Rural	80	1	EMS	No	39	2	0	1	5	1
22	Rural	160	1	EMS	No	39	2	0	1	4	1
23	Urban	80	1	EMS	No	39	2	0	1	4	1
24	Urban	160	1	EMS	No	39	2	0	1	3	1
25	Urban	80	1	No EMS	Yes	39	2	0	1	4	1
26	Urban	160	1	No EMS	Yes	39	2	0	1	4	1
27	Rural	80	1	No EMS	Yes	39	2	0	1	4	1
28	Rural	160	1	No EMS	Yes	39	2	0	1	10	1
1	Rural	0	0	0	0	40	2	1	2	5	1
2	Rural	80	1	No EMS	No	40	2	1	2	5	1
3	Urban	0	0	0	0	40	2	1	2	7	1
4	Urban	80	1	No EMS	No	40	2	1	2	7	1
5	Urban	160	1	No EMS	No	40	2	1	2	7	1
6	Urban	160	10	No EMS	No	40	2	1	2	8	1
7	Rural	80	2	No EMS	No	40	2	1	2	5	1
8	Rural	640	1	No EMS	No	40	2	1	2	5	1
9	Urban	320	1	No EMS	No	40	2	1	2	7	1
10	Rural	160	1	No EMS	No	40	2	1	2	5	1
11	Urban	80	2	No EMS	No	40	2	1	2	7	1
12	Rural	160	5	No EMS	No	40	2	1	2	5	1
13	Urban	320	2	No EMS	No	40	2	1	2	7	1
14	Rural	80	3	No EMS	No	40	2	1	2	5	1
15	Rural	320	1	No EMS	No	40	2	1	2	5	1
16	Rural	160	10	No EMS	No	40	2	1	2	5	1
17	Urban	640	1	No EMS	No	40	2	1	2	7	1
18	Urban	160	5	No EMS	No	40	2	1	2	7	1
19	Rural	160	2	No EMS	No	40	2	1	2	5	1
20	Urban	160	2	No EMS	No	40	2	1	2	7	1
21	Rural	80	1	EMS	No	40	2	1	2	5	1
22	Rural	160	1	EMS	No	40	2	1	2	5	1
23	Urban	80	1	EMS	No	40	2	1	2	7	1
24	Urban	160	1	EMS	No	40	2	1	2	7	1
25	Urban	80	1	No EMS	Yes	40	2	1	2	7	1
26	Urban	160	1	No EMS	Yes	40	2	1	2	7	1
27	Rural	80	1	No EMS	Yes	40	2	1	2	7	1
28	Rural	160	1	No EMS	Yes	40	2	1	2	5	1
1	Rural	0	0	0	0	41	2	1	2	0	1
2	Rural	80	1	No EMS	No	41	2	1	2	6	1
3	Urban	0	0	0	0	41	2	1	2	0	1
4	Urban	80	1	No EMS	No	41	2	1	2	4	1
5	Urban	160	1	No EMS	No	41	2	1	2	2	1
6	Urban	160	10	No EMS	No	41	2	1	2	10	0
7	Rural	80	2	No EMS	No	41	2	1	2	8	1
8	Rural	640	1	No EMS	No	41	2	1	2	0	1
9	Urban	320	1	No EMS	No	41	2	1	2	0	1
10	Rural	160	1	No EMS	No	41	2	1	2	1	1
11	Urban	80	2	No EMS	No	41	2	1	2	7	1
12	Rural	160	5	No EMS	No	41	2	1	2	7	0
13	Urban	320	2	No EMS	No	41	2	1	2	2	1
14	Rural	80	3	No EMS	No	41	2	1	2	9	0
15	Rural	320	1	No EMS	No	41	2	1	2	0	1
16	Rural	160	10	No EMS	No	41	2	1	2	10	0
17	Urban	640	1	No EMS	No	41	2	1	2	0	1
18	Urban	160	5	No EMS	No	41	2	1	2	7	1
19	Rural	160	2	No EMS	No	41	2	1	2	2	1
20	Urban	160	2	No EMS	No	41	2	1	2	2	1
21	Rural	80	1	EMS	No	41	2	1	2	6	1
22	Rural	160	1	EMS	No	41	2	1	2	5	1
23	Urban	80	1	EMS	No	41	2	1	2	3	1
24	Urban	160	1	EMS	No	41	2	1	2	2	1
25	Urban	80	1	No EMS	Yes	41	2	1	2	2	1
26	Urban	160	1	No EMS	Yes	41	2	1	2	3	1
27	Rural	80	1	No EMS	Yes	41	2	1	2	6	1
28	Rural	160	1	No EMS	Yes	41	2	1	2	4	1
1	Rural	0	0	0	0	42	5	1	1	3	1
2	Rural	80	1	No EMS	No	42	5	1	1	4	1
3	Urban	0	0	0	0	42	5	1	1	2	1
4	Urban	80	1	No EMS	No	42	5	1	1	2	1
5	Urban	160	1	No EMS	No	42	5	1	1	3	1
6	Urban	160	10	No EMS	No	42	5	1	1	7	0
7	Rural	80	2	No EMS	No	42	5	1	1	1	1
8	Rural	640	1	No EMS	No	42	5	1	1	1	1
9	Urban	320	1	No EMS	No	42	5	1	1	2	1
10	Rural	160	1	No EMS	No	42	5	1	1	2	1
11	Urban	80	2	No EMS	No	42	5	1	1	8	0
12	Rural	160	5	No EMS	No	42	5	1	1	10	0
13	Urban	320	2	No EMS	No	42	5	1	1	2	1
14	Rural	80	3	No EMS	No	42	5	1	1	5	1
15	Rural	320	1	No EMS	No	42	5	1	1	0	1
16	Rural	160	10	No EMS	No	42	5	1	1	10	0
17	Urban	640	1	No EMS	No	42	5	1	1	2	1
18	Urban	160	5	No EMS	No	42	5	1	1	7	1
19	Rural	160	2	No EMS	No	42	5	1	1	5	1
20	Urban	160	2	No EMS	No	42	5	1	1	4	1
21	Rural	80	1	EMS	No	42	5	1	1	1	1
22	Rural	160	1	EMS	No	42	5	1	1	4	1
23	Urban	80	1	EMS	No	42	5	1	1	2	1
24	Urban	160	1	EMS	No	42	5	1	1	2	1
25	Urban	80	1	No EMS	Yes	42	5	1	1	2	1
26	Urban	160	1	No EMS	Yes	42	5	1	1	2	1
27	Rural	80	1	No EMS	Yes	42	5	1	1	2	1
28	Rural	160	1	No EMS	Yes	42	5	1	1	4	1
1	Rural	0	0	0	0	43	4	0	1	0	1
2	Rural	80	1	No EMS	No	43	4	0	1	4	1
3	Urban	0	0	0	0	43	4	0	1	0	1
4	Urban	80	1	No EMS	No	43	4	0	1	5	1
5	Urban	160	1	No EMS	No	43	4	0	1	10	1
6	Urban	160	10	No EMS	No	43	4	0	1	10	0
7	Rural	80	2	No EMS	No	43	4	0	1	6	1
8	Rural	640	1	No EMS	No	43	4	0	1	2	1
9	Urban	320	1	No EMS	No	43	4	0	1	4	1
10	Rural	160	1	No EMS	No	43	4	0	1	4	1
11	Urban	80	2	No EMS	No	43	4	0	1	7	1
12	Rural	160	5	No EMS	No	43	4	0	1	10	0
13	Urban	320	2	No EMS	No	43	4	0	1	6	1
14	Rural	80	3	No EMS	No	43	4	0	1	8	0
15	Rural	320	1	No EMS	No	43	4	0	1	4	1
16	Rural	160	10	No EMS	No	43	4	0	1	10	0
17	Urban	640	1	No EMS	No	43	4	0	1	2	1
18	Urban	160	5	No EMS	No	43	4	0	1	10	0
19	Rural	160	2	No EMS	No	43	4	0	1	5	1
20	Urban	160	2	No EMS	No	43	4	0	1	5	1
21	Rural	80	1	EMS	No	43	4	0	1	5	1
22	Rural	160	1	EMS	No	43	4	0	1	4	1
23	Urban	80	1	EMS	No	43	4	0	1	5	1
24	Urban	160	1	EMS	No	43	4	0	1	2	1
25	Urban	80	1	No EMS	Yes	43	4	0	1	6	1
26	Urban	160	1	No EMS	Yes	43	4	0	1	4	1
27	Rural	80	1	No EMS	Yes	43	4	0	1	5	1
28	Rural	160	1	No EMS	Yes	43	4	0	1	3	1
1	Rural	0	0	0	0	44	2	1	4	2	1
2	Rural	80	1	No EMS	No	44	2	1	4	10	1
3	Urban	0	0	0	0	44	2	1	4	4	1
4	Urban	80	1	No EMS	No	44	2	1	4	5	1
5	Urban	160	1	No EMS	No	44	2	1	4	4	1
6	Urban	160	10	No EMS	No	44	2	1	4	8	0
7	Rural	80	2	No EMS	No	44	2	1	4	5	1
8	Rural	640	1	No EMS	No	44	2	1	4	2	1
9	Urban	320	1	No EMS	No	44	2	1	4	4	1
10	Rural	160	1	No EMS	No	44	2	1	4	2	1
11	Urban	80	2	No EMS	No	44	2	1	4	6	0
12	Rural	160	5	No EMS	No	44	2	1	4	5	0
13	Urban	320	2	No EMS	No	44	2	1	4	4	1
14	Rural	80	3	No EMS	No	44	2	1	4	5	0
15	Rural	320	1	No EMS	No	44	2	1	4	1	1
16	Rural	160	10	No EMS	No	44	2	1	4	6	0
17	Urban	640	1	No EMS	No	44	2	1	4	4	1
18	Urban	160	5	No EMS	No	44	2	1	4	7	0
19	Rural	160	2	No EMS	No	44	2	1	4	3	1
20	Urban	160	2	No EMS	No	44	2	1	4	4	1
21	Rural	80	1	EMS	No	44	2	1	4	4	0
22	Rural	160	1	EMS	No	44	2	1	4	3	1
23	Urban	80	1	EMS	No	44	2	1	4	6	0
24	Urban	160	1	EMS	No	44	2	1	4	4	1
25	Urban	80	1	No EMS	Yes	44	2	1	4	6	0
26	Urban	160	1	No EMS	Yes	44	2	1	4	6	0
27	Rural	80	1	No EMS	Yes	44	2	1	4	5	0
28	Rural	160	1	No EMS	Yes	44	2	1	4	4	1
1	Rural	0	0	0	0	45	4	2	3	0	1
2	Rural	80	1	No EMS	No	45	4	2	3	5	1
3	Urban	0	0	0	0	45	4	2	3	0	1
4	Urban	80	1	No EMS	No	45	4	2	3	5	1
5	Urban	160	1	No EMS	No	45	4	2	3	5	1
6	Urban	160	10	No EMS	No	45	4	2	3	10	0
7	Rural	80	2	No EMS	No	45	4	2	3	5	1
8	Rural	640	1	No EMS	No	45	4	2	3	1	1
9	Urban	320	1	No EMS	No	45	4	2	3	1	1
10	Rural	160	1	No EMS	No	45	4	2	3	5	1
11	Urban	80	2	No EMS	No	45	4	2	3	10	0
12	Rural	160	5	No EMS	No	45	4	2	3	10	0
13	Urban	320	2	No EMS	No	45	4	2	3	6	1
14	Rural	80	3	No EMS	No	45	4	2	3	5	0
15	Rural	320	1	No EMS	No	45	4	2	3	5	1
16	Rural	160	10	No EMS	No	45	4	2	3	10	0
17	Urban	640	1	No EMS	No	45	4	2	3	1	1
18	Urban	160	5	No EMS	No	45	4	2	3	10	0
19	Rural	160	2	No EMS	No	45	4	2	3	7	1
20	Urban	160	2	No EMS	No	45	4	2	3	7	1
21	Rural	80	1	EMS	No	45	4	2	3	5	1
22	Rural	160	1	EMS	No	45	4	2	3	5	1
23	Urban	80	1	EMS	No	45	4	2	3	5	1
24	Urban	160	1	EMS	No	45	4	2	3	5	1
25	Urban	80	1	No EMS	Yes	45	4	2	3	5	1
26	Urban	160	1	No EMS	Yes	45	4	2	3	5	1
27	Rural	80	1	No EMS	Yes	45	4	2	3	6	1
28	Rural	160	1	No EMS	Yes	45	4	2	3	6	1
1	Rural	0	0	0	0	46	4	1	2	0	1
2	Rural	80	1	No EMS	No	46	4	1	2	1	1
3	Urban	0	0	0	0	46	4	1	2	0	1
4	Urban	80	1	No EMS	No	46	4	1	2	1	1
5	Urban	160	1	No EMS	No	46	4	1	2	1	1
6	Urban	160	10	No EMS	No	46	4	1	2	8	0
7	Rural	80	2	No EMS	No	46	4	1	2	2	1
8	Rural	640	1	No EMS	No	46	4	1	2	1	1
9	Urban	320	1	No EMS	No	46	4	1	2	1	1
10	Rural	160	1	No EMS	No	46	4	1	2	1	1
11	Urban	80	2	No EMS	No	46	4	1	2	4	1
12	Rural	160	5	No EMS	No	46	4	1	2	7	0
13	Urban	320	2	No EMS	No	46	4	1	2	2	1
14	Rural	80	3	No EMS	No	46	4	1	2	3	1
15	Rural	320	1	No EMS	No	46	4	1	2	1	1
16	Rural	160	10	No EMS	No	46	4	1	2	8	0
17	Urban	640	1	No EMS	No	46	4	1	2	1	1
18	Urban	160	5	No EMS	No	46	4	1	2	6	0
19	Rural	160	2	No EMS	No	46	4	1	2	2	1
20	Urban	160	2	No EMS	No	46	4	1	2	10	1
21	Rural	80	1	EMS	No	46	4	1	2	1	1
22	Rural	160	1	EMS	No	46	4	1	2	1	1
23	Urban	80	1	EMS	No	46	4	1	2	1	1
24	Urban	160	1	EMS	No	46	4	1	2	1	1
25	Urban	80	1	No EMS	Yes	46	4	1	2	1	1
26	Urban	160	1	No EMS	Yes	46	4	1	2	1	1
27	Rural	80	1	No EMS	Yes	46	4	1	2	1	1
28	Rural	160	1	No EMS	Yes	46	4	1	2	1	1
1	Rural	0	0	0	0	47	4	1	3	0	1
2	Rural	80	1	No EMS	No	47	4	1	3	5	1
3	Urban	0	0	0	0	47	4	1	3	2	1
4	Urban	80	1	No EMS	No	47	4	1	3	5	1
5	Urban	160	1	No EMS	No	47	4	1	3	4	1
6	Urban	160	10	No EMS	No	47	4	1	3	10	0
7	Rural	80	2	No EMS	No	47	4	1	3	8	0
8	Rural	640	1	No EMS	No	47	4	1	3	3	1
9	Urban	320	1	No EMS	No	47	4	1	3	4	1
10	Rural	160	1	No EMS	No	47	4	1	3	5	1
11	Urban	80	2	No EMS	No	47	4	1	3	9	0
12	Rural	160	5	No EMS	No	47	4	1	3	10	0
13	Urban	320	2	No EMS	No	47	4	1	3	6	0
14	Rural	80	3	No EMS	No	47	4	1	3	8	0
15	Rural	320	1	No EMS	No	47	4	1	3	3	1
16	Rural	160	10	No EMS	No	47	4	1	3	10	0
17	Urban	640	1	No EMS	No	47	4	1	3	1	1
18	Urban	160	5	No EMS	No	47	4	1	3	9	0
19	Rural	160	2	No EMS	No	47	4	1	3	7	1
20	Urban	160	2	No EMS	No	47	4	1	3	4	1
21	Rural	80	1	EMS	No	47	4	1	3	2	1
22	Rural	160	1	EMS	No	47	4	1	3	2	1
23	Urban	80	1	EMS	No	47	4	1	3	5	1
24	Urban	160	1	EMS	No	47	4	1	3	2	1
25	Urban	80	1	No EMS	Yes	47	4	1	3	5	1
26	Urban	160	1	No EMS	Yes	47	4	1	3	2	1
27	Rural	80	1	No EMS	Yes	47	4	1	3	5	1
28	Rural	160	1	No EMS	Yes	47	4	1	3	1	1
1	Rural	0	0	0	0	48	2	0	2	0	1
2	Rural	80	1	No EMS	No	48	2	0	2	3	1
3	Urban	0	0	0	0	48	2	0	2	0	1
4	Urban	80	1	No EMS	No	48	2	0	2	5	1
5	Urban	160	1	No EMS	No	48	2	0	2	3	1
6	Urban	160	10	No EMS	No	48	2	0	2	8	0
7	Rural	80	2	No EMS	No	48	2	0	2	5	0
8	Rural	640	1	No EMS	No	48	2	0	2	1	1
9	Urban	320	1	No EMS	No	48	2	0	2	1	1
10	Rural	160	1	No EMS	No	48	2	0	2	1	1
11	Urban	80	2	No EMS	No	48	2	0	2	4	0
12	Rural	160	5	No EMS	No	48	2	0	2	4	0
13	Urban	320	2	No EMS	No	48	2	0	2	5	1
14	Rural	80	3	No EMS	No	48	2	0	2	8	0
15	Rural	320	1	No EMS	No	48	2	0	2	1	1
16	Rural	160	10	No EMS	No	48	2	0	2	7	0
17	Urban	640	1	No EMS	No	48	2	0	2	0	1
18	Urban	160	5	No EMS	No	48	2	0	2	8	0
19	Rural	160	2	No EMS	No	48	2	0	2	4	0
20	Urban	160	2	No EMS	No	48	2	0	2	5	0
21	Rural	80	1	EMS	No	48	2	0	2	6	0
22	Rural	160	1	EMS	No	48	2	0	2	4	1
23	Urban	80	1	EMS	No	48	2	0	2	5	0
24	Urban	160	1	EMS	No	48	2	0	2	3	1
25	Urban	80	1	No EMS	Yes	48	2	0	2	6	0
26	Urban	160	1	No EMS	Yes	48	2	0	2	4	1
27	Rural	80	1	No EMS	Yes	48	2	0	2	3	1
28	Rural	160	1	No EMS	Yes	48	2	0	2	3	1
1	Rural	0	0	0	0	49	2	1	3	0	1
2	Rural	80	1	No EMS	No	49	2	1	3	2	1
3	Urban	0	0	0	0	49	2	1	3	0	1
4	Urban	80	1	No EMS	No	49	2	1	3	1	1
5	Urban	160	1	No EMS	No	49	2	1	3	0	1
6	Urban	160	10	No EMS	No	49	2	1	3	4	1
7	Rural	80	2	No EMS	No	49	2	1	3	3	1
8	Rural	640	1	No EMS	No	49	2	1	3	0	1
9	Urban	320	1	No EMS	No	49	2	1	3	0	1
10	Rural	160	1	No EMS	No	49	2	1	3	1	1
11	Urban	80	2	No EMS	No	49	2	1	3	4	1
12	Rural	160	5	No EMS	No	49	2	1	3	3	0
13	Urban	320	2	No EMS	No	49	2	1	3	2	1
14	Rural	80	3	No EMS	No	49	2	1	3	6	0
15	Rural	320	1	No EMS	No	49	2	1	3	0	1
16	Rural	160	10	No EMS	No	49	2	1	3	6	0
17	Urban	640	1	No EMS	No	49	2	1	3	0	1
18	Urban	160	5	No EMS	No	49	2	1	3	4	1
19	Rural	160	2	No EMS	No	49	2	1	3	1	1
20	Urban	160	2	No EMS	No	49	2	1	3	2	1
21	Rural	80	1	EMS	No	49	2	1	3	2	1
22	Rural	160	1	EMS	No	49	2	1	3	10	1
23	Urban	80	1	EMS	No	49	2	1	3	2	1
24	Urban	160	1	EMS	No	49	2	1	3	0	1
25	Urban	80	1	No EMS	Yes	49	2	1	3	5	0
26	Urban	160	1	No EMS	Yes	49	2	1	3	4	0
27	Rural	80	1	No EMS	Yes	49	2	1	3	3	0
28	Rural	160	1	No EMS	Yes	49	2	1	3	3	1
1	Rural	0	0	0	0	50	4	1	2	0	1
2	Rural	80	1	No EMS	No	50	4	1	2	0	1
3	Urban	0	0	0	0	50	4	1	2	0	1
4	Urban	80	1	No EMS	No	50	4	1	2	0	1
5	Urban	160	1	No EMS	No	50	4	1	2	0	1
6	Urban	160	10	No EMS	No	50	4	1	2	10	0
7	Rural	80	2	No EMS	No	50	4	1	2	1	1
8	Rural	640	1	No EMS	No	50	4	1	2	0	1
9	Urban	320	1	No EMS	No	50	4	1	2	0	1
10	Rural	160	1	No EMS	No	50	4	1	2	0	1
11	Urban	80	2	No EMS	No	50	4	1	2	3	1
12	Rural	160	5	No EMS	No	50	4	1	2	10	0
13	Urban	320	2	No EMS	No	50	4	1	2	0	1
14	Rural	80	3	No EMS	No	50	4	1	2	10	1
15	Rural	320	1	No EMS	No	50	4	1	2	0	1
16	Rural	160	10	No EMS	No	50	4	1	2	10	0
17	Urban	640	1	No EMS	No	50	4	1	2	0	1
18	Urban	160	5	No EMS	No	50	4	1	2	10	0
19	Rural	160	2	No EMS	No	50	4	1	2	0	1
20	Urban	160	2	No EMS	No	50	4	1	2	3	1
21	Rural	80	1	EMS	No	50	4	1	2	5	1
22	Rural	160	1	EMS	No	50	4	1	2	0	1
23	Urban	80	1	EMS	No	50	4	1	2	1	1
24	Urban	160	1	EMS	No	50	4	1	2	0	1
25	Urban	80	1	No EMS	Yes	50	4	1	2	1	1
26	Urban	160	1	No EMS	Yes	50	4	1	2	0	1
27	Rural	80	1	No EMS	Yes	50	4	1	2	1	1
28	Rural	160	1	No EMS	Yes	50	4	1	2	1	1
1	Rural	0	0	0	0	51	2	1	3	0	1
2	Rural	80	1	No EMS	No	51	2	1	3	3	1
3	Urban	0	0	0	0	51	2	1	3	0	1
4	Urban	80	1	No EMS	No	51	2	1	3	4	1
5	Urban	160	1	No EMS	No	51	2	1	3	2	1
6	Urban	160	10	No EMS	No	51	2	1	3	10	0
7	Rural	80	2	No EMS	No	51	2	1	3	6	1
8	Rural	640	1	No EMS	No	51	2	1	3	1	1
9	Urban	320	1	No EMS	No	51	2	1	3	2	1
10	Rural	160	1	No EMS	No	51	2	1	3	1	1
11	Urban	80	2	No EMS	No	51	2	1	3	3	1
12	Rural	160	5	No EMS	No	51	2	1	3	7	1
13	Urban	320	2	No EMS	No	51	2	1	3	4	0
14	Rural	80	3	No EMS	No	51	2	1	3	8	0
15	Rural	320	1	No EMS	No	51	2	1	3	1	1
16	Rural	160	10	No EMS	No	51	2	1	3	4	1
17	Urban	640	1	No EMS	No	51	2	1	3	2	1
18	Urban	160	5	No EMS	No	51	2	1	3	5	0
19	Rural	160	2	No EMS	No	51	2	1	3	4	1
20	Urban	160	2	No EMS	No	51	2	1	3	2	1
21	Rural	80	1	EMS	No	51	2	1	3	1	1
22	Rural	160	1	EMS	No	51	2	1	3	2	1
23	Urban	80	1	EMS	No	51	2	1	3	4	1
24	Urban	160	1	EMS	No	51	2	1	3	3	1
25	Urban	80	1	No EMS	Yes	51	2	1	3	2	0
26	Urban	160	1	No EMS	Yes	51	2	1	3	2	1
27	Rural	80	1	No EMS	Yes	51	2	1	3	4	1
28	Rural	160	1	No EMS	Yes	51	2	1	3	3	1
1	Rural	0	0	0	0	52	2	1	1	0	1
2	Rural	80	1	No EMS	No	52	2	1	1	10	1
3	Urban	0	0	0	0	52	2	1	1	0	1
4	Urban	80	1	No EMS	No	52	2	1	1	2	1
5	Urban	160	1	No EMS	No	52	2	1	1	2	1
6	Urban	160	10	No EMS	No	52	2	1	1	7	0
7	Rural	80	2	No EMS	No	52	2	1	1	4	1
8	Rural	640	1	No EMS	No	52	2	1	1	1	1
9	Urban	320	1	No EMS	No	52	2	1	1	1	1
10	Rural	160	1	No EMS	No	52	2	1	1	1	1
11	Urban	80	2	No EMS	No	52	2	1	1	5	1
12	Rural	160	5	No EMS	No	52	2	1	1	6	1
13	Urban	320	2	No EMS	No	52	2	1	1	2	1
14	Rural	80	3	No EMS	No	52	2	1	1	6	1
15	Rural	320	1	No EMS	No	52	2	1	1	1	1
16	Rural	160	10	No EMS	No	52	2	1	1	7	0
17	Urban	640	1	No EMS	No	52	2	1	1	1	1
18	Urban	160	5	No EMS	No	52	2	1	1	5	1
19	Rural	160	2	No EMS	No	52	2	1	1	2	1
20	Urban	160	2	No EMS	No	52	2	1	1	10	1
21	Rural	80	1	EMS	No	52	2	1	1	2	1
22	Rural	160	1	EMS	No	52	2	1	1	2	1
23	Urban	80	1	EMS	No	52	2	1	1	2	1
24	Urban	160	1	EMS	No	52	2	1	1	2	1
25	Urban	80	1	No EMS	Yes	52	2	1	1	2	1
26	Urban	160	1	No EMS	Yes	52	2	1	1	2	1
27	Rural	80	1	No EMS	Yes	52	2	1	1	2	1
28	Rural	160	1	No EMS	Yes	52	2	1	1	2	1
1	Rural	0	0	0	0	53	4	0	1	0	1
2	Rural	80	1	No EMS	No	53	4	0	1	0	1
3	Urban	0	0	0	0	53	4	0	1	0	1
4	Urban	80	1	No EMS	No	53	4	0	1	0	1
5	Urban	160	1	No EMS	No	53	4	0	1	0	1
6	Urban	160	10	No EMS	No	53	4	0	1	0	1
7	Rural	80	2	No EMS	No	53	4	0	1	0	1
8	Rural	640	1	No EMS	No	53	4	0	1	0	1
9	Urban	320	1	No EMS	No	53	4	0	1	0	1
10	Rural	160	1	No EMS	No	53	4	0	1	0	1
11	Urban	80	2	No EMS	No	53	4	0	1	0	1
12	Rural	160	5	No EMS	No	53	4	0	1	0	1
13	Urban	320	2	No EMS	No	53	4	0	1	0	1
14	Rural	80	3	No EMS	No	53	4	0	1	0	1
15	Rural	320	1	No EMS	No	53	4	0	1	0	1
16	Rural	160	10	No EMS	No	53	4	0	1	0	1
17	Urban	640	1	No EMS	No	53	4	0	1	0	1
18	Urban	160	5	No EMS	No	53	4	0	1	0	1
19	Rural	160	2	No EMS	No	53	4	0	1	0	1
20	Urban	160	2	No EMS	No	53	4	0	1	0	1
21	Rural	80	1	EMS	No	53	4	0	1	0	1
22	Rural	160	1	EMS	No	53	4	0	1	0	1
23	Urban	80	1	EMS	No	53	4	0	1	0	1
24	Urban	160	1	EMS	No	53	4	0	1	0	1
25	Urban	80	1	No EMS	Yes	53	4	0	1	0	1
26	Urban	160	1	No EMS	Yes	53	4	0	1	0	1
27	Rural	80	1	No EMS	Yes	53	4	0	1	0	1
28	Rural	160	1	No EMS	Yes	53	4	0	1	0	1
1	Rural	0	0	0	0	54	3	1	4	0	1
2	Rural	80	1	No EMS	No	54	3	1	4	1	1
3	Urban	0	0	0	0	54	3	1	4	3	1
4	Urban	80	1	No EMS	No	54	3	1	4	3	1
5	Urban	160	1	No EMS	No	54	3	1	4	3	1
6	Urban	160	10	No EMS	No	54	3	1	4	9	1
7	Rural	80	2	No EMS	No	54	3	1	4	1	1
8	Rural	640	1	No EMS	No	54	3	1	4	0	1
9	Urban	320	1	No EMS	No	54	3	1	4	3	1
10	Rural	160	1	No EMS	No	54	3	1	4	1	1
11	Urban	80	2	No EMS	No	54	3	1	4	3	1
12	Rural	160	5	No EMS	No	54	3	1	4	4	1
13	Urban	320	2	No EMS	No	54	3	1	4	3	1
14	Rural	80	3	No EMS	No	54	3	1	4	4	1
15	Rural	320	1	No EMS	No	54	3	1	4	1	1
16	Rural	160	10	No EMS	No	54	3	1	4	5	1
17	Urban	640	1	No EMS	No	54	3	1	4	3	1
18	Urban	160	5	No EMS	No	54	3	1	4	4	1
19	Rural	160	2	No EMS	No	54	3	1	4	1	1
20	Urban	160	2	No EMS	No	54	3	1	4	3	1
21	Rural	80	1	EMS	No	54	3	1	4	1	1
22	Rural	160	1	EMS	No	54	3	1	4	1	1
23	Urban	80	1	EMS	No	54	3	1	4	3	1
24	Urban	160	1	EMS	No	54	3	1	4	3	1
25	Urban	80	1	No EMS	Yes	54	3	1	4	8	0
26	Urban	160	1	No EMS	Yes	54	3	1	4	8	0
27	Rural	80	1	No EMS	Yes	54	3	1	4	9	0
28	Rural	160	1	No EMS	Yes	54	3	1	4	9	0
1	Rural	0	0	0	0	55	2	1	2	1	1
2	Rural	80	1	No EMS	No	55	2	1	2	2	1
3	Urban	0	0	0	0	55	2	1	2	2	1
4	Urban	80	1	No EMS	No	55	2	1	2	3	1
5	Urban	160	1	No EMS	No	55	2	1	2	2	1
6	Urban	160	10	No EMS	No	55	2	1	2	7	0
7	Rural	80	2	No EMS	No	55	2	1	2	2	1
8	Rural	640	1	No EMS	No	55	2	1	2	1	1
9	Urban	320	1	No EMS	No	55	2	1	2	2	1
10	Rural	160	1	No EMS	No	55	2	1	2	1	1
11	Urban	80	2	No EMS	No	55	2	1	2	3	1
12	Rural	160	5	No EMS	No	55	2	1	2	5	1
13	Urban	320	2	No EMS	No	55	2	1	2	2	1
14	Rural	80	3	No EMS	No	55	2	1	2	4	0
15	Rural	320	1	No EMS	No	55	2	1	2	1	1
16	Rural	160	10	No EMS	No	55	2	1	2	6	0
17	Urban	640	1	No EMS	No	55	2	1	2	2	1
18	Urban	160	5	No EMS	No	55	2	1	2	5	0
19	Rural	160	2	No EMS	No	55	2	1	2	2	1
20	Urban	160	2	No EMS	No	55	2	1	2	3	1
21	Rural	80	1	EMS	No	55	2	1	2	2	1
22	Rural	160	1	EMS	No	55	2	1	2	2	1
23	Urban	80	1	EMS	No	55	2	1	2	2	1
24	Urban	160	1	EMS	No	55	2	1	2	1	1
25	Urban	80	1	No EMS	Yes	55	2	1	2	2	1
26	Urban	160	1	No EMS	Yes	55	2	1	2	2	1
27	Rural	80	1	No EMS	Yes	55	2	1	2	2	1
28	Rural	160	1	No EMS	Yes	55	2	1	2	1	1
1	Rural	0	0	0	0	56	3	1	3	0	1
2	Rural	80	1	No EMS	No	56	3	1	3	3	0
3	Urban	0	0	0	0	56	3	1	3	1	1
4	Urban	80	1	No EMS	No	56	3	1	3	4	1
5	Urban	160	1	No EMS	No	56	3	1	3	2	1
6	Urban	160	10	No EMS	No	56	3	1	3	9	0
7	Rural	80	2	No EMS	No	56	3	1	3	4	0
8	Rural	640	1	No EMS	No	56	3	1	3	1	1
9	Urban	320	1	No EMS	No	56	3	1	3	2	1
10	Rural	160	1	No EMS	No	56	3	1	3	2	1
11	Urban	80	2	No EMS	No	56	3	1	3	4	0
12	Rural	160	5	No EMS	No	56	3	1	3	8	0
13	Urban	320	2	No EMS	No	56	3	1	3	3	1
14	Rural	80	3	No EMS	No	56	3	1	3	5	0
15	Rural	320	1	No EMS	No	56	3	1	3	2	1
16	Rural	160	10	No EMS	No	56	3	1	3	9	0
17	Urban	640	1	No EMS	No	56	3	1	3	1	1
18	Urban	160	5	No EMS	No	56	3	1	3	5	0
19	Rural	160	2	No EMS	No	56	3	1	3	2	0
20	Urban	160	2	No EMS	No	56	3	1	3	2	1
21	Rural	80	1	EMS	No	56	3	1	3	2	1
22	Rural	160	1	EMS	No	56	3	1	3	2	1
23	Urban	80	1	EMS	No	56	3	1	3	2	1
24	Urban	160	1	EMS	No	56	3	1	3	1	1
25	Urban	80	1	No EMS	Yes	56	3	1	3	2	1
26	Urban	160	1	No EMS	Yes	56	3	1	3	1	1
27	Rural	80	1	No EMS	Yes	56	3	1	3	2	1
28	Rural	160	1	No EMS	Yes	56	3	1	3	2	1
1	Rural	0	0	0	0	57	2	1	2	0	1
2	Rural	80	1	No EMS	No	57	2	1	2	2	1
3	Urban	0	0	0	0	57	2	1	2	0	1
4	Urban	80	1	No EMS	No	57	2	1	2	2	1
5	Urban	160	1	No EMS	No	57	2	1	2	1	1
6	Urban	160	10	No EMS	No	57	2	1	2	7	1
7	Rural	80	2	No EMS	No	57	2	1	2	7	1
8	Rural	640	1	No EMS	No	57	2	1	2	0	1
9	Urban	320	1	No EMS	No	57	2	1	2	1	1
10	Rural	160	1	No EMS	No	57	2	1	2	2	1
11	Urban	80	2	No EMS	No	57	2	1	2	4	1
12	Rural	160	5	No EMS	No	57	2	1	2	8	0
13	Urban	320	2	No EMS	No	57	2	1	2	1	1
14	Rural	80	3	No EMS	No	57	2	1	2	8	1
15	Rural	320	1	No EMS	No	57	2	1	2	1	1
16	Rural	160	10	No EMS	No	57	2	1	2	8	0
17	Urban	640	1	No EMS	No	57	2	1	2	0	1
18	Urban	160	5	No EMS	No	57	2	1	2	6	1
19	Rural	160	2	No EMS	No	57	2	1	2	3	1
20	Urban	160	2	No EMS	No	57	2	1	2	3	1
21	Rural	80	1	EMS	No	57	2	1	2	4	1
22	Rural	160	1	EMS	No	57	2	1	2	1	1
23	Urban	80	1	EMS	No	57	2	1	2	2	1
24	Urban	160	1	EMS	No	57	2	1	2	1	1
25	Urban	80	1	No EMS	Yes	57	2	1	2	2	1
26	Urban	160	1	No EMS	Yes	57	2	1	2	1	1
27	Rural	80	1	No EMS	Yes	57	2	1	2	3	1
28	Rural	160	1	No EMS	Yes	57	2	1	2	2	1
1	Rural	0	0	0	0	58	2	1	2	0	1
2	Rural	80	1	No EMS	No	58	2	1	2	2	1
3	Urban	0	0	0	0	58	2	1	2	0	1
4	Urban	80	1	No EMS	No	58	2	1	2	2	1
5	Urban	160	1	No EMS	No	58	2	1	2	1	1
6	Urban	160	10	No EMS	No	58	2	1	2	8	0
7	Rural	80	2	No EMS	No	58	2	1	2	3	1
8	Rural	640	1	No EMS	No	58	2	1	2	1	1
9	Urban	320	1	No EMS	No	58	2	1	2	1	1
10	Rural	160	1	No EMS	No	58	2	1	2	1	1
11	Urban	80	2	No EMS	No	58	2	1	2	3	1
12	Rural	160	5	No EMS	No	58	2	1	2	6	0
13	Urban	320	2	No EMS	No	58	2	1	2	2	1
14	Rural	80	3	No EMS	No	58	2	1	2	4	1
15	Rural	320	1	No EMS	No	58	2	1	2	1	1
16	Rural	160	10	No EMS	No	58	2	1	2	9	0
17	Urban	640	1	No EMS	No	58	2	1	2	1	1
18	Urban	160	5	No EMS	No	58	2	1	2	5	1
19	Rural	160	2	No EMS	No	58	2	1	2	2	1
20	Urban	160	2	No EMS	No	58	2	1	2	2	1
21	Rural	80	1	EMS	No	58	2	1	2	1	1
22	Rural	160	1	EMS	No	58	2	1	2	1	1
23	Urban	80	1	EMS	No	58	2	1	2	1	1
24	Urban	160	1	EMS	No	58	2	1	2	1	1
25	Urban	80	1	No EMS	Yes	58	2	1	2	1	1
26	Urban	160	1	No EMS	Yes	58	2	1	2	1	1
27	Rural	80	1	No EMS	Yes	58	2	1	2	1	1
28	Rural	160	1	No EMS	Yes	58	2	1	2	1	1
1	Rural	0	0	0	0	59	2	1	2	0	1
2	Rural	80	1	No EMS	No	59	2	1	2	7	0
3	Urban	0	0	0	0	59	2	1	2	0	1
4	Urban	80	1	No EMS	No	59	2	1	2	3	1
5	Urban	160	1	No EMS	No	59	2	1	2	1	1
6	Urban	160	10	No EMS	No	59	2	1	2	8	0
7	Rural	80	2	No EMS	No	59	2	1	2	9	0
8	Rural	640	1	No EMS	No	59	2	1	2	5	1
9	Urban	320	1	No EMS	No	59	2	1	2	1	1
10	Rural	160	1	No EMS	No	59	2	1	2	6	1
11	Urban	80	2	No EMS	No	59	2	1	2	3	1
12	Rural	160	5	No EMS	No	59	2	1	2	10	0
13	Urban	320	2	No EMS	No	59	2	1	2	2	1
14	Rural	80	3	No EMS	No	59	2	1	2	10	0
15	Rural	320	1	No EMS	No	59	2	1	2	5	1
16	Rural	160	10	No EMS	No	59	2	1	2	10	0
17	Urban	640	1	No EMS	No	59	2	1	2	0	1
18	Urban	160	5	No EMS	No	59	2	1	2	7	0
19	Rural	160	2	No EMS	No	59	2	1	2	7	0
20	Urban	160	2	No EMS	No	59	2	1	2	3	1
21	Rural	80	1	EMS	No	59	2	1	2	7	1
22	Rural	160	1	EMS	No	59	2	1	2	6	1
23	Urban	80	1	EMS	No	59	2	1	2	2	1
24	Urban	160	1	EMS	No	59	2	1	2	1	1
25	Urban	80	1	No EMS	Yes	59	2	1	2	6	1
26	Urban	160	1	No EMS	Yes	59	2	1	2	6	1
27	Rural	80	1	No EMS	Yes	59	2	1	2	7	1
28	Rural	160	1	No EMS	Yes	59	2	1	2	6	1
1	Rural	0	0	0	0	60	2	1	3	1	1
2	Rural	80	1	No EMS	No	60	2	1	3	2	1
3	Urban	0	0	0	0	60	2	1	3	1	1
4	Urban	80	1	No EMS	No	60	2	1	3	1	1
5	Urban	160	1	No EMS	No	60	2	1	3	1	1
6	Urban	160	10	No EMS	No	60	2	1	3	3	1
7	Rural	80	2	No EMS	No	60	2	1	3	2	1
8	Rural	640	1	No EMS	No	60	2	1	3	1	1
9	Urban	320	1	No EMS	No	60	2	1	3	1	1
10	Rural	160	1	No EMS	No	60	2	1	3	1	1
11	Urban	80	2	No EMS	No	60	2	1	3	1	1
12	Rural	160	5	No EMS	No	60	2	1	3	3	1
13	Urban	320	2	No EMS	No	60	2	1	3	2	1
14	Rural	80	3	No EMS	No	60	2	1	3	2	1
15	Rural	320	1	No EMS	No	60	2	1	3	1	1
16	Rural	160	10	No EMS	No	60	2	1	3	4	1
17	Urban	640	1	No EMS	No	60	2	1	3	0	1
18	Urban	160	5	No EMS	No	60	2	1	3	1	1
19	Rural	160	2	No EMS	No	60	2	1	3	2	1
20	Urban	160	2	No EMS	No	60	2	1	3	2	1
21	Rural	80	1	EMS	No	60	2	1	3	2	1
22	Rural	160	1	EMS	No	60	2	1	3	1	1
23	Urban	80	1	EMS	No	60	2	1	3	2	1
24	Urban	160	1	EMS	No	60	2	1	3	1	1
25	Urban	80	1	No EMS	Yes	60	2	1	3	3	1
26	Urban	160	1	No EMS	Yes	60	2	1	3	2	1
27	Rural	80	1	No EMS	Yes	60	2	1	3	2	1
28	Rural	160	1	No EMS	Yes	60	2	1	3	1	1
1	Rural	0	0	0	0	61	3	1	3	0	1
2	Rural	80	1	No EMS	No	61	3	1	3	1	1
3	Urban	0	0	0	0	61	3	1	3	0	1
4	Urban	80	1	No EMS	No	61	3	1	3	2	1
5	Urban	160	1	No EMS	No	61	3	1	3	1	1
6	Urban	160	10	No EMS	No	61	3	1	3	9	0
7	Rural	80	2	No EMS	No	61	3	1	3	4	1
8	Rural	640	1	No EMS	No	61	3	1	3	0	1
9	Urban	320	1	No EMS	No	61	3	1	3	0	1
10	Rural	160	1	No EMS	No	61	3	1	3	1	1
11	Urban	80	2	No EMS	No	61	3	1	3	4	0
12	Rural	160	5	No EMS	No	61	3	1	3	8	0
13	Urban	320	2	No EMS	No	61	3	1	3	1	1
14	Rural	80	3	No EMS	No	61	3	1	3	7	0
15	Rural	320	1	No EMS	No	61	3	1	3	1	1
16	Rural	160	10	No EMS	No	61	3	1	3	9	0
17	Urban	640	1	No EMS	No	61	3	1	3	0	1
18	Urban	160	5	No EMS	No	61	3	1	3	7	0
19	Rural	160	2	No EMS	No	61	3	1	3	2	1
20	Urban	160	2	No EMS	No	61	3	1	3	3	1
21	Rural	80	1	EMS	No	61	3	1	3	2	1
22	Rural	160	1	EMS	No	61	3	1	3	1	1
23	Urban	80	1	EMS	No	61	3	1	3	2	1
24	Urban	160	1	EMS	No	61	3	1	3	1	1
25	Urban	80	1	No EMS	Yes	61	3	1	3	3	1
26	Urban	160	1	No EMS	Yes	61	3	1	3	2	1
27	Rural	80	1	No EMS	Yes	61	3	1	3	3	1
28	Rural	160	1	No EMS	Yes	61	3	1	3	2	1
1	Rural	0	0	0	0	62	2	1	2	6	1
2	Rural	80	1	No EMS	No	62	2	1	2	7	1
3	Urban	0	0	0	0	62	2	1	2	8	1
4	Urban	80	1	No EMS	No	62	2	1	2	7	1
5	Urban	160	1	No EMS	No	62	2	1	2	7	1
6	Urban	160	10	No EMS	No	62	2	1	2	8	1
7	Rural	80	2	No EMS	No	62	2	1	2	8	1
8	Rural	640	1	No EMS	No	62	2	1	2	5	1
9	Urban	320	1	No EMS	No	62	2	1	2	7	1
10	Rural	160	1	No EMS	No	62	2	1	2	6	1
11	Urban	80	2	No EMS	No	62	2	1	2	8	1
12	Rural	160	5	No EMS	No	62	2	1	2	7	1
13	Urban	320	2	No EMS	No	62	2	1	2	7	1
14	Rural	80	3	No EMS	No	62	2	1	2	7	1
15	Rural	320	1	No EMS	No	62	2	1	2	6	1
16	Rural	160	10	No EMS	No	62	2	1	2	6	1
17	Urban	640	1	No EMS	No	62	2	1	2	8	1
18	Urban	160	5	No EMS	No	62	2	1	2	7	1
19	Rural	160	2	No EMS	No	62	2	1	2	6	1
20	Urban	160	2	No EMS	No	62	2	1	2	8	1
21	Rural	80	1	EMS	No	62	2	1	2	6	1
22	Rural	160	1	EMS	No	62	2	1	2	7	1
23	Urban	80	1	EMS	No	62	2	1	2	7	1
24	Urban	160	1	EMS	No	62	2	1	2	7	1
25	Urban	80	1	No EMS	Yes	62	2	1	2	8	1
26	Urban	160	1	No EMS	Yes	62	2	1	2	7	1
27	Rural	80	1	No EMS	Yes	62	2	1	2	8	1
28	Rural	160	1	No EMS	Yes	62	2	1	2	6	1
1	Rural	0	0	0	0	63	2	2	2	0	1
2	Rural	80	1	No EMS	No	63	2	2	2	2	1
3	Urban	0	0	0	0	63	2	2	2	3	1
4	Urban	80	1	No EMS	No	63	2	2	2	4	1
5	Urban	160	1	No EMS	No	63	2	2	2	4	1
6	Urban	160	10	No EMS	No	63	2	2	2	7	0
7	Rural	80	2	No EMS	No	63	2	2	2	5	0
8	Rural	640	1	No EMS	No	63	2	2	2	1	1
9	Urban	320	1	No EMS	No	63	2	2	2	3	1
10	Rural	160	1	No EMS	No	63	2	2	2	2	1
11	Urban	80	2	No EMS	No	63	2	2	2	4	1
12	Rural	160	5	No EMS	No	63	2	2	2	6	0
13	Urban	320	2	No EMS	No	63	2	2	2	4	1
14	Rural	80	3	No EMS	No	63	2	2	2	5	0
15	Rural	320	1	No EMS	No	63	2	2	2	1	1
16	Rural	160	10	No EMS	No	63	2	2	2	7	0
17	Urban	640	1	No EMS	No	63	2	2	2	3	1
18	Urban	160	5	No EMS	No	63	2	2	2	6	0
19	Rural	160	2	No EMS	No	63	2	2	2	3	1
20	Urban	160	2	No EMS	No	63	2	2	2	4	1
21	Rural	80	1	EMS	No	63	2	2	2	2	1
22	Rural	160	1	EMS	No	63	2	2	2	2	1
23	Urban	80	1	EMS	No	63	2	2	2	3	1
24	Urban	160	1	EMS	No	63	2	2	2	3	1
25	Urban	80	1	No EMS	Yes	63	2	2	2	4	1
26	Urban	160	1	No EMS	Yes	63	2	2	2	4	1
27	Rural	80	1	No EMS	Yes	63	2	2	2	3	1
28	Rural	160	1	No EMS	Yes	63	2	2	2	4	1
1	Rural	0	0	0	0	64	2	1	3	0	1
2	Rural	80	1	No EMS	No	64	2	1	3	1	1
3	Urban	0	0	0	0	64	2	1	3	0	1
4	Urban	80	1	No EMS	No	64	2	1	3	4	1
5	Urban	160	1	No EMS	No	64	2	1	3	2	1
6	Urban	160	10	No EMS	No	64	2	1	3	6	1
7	Rural	80	2	No EMS	No	64	2	1	3	4	1
8	Rural	640	1	No EMS	No	64	2	1	3	1	1
9	Urban	320	1	No EMS	No	64	2	1	3	0	1
10	Rural	160	1	No EMS	No	64	2	1	3	0	1
11	Urban	80	2	No EMS	No	64	2	1	3	2	1
12	Rural	160	5	No EMS	No	64	2	1	3	5	1
13	Urban	320	2	No EMS	No	64	2	1	3	0	1
14	Rural	80	3	No EMS	No	64	2	1	3	0	1
15	Rural	320	1	No EMS	No	64	2	1	3	0	1
16	Rural	160	10	No EMS	No	64	2	1	3	7	0
17	Urban	640	1	No EMS	No	64	2	1	3	0	1
18	Urban	160	5	No EMS	No	64	2	1	3	4	1
19	Rural	160	2	No EMS	No	64	2	1	3	0	1
20	Urban	160	2	No EMS	No	64	2	1	3	1	1
21	Rural	80	1	EMS	No	64	2	1	3	4	1
22	Rural	160	1	EMS	No	64	2	1	3	0	1
23	Urban	80	1	EMS	No	64	2	1	3	1	1
24	Urban	160	1	EMS	No	64	2	1	3	0	1
25	Urban	80	1	No EMS	Yes	64	2	1	3	8	0
26	Urban	160	1	No EMS	Yes	64	2	1	3	8	0
27	Rural	80	1	No EMS	Yes	64	2	1	3	2	1
28	Rural	160	1	No EMS	Yes	64	2	1	3	2	1
1	Rural	0	0	0	0	65	4	1	3	1	1
2	Rural	80	1	No EMS	No	65	4	1	3	3	1
3	Urban	0	0	0	0	65	4	1	3	0	1
4	Urban	80	1	No EMS	No	65	4	1	3	2	1
5	Urban	160	1	No EMS	No	65	4	1	3	1	1
6	Urban	160	10	No EMS	No	65	4	1	3	5	0
7	Rural	80	2	No EMS	No	65	4	1	3	5	1
8	Rural	640	1	No EMS	No	65	4	1	3	2	1
9	Urban	320	1	No EMS	No	65	4	1	3	0	1
10	Rural	160	1	No EMS	No	65	4	1	3	1	1
11	Urban	80	2	No EMS	No	65	4	1	3	2	1
12	Rural	160	5	No EMS	No	65	4	1	3	8	0
13	Urban	320	2	No EMS	No	65	4	1	3	2	1
14	Rural	80	3	No EMS	No	65	4	1	3	5	1
15	Rural	320	1	No EMS	No	65	4	1	3	1	1
16	Rural	160	10	No EMS	No	65	4	1	3	9	0
17	Urban	640	1	No EMS	No	65	4	1	3	0	1
18	Urban	160	5	No EMS	No	65	4	1	3	4	1
19	Rural	160	2	No EMS	No	65	4	1	3	2	1
20	Urban	160	2	No EMS	No	65	4	1	3	1	1
21	Rural	80	1	EMS	No	65	4	1	3	1	1
22	Rural	160	1	EMS	No	65	4	1	3	1	1
23	Urban	80	1	EMS	No	65	4	1	3	0	1
24	Urban	160	1	EMS	No	65	4	1	3	0	1
25	Urban	80	1	No EMS	Yes	65	4	1	3	0	1
26	Urban	160	1	No EMS	Yes	65	4	1	3	0	1
27	Rural	80	1	No EMS	Yes	65	4	1	3	1	1
28	Rural	160	1	No EMS	Yes	65	4	1	3	1	1
1	Rural	0	0	0	0	66	2	1	4	0	1
2	Rural	80	1	No EMS	No	66	2	1	4	4	1
3	Urban	0	0	0	0	66	2	1	4	4	1
4	Urban	80	1	No EMS	No	66	2	1	4	5	1
5	Urban	160	1	No EMS	No	66	2	1	4	4	1
6	Urban	160	10	No EMS	No	66	2	1	4	7	0
7	Rural	80	2	No EMS	No	66	2	1	4	5	1
8	Rural	640	1	No EMS	No	66	2	1	4	0	1
9	Urban	320	1	No EMS	No	66	2	1	4	4	1
10	Rural	160	1	No EMS	No	66	2	1	4	2	1
11	Urban	80	2	No EMS	No	66	2	1	4	7	0
12	Rural	160	5	No EMS	No	66	2	1	4	7	0
13	Urban	320	2	No EMS	No	66	2	1	4	4	1
14	Rural	80	3	No EMS	No	66	2	1	4	4	1
15	Rural	320	1	No EMS	No	66	2	1	4	0	1
16	Rural	160	10	No EMS	No	66	2	1	4	7	0
17	Urban	640	1	No EMS	No	66	2	1	4	3	1
18	Urban	160	5	No EMS	No	66	2	1	4	8	0
19	Rural	160	2	No EMS	No	66	2	1	4	3	1
20	Urban	160	2	No EMS	No	66	2	1	4	4	1
21	Rural	80	1	EMS	No	66	2	1	4	2	1
22	Rural	160	1	EMS	No	66	2	1	4	2	1
23	Urban	80	1	EMS	No	66	2	1	4	4	1
24	Urban	160	1	EMS	No	66	2	1	4	3	1
25	Urban	80	1	No EMS	Yes	66	2	1	4	10	0
26	Urban	160	1	No EMS	Yes	66	2	1	4	10	0
27	Rural	80	1	No EMS	Yes	66	2	1	4	8	0
28	Rural	160	1	No EMS	Yes	66	2	1	4	8	0
1	Rural	0	0	0	0	67	2	1	4	1	1
2	Rural	80	1	No EMS	No	67	2	1	4	4	1
3	Urban	0	0	0	0	67	2	1	4	3	1
4	Urban	80	1	No EMS	No	67	2	1	4	4	1
5	Urban	160	1	No EMS	No	67	2	1	4	3	1
6	Urban	160	10	No EMS	No	67	2	1	4	6	0
7	Rural	80	2	No EMS	No	67	2	1	4	5	1
8	Rural	640	1	No EMS	No	67	2	1	4	3	1
9	Urban	320	1	No EMS	No	67	2	1	4	3	1
10	Rural	160	1	No EMS	No	67	2	1	4	3	1
11	Urban	80	2	No EMS	No	67	2	1	4	4	1
12	Rural	160	5	No EMS	No	67	2	1	4	6	0
13	Urban	320	2	No EMS	No	67	2	1	4	3	1
14	Rural	80	3	No EMS	No	67	2	1	4	7	0
15	Rural	320	1	No EMS	No	67	2	1	4	2	1
16	Rural	160	10	No EMS	No	67	2	1	4	6	0
17	Urban	640	1	No EMS	No	67	2	1	4	2	1
18	Urban	160	5	No EMS	No	67	2	1	4	10	1
19	Rural	160	2	No EMS	No	67	2	1	4	4	1
20	Urban	160	2	No EMS	No	67	2	1	4	4	1
21	Rural	80	1	EMS	No	67	2	1	4	6	0
22	Rural	160	1	EMS	No	67	2	1	4	5	1
23	Urban	80	1	EMS	No	67	2	1	4	5	1
24	Urban	160	1	EMS	No	67	2	1	4	4	1
25	Urban	80	1	No EMS	Yes	67	2	1	4	10	0
26	Urban	160	1	No EMS	Yes	67	2	1	4	8	0
27	Rural	80	1	No EMS	Yes	67	2	1	4	10	0
28	Rural	160	1	No EMS	Yes	67	2	1	4	9	0
1	Rural	0	0	0	0	68	2	0	1	1	1
2	Rural	80	1	No EMS	No	68	2	0	1	4	1
3	Urban	0	0	0	0	68	2	0	1	3	1
4	Urban	80	1	No EMS	No	68	2	0	1	4	1
5	Urban	160	1	No EMS	No	68	2	0	1	2	1
6	Urban	160	10	No EMS	No	68	2	0	1	7	0
7	Rural	80	2	No EMS	No	68	2	0	1	5	0
8	Rural	640	1	No EMS	No	68	2	0	1	1	1
9	Urban	320	1	No EMS	No	68	2	0	1	1	1
10	Rural	160	1	No EMS	No	68	2	0	1	2	1
11	Urban	80	2	No EMS	No	68	2	0	1	6	0
12	Rural	160	5	No EMS	No	68	2	0	1	7	0
13	Urban	320	2	No EMS	No	68	2	0	1	5	1
14	Rural	80	3	No EMS	No	68	2	0	1	8	0
15	Rural	320	1	No EMS	No	68	2	0	1	4	1
16	Rural	160	10	No EMS	No	68	2	0	1	8	0
17	Urban	640	1	No EMS	No	68	2	0	1	1	1
18	Urban	160	5	No EMS	No	68	2	0	1	8	0
19	Rural	160	2	No EMS	No	68	2	0	1	3	1
20	Urban	160	2	No EMS	No	68	2	0	1	6	1
21	Rural	80	1	EMS	No	68	2	0	1	4	0
22	Rural	160	1	EMS	No	68	2	0	1	3	1
23	Urban	80	1	EMS	No	68	2	0	1	4	0
24	Urban	160	1	EMS	No	68	2	0	1	2	1
25	Urban	80	1	No EMS	Yes	68	2	0	1	5	0
26	Urban	160	1	No EMS	Yes	68	2	0	1	4	0
27	Rural	80	1	No EMS	Yes	68	2	0	1	4	0
28	Rural	160	1	No EMS	Yes	68	2	0	1	4	0
1	Rural	0	0	0	0	69	2	1	2	3	1
2	Rural	80	1	No EMS	No	69	2	1	2	3	1
3	Urban	0	0	0	0	69	2	1	2	5	1
4	Urban	80	1	No EMS	No	69	2	1	2	5	1
5	Urban	160	1	No EMS	No	69	2	1	2	6	1
6	Urban	160	10	No EMS	No	69	2	1	2	7	0
7	Rural	80	2	No EMS	No	69	2	1	2	4	1
8	Rural	640	1	No EMS	No	69	2	1	2	3	1
9	Urban	320	1	No EMS	No	69	2	1	2	1	1
10	Rural	160	1	No EMS	No	69	2	1	2	1	1
11	Urban	80	2	No EMS	No	69	2	1	2	7	0
12	Rural	160	5	No EMS	No	69	2	1	2	7	0
13	Urban	320	2	No EMS	No	69	2	1	2	7	0
14	Rural	80	3	No EMS	No	69	2	1	2	6	0
15	Rural	320	1	No EMS	No	69	2	1	2	1	1
16	Rural	160	10	No EMS	No	69	2	1	2	7	0
17	Urban	640	1	No EMS	No	69	2	1	2	1	1
18	Urban	160	5	No EMS	No	69	2	1	2	7	0
19	Rural	160	2	No EMS	No	69	2	1	2	2	1
20	Urban	160	2	No EMS	No	69	2	1	2	4	1
21	Rural	80	1	EMS	No	69	2	1	2	3	1
22	Rural	160	1	EMS	No	69	2	1	2	3	1
23	Urban	80	1	EMS	No	69	2	1	2	2	1
24	Urban	160	1	EMS	No	69	2	1	2	3	1
25	Urban	80	1	No EMS	Yes	69	2	1	2	8	0
26	Urban	160	1	No EMS	Yes	69	2	1	2	7	0
27	Rural	80	1	No EMS	Yes	69	2	1	2	7	0
28	Rural	160	1	No EMS	Yes	69	2	1	2	7	0
1	Rural	0	0	0	0	70	2	2	2	1	0
2	Rural	80	1	No EMS	No	70	2	2	2	2	1
3	Urban	0	0	0	0	70	2	2	2	3	1
4	Urban	80	1	No EMS	No	70	2	2	2	5	0
5	Urban	160	1	No EMS	No	70	2	2	2	4	1
6	Urban	160	10	No EMS	No	70	2	2	2	6	0
7	Rural	80	2	No EMS	No	70	2	2	2	5	0
8	Rural	640	1	No EMS	No	70	2	2	2	5	0
9	Urban	320	1	No EMS	No	70	2	2	2	4	0
10	Rural	160	1	No EMS	No	70	2	2	2	4	0
11	Urban	80	2	No EMS	No	70	2	2	2	5	0
12	Rural	160	5	No EMS	No	70	2	2	2	6	0
13	Urban	320	2	No EMS	No	70	2	2	2	4	0
14	Rural	80	3	No EMS	No	70	2	2	2	6	0
15	Rural	320	1	No EMS	No	70	2	2	2	4	0
16	Rural	160	10	No EMS	No	70	2	2	2	9	0
17	Urban	640	1	No EMS	No	70	2	2	2	3	1
18	Urban	160	5	No EMS	No	70	2	2	2	8	0
19	Rural	160	2	No EMS	No	70	2	2	2	5	0
20	Urban	160	2	No EMS	No	70	2	2	2	5	0
21	Rural	80	1	EMS	No	70	2	2	2	3	1
22	Rural	160	1	EMS	No	70	2	2	2	3	1
23	Urban	80	1	EMS	No	70	2	2	2	4	1
24	Urban	160	1	EMS	No	70	2	2	2	3	1
25	Urban	80	1	No EMS	Yes	70	2	2	2	5	0
26	Urban	160	1	No EMS	Yes	70	2	2	2	5	0
27	Rural	80	1	No EMS	Yes	70	2	2	2	4	0
28	Rural	160	1	No EMS	Yes	70	2	2	2	4	0
1	Rural	0	0	0	0	71	3	1	2	0	1
2	Rural	80	1	No EMS	No	71	3	1	2	1	1
3	Urban	0	0	0	0	71	3	1	2	0	1
4	Urban	80	1	No EMS	No	71	3	1	2	2	1
5	Urban	160	1	No EMS	No	71	3	1	2	1	1
6	Urban	160	10	No EMS	No	71	3	1	2	7	0
7	Rural	80	2	No EMS	No	71	3	1	2	3	1
8	Rural	640	1	No EMS	No	71	3	1	2	1	1
9	Urban	320	1	No EMS	No	71	3	1	2	1	1
10	Rural	160	1	No EMS	No	71	3	1	2	1	1
11	Urban	80	2	No EMS	No	71	3	1	2	4	0
12	Rural	160	5	No EMS	No	71	3	1	2	6	0
13	Urban	320	2	No EMS	No	71	3	1	2	2	1
14	Rural	80	3	No EMS	No	71	3	1	2	3	1
15	Rural	320	1	No EMS	No	71	3	1	2	1	1
16	Rural	160	10	No EMS	No	71	3	1	2	8	0
17	Urban	640	1	No EMS	No	71	3	1	2	1	1
18	Urban	160	5	No EMS	No	71	3	1	2	6	0
19	Rural	160	2	No EMS	No	71	3	1	2	1	1
20	Urban	160	2	No EMS	No	71	3	1	2	2	1
21	Rural	80	1	EMS	No	71	3	1	2	1	1
22	Rural	160	1	EMS	No	71	3	1	2	1	1
23	Urban	80	1	EMS	No	71	3	1	2	1	1
24	Urban	160	1	EMS	No	71	3	1	2	1	1
25	Urban	80	1	No EMS	Yes	71	3	1	2	2	1
26	Urban	160	1	No EMS	Yes	71	3	1	2	2	1
27	Rural	80	1	No EMS	Yes	71	3	1	2	2	1
28	Rural	160	1	No EMS	Yes	71	3	1	2	2	1
1	Rural	0	0	0	0	72	2	1	4	3	1
2	Rural	80	1	No EMS	No	72	2	1	4	4	1
3	Urban	0	0	0	0	72	2	1	4	3	1
4	Urban	80	1	No EMS	No	72	2	1	4	5	1
5	Urban	160	1	No EMS	No	72	2	1	4	4	1
6	Urban	160	10	No EMS	No	72	2	1	4	7	1
7	Rural	80	2	No EMS	No	72	2	1	4	5	1
8	Rural	640	1	No EMS	No	72	2	1	4	3	1
9	Urban	320	1	No EMS	No	72	2	1	4	3	1
10	Rural	160	1	No EMS	No	72	2	1	4	3	1
11	Urban	80	2	No EMS	No	72	2	1	4	4	1
[truncated: 4,945 more rows]

## Sheet: Variable
Picture	Picture: Number from 1 to 28 that represents the order in which the picture was shown in the test.
Environement	Environment: 0- Rural, 1- Urban
Distance from the clests drone	Distance to the closest UAV.
Number	The number of UAVs.
Purpose	0- No EMS, 1- EMS (if it is an EMS UAV or not)
Awareness	0- There is no extra information in the picture. 1- There is extra information provided in the picture.
ID	Respondent number from 1 to 248.
Age	1- Less than 18, 2- From 18 to 30, 3- From 30 to 50, 4-From 50 to 65, 5- Plus than 65.
Opinion	0- No opinion about UAVs, 1- Positive opinion, 2- Negative opinion.
Knowledge	1- None, 2- Basic (The participant stated that (s)he could write a paragraph about UAVs), 3- Medium (The participant could write a page about UAVs), 4- Expert (The participant could write five pages about UAVs).
Rank	Number from 0 to 10, where zero is no pollution and ten represents strong pollution.
Tolerable	0- Not tolerable, 1- Tolerable.
